# Supplementary material for: Enantioselective synthesis of (–)-chloramphenicol via silver-catalysed asymmetric isocyanoacetate aldol reaction
Source: PubMed Central journal article supplement (PMC4756631; doi:10.1039/c5ob02141c), 2015-10-29
Supplement: OB-014-C5OB02141C-s001.pdf [file OB-014-C5OB02141C-s001.pdf]

*Supporting Information*

**Enantioselective Synthesis of (–)-Chloramphenicol via Silver-Catalysed Asymmetric Isocyanoacetate Aldol Reaction**

Allegra Franchino, Pavol Jakubec and Darren J. Dixon

Chemistry Research Laboratory, Department of Chemistry, University of Oxford,  
12 Mansfield Road, Oxford, OX1 3TA, United Kingdom

# Table of Contents

|                                                                                                 |            |
|-------------------------------------------------------------------------------------------------|------------|
| <b>1. Supplementary tables</b>                                                                  | <b>S3</b>  |
| <b>2. Practical experimental</b>                                                                | <b>S4</b>  |
| 2.1. General remarks                                                                            | S4         |
| 2.2. Synthesis of 2-formamidoacetates <b>10</b>                                                 | S5         |
| 2.3. Synthesis of 2-isocyanoacetates <b>7</b>                                                   | S8         |
| 2.4. Synthesis and characterisation of oxazolines <b>6</b>                                      | S10        |
| 2.5. Synthesis and characterisation of <b>5</b>                                                 | S14        |
| 2.6. Synthesis and characterisation of <b>9</b>                                                 | S15        |
| 2.7. Synthesis and characterisation of (–)-chloramphenicol and (+)-chloramphenicol ( <b>1</b> ) | S16        |
| <b>3. <sup>1</sup>H and <sup>13</sup>C NMR spectra</b>                                          | <b>S17</b> |
| <b>4. HPLC traces</b>                                                                           | <b>S30</b> |
| <b>5. References</b>                                                                            | <b>S43</b> |

# 1. Supplementary tables

**Table S1. Solvent screening in the isocyanoacetate aldol reaction between 8 and 7a<sup>a</sup>**

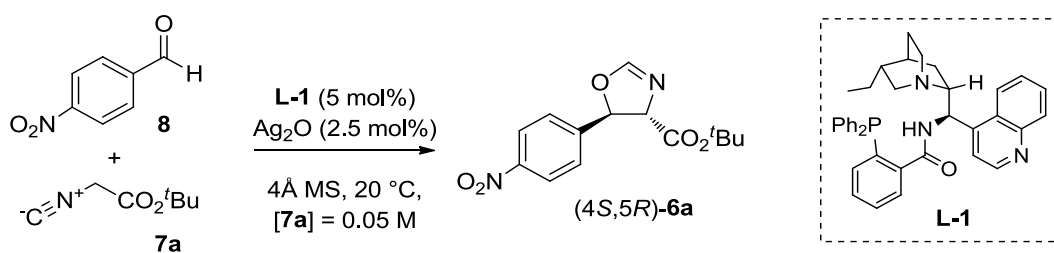

| Entry          | Solvent                         | Time (min) | Yield <sup>b</sup> (%) | Dr <sup>c</sup> ( <i>trans</i> : <i>cis</i> ) | Ee <sup>d</sup> (%) |
|----------------|---------------------------------|------------|------------------------|-----------------------------------------------|---------------------|
| 1              | AcOEt                           | 30         | 73                     | 91:9                                          | 69                  |
| 2              | toluene                         | 40         | 69                     | 91:9                                          | 60                  |
| 3              | CH <sub>3</sub> CN              | 30         | 65                     | 82:18                                         | 61                  |
| 4              | MTBE                            | 60         | 78                     | 90:10                                         | 52                  |
| 5 <sup>e</sup> | AcOEt                           | 30         | 44                     | 92:8                                          | 45                  |
| 6 <sup>e</sup> | CH <sub>2</sub> Cl <sub>2</sub> | 30         | 47                     | 82:18                                         | 37                  |

<sup>a</sup> 0.25 mmol, **7a**; 1.2 equiv, **8**. <sup>b</sup> Isolated yield of *trans* diastereomer after FCC. <sup>c</sup> Dr determined by <sup>1</sup>H NMR analysis of the crude reaction mixture. <sup>d</sup> Ee of *trans* diastereomer determined by HPLC on chiral stationary phase. <sup>e</sup> Reaction performed with [**7a**] = 0.3 M, starting at -78 °C and then allowing the reaction mixture to warm up to 20 °C over 30 minutes.

**Table S2. Catalyst loading studies in the isocyanoacetate aldol reaction between 8 and 7f**

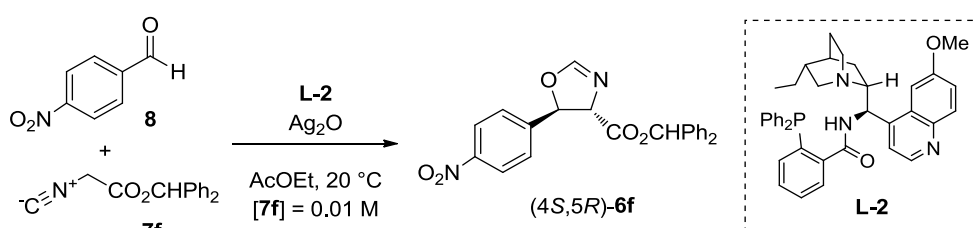

| Entry | <b>7f</b> (mmol) | <b>L-2</b> (mol %) | Ag <sub>2</sub> O (mol %) | Time (h) | Yield <sup>a</sup> (%) | Dr <sup>b</sup> ( <i>trans</i> : <i>cis</i> ) | Ee <sup>c</sup> (%) |
|-------|------------------|--------------------|---------------------------|----------|------------------------|-----------------------------------------------|---------------------|
| 1     | 2.5              | 5                  | 2.5                       | 2.5      | 72                     | 91:9                                          | 90                  |
| 2     | 2.5              | 0                  | 2.5                       | 24       | 51                     | 91:9                                          | 0                   |
| 3     | 0.5              | 10                 | 5                         | 0.75     | 67                     | 91:9                                          | 89                  |
| 4     | 5.0              | 5                  | 1.25                      | 2.5      | 70                     | 91:9                                          | 88                  |

<sup>a</sup> Isolated yield of *trans* diastereomer after FCC. <sup>b</sup> Dr determined by <sup>1</sup>H NMR analysis of the crude reaction mixture. <sup>c</sup> Ee of *trans* diastereomer determined by HPLC on chiral stationary phase.

## 2. Practical experimental

### 2.1. General Remarks

Reactions were performed with magnetic stirring under a positive pressure of nitrogen, unless otherwise stated. Chemicals were obtained from commercial suppliers and used as received.

Bulk solutions were evaporated under reduced pressure using a Büchi rotary evaporator. All solvents were commercially supplied or dried by filtration through activated alumina (powder ~150 mesh, pore size 58 Å, basic, Sigma-Aldrich) columns. Petrol ether (PE) refers to distilled light petroleum of fraction (30 - 40 °C).

Flash column chromatography (FCC) was carried out using Merck silica gel 60 (40-63 µm) as stationary phase.<sup>1</sup> All reactions were followed by thin-layer chromatography (TLC) when practical, using Merck Kieselgel 60 F<sub>254</sub> fluorescent treated silica. Visualisation was accomplished under UV light ( $\lambda_{\text{max}} = 254 \text{ nm}$ ) and by staining with aqueous potassium permanganate alkaline solution or vanillin staining dip (prepared by adding 2.5 mL of concentrated H<sub>2</sub>SO<sub>4</sub> to a solution of 15 g of vanillin in 250 mL EtOH 95%). Enantiomeric excesses were determined by HPLC analysis on an Agilent 1200 Series instrument using the chiral stationary phase column specified in the individual experiment and by comparing the sample with the appropriate racemic mixture.

NMR spectra were recorded on Bruker spectrometers operating at 400 or 500 MHz (<sup>1</sup>H resonance). Proton chemical shifts ( $\delta$ ) are given in parts per million (ppm) relative to tetramethylsilane (TMS) with the solvent resonance as internal standard:<sup>2</sup> CDCl<sub>3</sub>,  $\delta = 7.26 \text{ ppm}$ ; CD<sub>2</sub>Cl<sub>2</sub>,  $\delta = 5.32 \text{ ppm}$ ; (CD<sub>3</sub>)<sub>2</sub>SO,  $\delta = 2.50 \text{ ppm}$ ; (CD<sub>3</sub>)<sub>2</sub>CO,  $\delta = 2.05 \text{ ppm}$ . <sup>1</sup>H NMR spectra are reported as follows: ppm (number of protons, multiplicity, coupling constants). The following abbreviations are used to describe spin multiplicity: s = singlet, d = doublet, t = triplet, q = quartet, dd = doublet of doublets, dt = doublet of triplets, m = multiplet, br = broad signal, app = apparent. Coupling constants (*J*) are given in Hertz (Hz) and are rounded to the nearest integer or half integer. <sup>13</sup>C-NMR spectra were recorded with complete proton decoupling. Carbon chemical shifts are reported in ppm ( $\delta$ ) relative to TMS with the solvent resonance as internal standard:<sup>2</sup> CDCl<sub>3</sub>,  $\delta = 77.16 \text{ ppm}$ ; CD<sub>2</sub>Cl<sub>2</sub>,  $\delta = 53.84 \text{ ppm}$ ; (CD<sub>3</sub>)<sub>2</sub>SO,  $\delta = 39.52 \text{ ppm}$ ; (CD<sub>3</sub>)<sub>2</sub>CO,  $\delta = 29.84 \text{ ppm}$ . Two-dimensional NMR spectroscopy experiments (COSY, HSQC and HMBC) were used where appropriate to assist in the assignment of signals in <sup>1</sup>H and <sup>13</sup>C spectra and data are not reported.

High resolution mass spectra (HRMS) were recorded by the University of Oxford mass spectrometry staff on a Bruker MicroTOF mass spectrometer equipped with an ESI source or on a Micromass GCT equipped with an EI source.

Infrared absorption spectra (IR) were recorded on a Bruker Tensor 27 FT-IR spectrometer from a compressed sample of the solid or from a thin film (the sample was dissolved in CHCl<sub>3</sub> or acetone and the solvent evaporated) on a diamond ATR module. Bands ( $\nu_{\text{max}}$ ) are reported in wavenumbers (cm<sup>-1</sup>) and their intensity is indicated as strong (s), medium (m) or weak (w).

Optical rotations were recorded using a Perkin Elmer 341 polarimeter.  $[\alpha]_{\text{D}}^{\text{T}}$  values, reported in 10<sup>-1</sup> deg cm<sup>2</sup> g<sup>-1</sup>, are calculated on the average value of at least six consecutive readings. Concentrations (c) are quoted in g/100 mL with the appropriate number of significant figures; D refers to the D-line of sodium (589 nm); temperatures (T) are given in degrees Celsius (°C).

Melting points (m.p.) were recorded using a Reichert hot-stage microscope apparatus equipped with an analogic thermometer (2 °C graduation marks) or a Leica Galen III hot-stage microscope apparatus with digital thermometer and are reported uncorrected.

Compound names are those generated by Reaxys following the IUPAC nomenclature.

*N*-formyl glycine was synthesized following literature procedures.<sup>3</sup> Amino phosphine **L-1** and **L-3** were prepared from cinchonine and cinchonidine respectively following literature procedures.<sup>4</sup> Ligands **L-2** and **L-4** were prepared in an analogous fashion from quinidine and quinine respectively.<sup>5</sup> Methyl isocyanoacetate (**7b**) is commercially available.

### Scheme S1. Overview of the synthesis of isocyanoacetates **7**

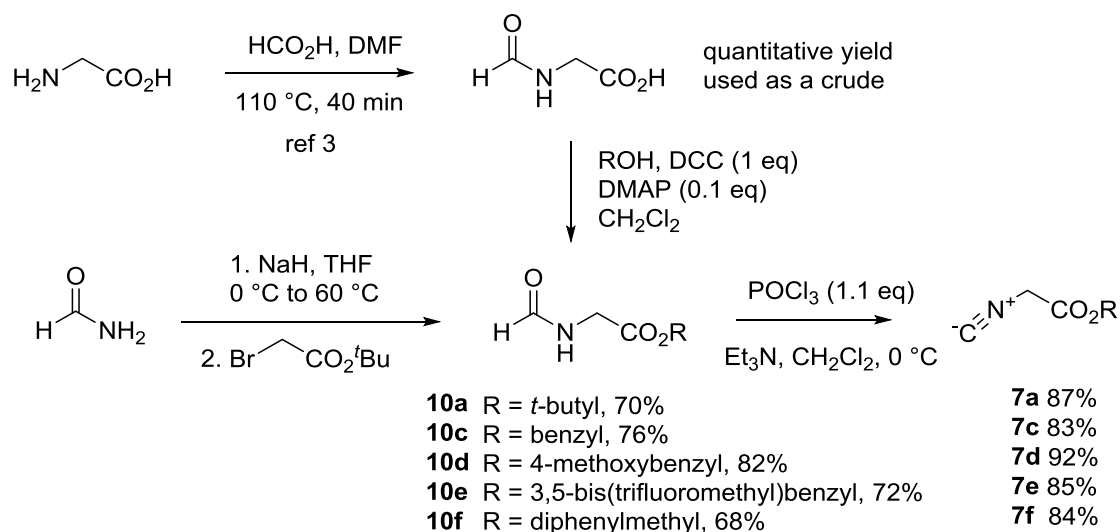

## 2.2. Synthesis of 2-formamidoacetates **10**

### *tert*-Butyl 2-formamidoacetate<sup>6</sup> (**10a**)

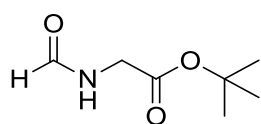

Formamide (45.0 mL, 1.1 mol, 7.4 eq) was added dropwise over 45 minutes to a stirred suspension of NaH (60% dispersion in mineral oil, 6.11 g, 153 mmol, 1.0 eq) in THF (300 mL) at 0 °C. After the addition, the reaction mixture was stirred for 15 minutes at rt, then solvents were removed under reduced pressure. The resulting yellow oil was warmed to 60 °C and *tert*-butyl bromoacetate (23.0 mL, 153 mmol, 1.0 eq) was added. The reaction mixture was stirred for 16 hours at rt, then saturated Na<sub>2</sub>CO<sub>3</sub> aqueous solution (100 mL) was added and the aqueous layer was extracted with CH<sub>2</sub>Cl<sub>2</sub> (3 × 150 mL). The combined organic phases were washed with water, brine, dried over Na<sub>2</sub>SO<sub>4</sub>, filtered and evaporated. The crude mixture was purified by FCC (from PE/AcOEt 4:1 to AcOEt), obtaining the title compound **10a** as a pale yellow oil (17.1 g, 70%).

Analytical data are in accordance with those previously reported for this compound.<sup>6</sup>

<sup>1</sup>H NMR (CD<sub>2</sub>Cl<sub>2</sub>, 400 MHz): δ 8.18 (1H, s, CH=O, major rotamer), 7.98 (1H, d, *J* = 12.0 Hz, CH=O, minor rotamer), 6.59 (1H, br s, NH), 3.91 (2H, d, *J* = 5.5 Hz, CH<sub>2</sub>, major rotamer), 3.85 (2H, d, *J* = 6.5 Hz, CH<sub>2</sub>, minor rotamer), 1.45 (9H, s, CH<sub>3</sub>).

<sup>13</sup>C NMR (CD<sub>2</sub>Cl<sub>2</sub>, 100 MHz): δ 169.1 (C=O), 161.4 (CH=O), 82.5 (C(CH<sub>3</sub>)), 44.2 (CH<sub>2</sub>, minor rotamer) 40.9 (CH<sub>2</sub>, major rotamer), 28.1 (CH<sub>3</sub>).

### Benzyl 2-formamidoacetate (10c)

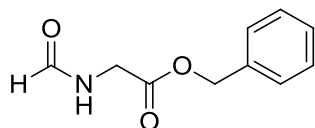

DCC (3.64 g, 17.6 mmol, 1.0 eq) and DMAP (215 mg, 1.76 mmol, 0.1 eq) were added in sequence to a stirred suspension of *N*-formyl glycine (2.00 g, 19.4 mmol, 1.1 eq) and benzyl alcohol (1.8 mL, 18 mmol, 1.0 eq) in CH<sub>2</sub>Cl<sub>2</sub> (60 mL) at 0 °C. The reaction mixture was stirred for 16 hours at rt, then the solids were filtered off and solvents were evaporated. Purification of the crude mixture by FCC (PE/AcOEt 1:2) afforded the title compound **10c** as a white solid (2.60 g, 76%).

Analytical data are in accordance with those previously reported for this compound.<sup>7</sup>

<sup>1</sup>H NMR (CDCl<sub>3</sub>, 400 MHz): δ 8.26 (1H, s, CH=O), 7.40-7.34 (5H, m, Ph), 6.08 (1H, br s, NH), 5.21 (2H, s, CH<sub>2</sub>Ph), 4.14 (2H, d, *J* = 5.5 Hz, NCH<sub>2</sub>).

<sup>13</sup>C NMR (CDCl<sub>3</sub>, 100 MHz): δ 169.5 (C=O), 161.0 (CH=O), 135.1 (C<sub>Ar</sub>), 128.9 (C<sub>Ar</sub>H), 128.8 (C<sub>Ar</sub>H), 128.6 (C<sub>Ar</sub>H), 67.6 (CH<sub>2</sub>Ph), 40.2 (NCH<sub>2</sub>).

M.p.: 37-39 °C.

### (4-Methoxyphenyl)methyl 2-formamidoacetate (10d)

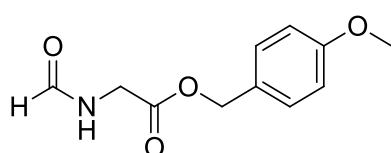

DCC (2.48 g, 12.0 mmol, 1.0 eq) and DMAP (150 mg, 1.20 mmol, 0.1 eq) were added in sequence to a stirred suspension of *N*-formyl glycine (1.36 g, 13.2 mmol, 1.1 eq) and 4-methoxybenzyl alcohol (1.5 mL, 12 mmol, 1.0 eq) in CH<sub>2</sub>Cl<sub>2</sub> (60 mL) at 0 °C. The reaction mixture was stirred for 24 hours at rt, then filtered through Celite<sup>®</sup>. The filtrate was washed with water (15 mL) and brine (15 mL), dried over Na<sub>2</sub>SO<sub>4</sub>, filtered and concentrated. Purification of the crude mixture by FCC (PE/AcOEt 1:2) afforded the title compound **10d** as a white solid (2.20 g, 82%).

<sup>1</sup>H NMR (CDCl<sub>3</sub>, 400 MHz): δ 8.21 (1H, s, CH=O, major rotamer), 8.01 (1H, d, *J* = 12.0 Hz, CH=O, minor rotamer), 7.28 (2H, d, *J* = 8.5 Hz, C<sub>Ar</sub>H), 6.88 (2H, d, *J* = 8.5 Hz, C<sub>Ar</sub>H), 6.38 (1H, br s, NH, major rotamer), 6.21 (1H, br s, NH, minor rotamer), 5.12 (2H, s, OCH<sub>2</sub>), 4.08 (2H, d, *J* = 5.5 Hz, NCH<sub>2</sub>, major rotamer), 3.98 (2H, d, *J* = 6.0 Hz, NCH<sub>2</sub>, minor rotamer), 3.80 (3H, s, OCH<sub>3</sub>).

<sup>13</sup>C NMR (CDCl<sub>3</sub>, 100 MHz): δ 169.5 (C=O), 164.7 (CH=O, minor rotamer), 161.3 (CH=O, major rotamer), 160.0 (C<sub>Ar</sub>), 130.5 (C<sub>Ar</sub>H), 127.1 (C<sub>Ar</sub>), 114.1 (C<sub>Ar</sub>H), 67.4 (OCH<sub>2</sub>), 55.4 (OCH<sub>3</sub>), 43.3 (NCH<sub>2</sub>, minor rotamer), 40.1 (NCH<sub>2</sub>, major rotamer).

HRMS (ESI, MeOH): calcd. for [M+Na]<sup>+</sup> (C<sub>11</sub>H<sub>13</sub>NNaO<sub>4</sub>) 246.0737, found 246.0735.

M.p.: 56-57 °C.

IR: 3319 (w, br), 1744 (s, OC=O stretch), 1666 (s, HC=O stretch), 1613 (m), 1515 (s), 1463 (w), 1386 (m), 1355 (w), 1247 (s), 1173 (s), 1031 (m), 822 (m).

### [3,5-Bis(trifluoromethyl)phenyl]methyl 2-formamidoacetate (10e)

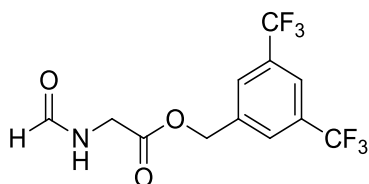

DCC (2.10 g, 10.0 mmol, 1.0 eq) and DMAP (122 mg, 1.00 mmol, 0.1 eq) were added in sequence to a stirred suspension of *N*-formyl glycine (1.13 g, 11.0 mmol, 1.1 eq) and 3,5-bis(trifluoromethyl)benzyl alcohol (2.49 g, 10.0 mmol, 1.0 eq) in CH<sub>2</sub>Cl<sub>2</sub> (50 mL) at 0 °C. The reaction mixture was stirred for 16 hours at rt, then filtered

through Celite<sup>®</sup>. The filtrate was washed with water (15 mL) and brine (15 mL), dried over Na<sub>2</sub>SO<sub>4</sub>, filtered and evaporated to afford a white solid. Purification of the crude mixture by FCC (PE/AcOEt 2:1) afforded the title compound **10e** as a white solid (2.37 g, 72%).

<sup>1</sup>H NMR (CDCl<sub>3</sub>, 400 MHz): δ 8.27 (1H, s, CHO, major rotamer), 8.06 (1H, d, *J* = 11.5 Hz, CHO, minor rotamer), 7.86 (1H, s, C<sub>Ar</sub>H), 7.82 (2H, s, C<sub>Ar</sub>H), 6.22 (1H, br s, NH), 5.30 (2H, s, OCH<sub>2</sub>), 4.17 (2H, d, *J* = 5.5 Hz, NCH<sub>2</sub>, major rotamer), 4.10 (2H, d, *J* = 5.5 Hz, NCH<sub>2</sub>, minor rotamer).

<sup>13</sup>C NMR (CDCl<sub>3</sub>, 100 MHz): δ 169.3 (C=O), 164.4 (CH=O, minor rotamer), 161.2 (CH=O, major rotamer), 137.7 (C<sub>Ar</sub>), 132.3 (C<sub>Ar</sub>, q, <sup>2</sup>*J*<sub>CF</sub> = 34.0 Hz), 128.4 (C<sub>Ar</sub>H, app d, <sup>3</sup>*J*<sub>CF</sub> = 3.0 Hz), 123.3 (CF<sub>3</sub>, q, <sup>1</sup>*J*<sub>CF</sub> = 273.0 Hz), 122.7 (C<sub>Ar</sub>H, app quint, <sup>3</sup>*J*<sub>CF</sub> = 3.5 Hz), 65.7 (OCH<sub>2</sub>), 43.2 (NCH<sub>2</sub>, minor rotamer), 40.0 (NCH<sub>2</sub>, major rotamer).

<sup>19</sup>F NMR (CDCl<sub>3</sub>, 376.5 MHz): δ -63.0.

HRMS (ESI, MeOH): calcd. for [M+Na]<sup>+</sup> (C<sub>12</sub>H<sub>9</sub>F<sub>6</sub>NNaO<sub>3</sub>) 352.0379, found 352.0370.

M.p.: 79-81 °C.

IR: 3300 (w, br), 1757 (s, OC=O stretch), 1665 (s, HC=O stretch), 1540 (w), 1391 (w), 1358 (w), 1289 (s), 1232 (m), 1169 (m), 1118 (s), 887 (w), 705 (w), 684 (w).

### Diphenylmethyl 2-formamidoacetate (**10f**)

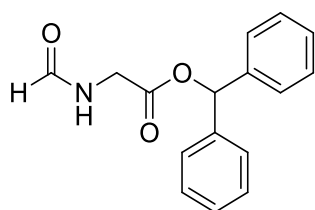

DCC (6.81 g, 33.0 mmol, 1.1 eq) and DMAP (4.03 g, 33.0 mmol, 1.1 eq) were added in sequence to a stirred suspension of *N*-formylglycine (3.74 g, 36.0 mmol, 1.2 eq) and diphenylmethanol (5.53 g, 30.0 mmol, 1.0 eq) in CH<sub>2</sub>Cl<sub>2</sub> (150 mL) at rt. The reaction mixture was stirred for 65 hours, then filtered through Celite<sup>®</sup>. The filtrate was washed with water (50

mL) and brine (50 mL), dried over Na<sub>2</sub>SO<sub>4</sub>, filtered and concentrated. Purification of the crude mixture by FCC (PE/AcOEt 1:1) afforded the title compound **10f** as a white solid (5.51 g, 68%).

Analytical data are in accordance with those previously reported for this compound.<sup>8</sup>

<sup>1</sup>H NMR (CDCl<sub>3</sub>, 400 MHz): δ 8.17 (1H, s, CH=O, major rotamer), 7.99 (1H, s, s, CH=O, minor rotamer), 7.38-7.28 (10H, m, C<sub>Ar</sub>H), 6.93 (1H, s, CHPh<sub>2</sub>), 6.40 (1H, br s, NH, major rotamer), 6.24 (1H, br s, NH, minor rotamer) 4.17 (2H, d, *J* = 5.5 Hz, CH<sub>2</sub>, major rotamer), 4.02 (2H, d, *J* = 6.5 Hz, CH<sub>2</sub>, minor rotamer).

<sup>13</sup>C NMR (CDCl<sub>3</sub>, 100 MHz): δ 168.8 (C=O), 161.5 (CH=O), 139.4 (C<sub>Ar</sub>), 128.6 (C<sub>Ar</sub>H), 128.2 (C<sub>Ar</sub>H), 127.0 (C<sub>Ar</sub>H), 78.2 (CHPh<sub>2</sub>), 40.0 (CH<sub>2</sub>).

M.p.: 96-98 °C.

## 2.3. Synthesis of 2-isocyanoacetates 7

### *tert*-Butyl 2-isocyanoacetate<sup>6</sup> (7a)

POCl<sub>3</sub> (7.48 mL, 80.2 mmol, 1.1 eq) was added dropwise over 20 minutes to a stirred solution of *tert*-butyl 2-formamidoacetate (**10a**, 11.6 g, 72.9 mmol, 1.0 eq) and Et<sub>3</sub>N (24.4 mL, 175 mmol, 2.4 eq) in CH<sub>2</sub>Cl<sub>2</sub> (150 mL) at 0 °C. Upon addition the colorless reaction mixture became turbid and turned orange, then brown. After stirring at 0 °C for 15 minutes, saturated NaHCO<sub>3</sub> aqueous solution (100 mL) was added and the phases were separated. The aqueous layer was extracted twice with CH<sub>2</sub>Cl<sub>2</sub> (150 mL), then the collected organic phases were washed with brine, dried over K<sub>2</sub>CO<sub>3</sub> and filtered. Evaporation of solvents afforded a brown oil, which was purified by FCC (PE/AcOEt 4:1). The title compound **7a** was obtained as a pale yellow liquid (8.92 g, 87%).

Analytical data match the ones previously reported for this compound.<sup>6</sup>

<sup>1</sup>H-NMR (CDCl<sub>3</sub>, 400 MHz): δ 4.08 (2H, s, CH<sub>2</sub>), 1.43 (9H, s, CH<sub>3</sub>).

<sup>13</sup>C-NMR (CDCl<sub>3</sub>, 100 MHz): δ 162.9 (C=O), 160.3 (NC), 83.9 (C(CH<sub>3</sub>)<sub>3</sub>), 44.2 (CH<sub>2</sub>), 27.7 (CH<sub>3</sub>).

### Benzyl 2-isocyanoacetate<sup>9</sup> (7c)

POCl<sub>3</sub> (1.33 mL, 14.2 mmol, 1.1 eq) was added dropwise over 5 minutes to a stirred solution of benzyl 2-formamidoacetate (**10c**, 2.50 g, 12.9 mmol, 1.0 eq) and Et<sub>3</sub>N (6.1 mL, 44 mmol, 3.4 eq) in CH<sub>2</sub>Cl<sub>2</sub> (40 mL) at 0 °C. Upon addition the pale yellow solution turned pink, then orange. After stirring at 0 °C for 1.5 hours, a Na<sub>2</sub>CO<sub>3</sub> aqueous solution (4 g in 20 mL of water) was added, the biphasic reaction mixture was stirred at rt for 5 minutes, water (20 mL) was then added and the phases were separated. The aqueous layer was extracted twice with CH<sub>2</sub>Cl<sub>2</sub> (60 mL), then the combined organic phases were washed with brine, dried over K<sub>2</sub>CO<sub>3</sub> and filtered. Evaporation of solvents afforded a brown oil, which was purified by FCC (PE/AcOEt 3:1). The title compound **7c** was obtained as a yellow solid (1.88 g, 83%).

Analytical data are in accordance with those previously reported for this compound.<sup>9</sup>

<sup>1</sup>H NMR (CDCl<sub>3</sub>, 400 MHz): δ 7.39 (5H, s, Ph), 5.23 (2H, s, CH<sub>2</sub>Ph), 4.22 (2H, s, NCH<sub>2</sub>).

<sup>13</sup>C NMR (CDCl<sub>3</sub>, 100 MHz): δ 163.9 (C=O), 161.1 (NC), 134.4 (C<sub>Ar</sub>), 128.7 (C<sub>Ar</sub>H), 128.6 (C<sub>Ar</sub>H), 128.5 (C<sub>Ar</sub>H), 68.1 (CH<sub>2</sub>Ph), 43.4 (NCH<sub>2</sub>).

M.p.: 31-33 °C.

### (4-Methoxyphenyl)methyl 2-isocyanoacetate (7d)

POCl<sub>3</sub> (920 μL, 9.86 mmol, 1.1 eq) was added dropwise to a stirred solution of 2-formamidoacetate **10d** (2.00 g, 8.96 mmol, 1.0 eq) and Et<sub>3</sub>N (3.0 mL, 22 mmol, 2.4 eq) in CH<sub>2</sub>Cl<sub>2</sub> (45 mL) at 0 °C. After stirring at 0 °C for 2.5 hours, the reaction mixture was quenched by addition of saturated NaHCO<sub>3</sub> aqueous solution (15 mL). The phases were separated and the aqueous layer was extracted with CH<sub>2</sub>Cl<sub>2</sub> (25 mL). The combined organic phases were dried over Na<sub>2</sub>SO<sub>4</sub>, filtered and concentrated. The crude mixture was purified by FCC (CH<sub>2</sub>Cl<sub>2</sub>), affording the title compound **7d** as a yellow solid (1.70 g, 92%).



$^1\text{H}$  NMR ( $\text{CDCl}_3$ , 400 MHz):  $\delta$  7.31 (2H, d,  $J = 8.5$  Hz,  $\text{C}_{\text{Ar}}\text{H}$ ), 6.90 (2H, d,  $J = 8.5$  Hz,  $\text{C}_{\text{Ar}}\text{H}$ ), 5.18 (2H, s,  $\text{OCH}_2$ ), 4.22 (2H, s,  $\text{NCH}_2$ ), 3.81 (3H, s,  $\text{OCH}_3$ ).

$^{13}\text{C}$  NMR ( $\text{CDCl}_3$ , 100 MHz):  $\delta$  164.0 ( $\text{C}=\text{O}$ ), 161.4 ( $\text{NC}$ ), 160.2 ( $\text{C}_{\text{Ar}}$ ), 130.7 ( $\text{C}_{\text{Ar}}\text{H}$ ), 126.6 ( $\text{C}_{\text{Ar}}$ ), 114.2 ( $\text{C}_{\text{Ar}}\text{H}$ ), 68.4 ( $\text{OCH}_2$ ), 55.4 ( $\text{OCH}_3$ ), 43.7 ( $\text{NCH}_2$ ).

HRMS (ESI, MeOH): calcd. for  $[\text{M}+\text{H}]^+$  ( $\text{C}_{11}\text{H}_{12}\text{NO}_3$ ) 206.0812, found 206.0810.

M.p.: 39-41 °C.

IR: 2162 (m,  $\text{N}\equiv\text{C}$  stretch), 1754 (s,  $\text{C}=\text{O}$  stretch), 1613 (m), 1515 (s), 1462 (w), 1383 (w), 1350 (w), 1245 (s), 1196 (s), 1174 (s), 1010 (m), 821 (m), 705 (w).

### [3,5-Bis(trifluoromethyl)phenyl]methyl 2-isocyanoacetate (**7e**)

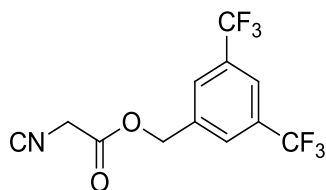

$\text{POCl}_3$  (0.62 mL, 6.7 mmol, 1.1 eq) was added dropwise to a stirred solution of 2-formamidoacetate **10e** (2.00 g, 6.07 mmol, 1.0 eq) and  $\text{Et}_3\text{N}$  (2.0 mL, 15 mmol, 2.4 eq) in  $\text{CH}_2\text{Cl}_2$  (30 mL) at 0 °C. After stirring at 0 °C for 1.5 hours, the reaction mixture was quenched by addition of saturated  $\text{NaHCO}_3$  aqueous solution (15 mL). The phases

were separated and the aqueous layer was extracted with  $\text{CH}_2\text{Cl}_2$  (30 mL). The combined organic phases were dried over  $\text{Na}_2\text{SO}_4$ , filtered and evaporated to afford an orange oil. The crude mixture was purified by FCC ( $\text{CH}_2\text{Cl}_2$ ), obtaining the title compound **7e** as a pale yellow solid (1.60 g, 85%).

$^1\text{H}$  NMR ( $\text{CDCl}_3$ , 400 MHz):  $\delta$  7.89 (1H, s,  $\text{C}_{\text{Ar}}\text{H}$ ), 7.84 (2H, s,  $\text{C}_{\text{Ar}}\text{H}$ ), 5.35 (2H, s,  $\text{OCH}_2$ ), 4.33 (2H, s,  $\text{NCH}_2$ ).

$^{13}\text{C}$  NMR ( $\text{CDCl}_3$ , 100 MHz):  $\delta$  163.8 ( $\text{C}=\text{O}$ ), 162.3 ( $\text{NC}$ ), 136.9 ( $\text{C}_{\text{Ar}}$ ), 132.4 ( $\text{C}_{\text{Ar}}$ , q,  $^2J_{\text{CF}} = 34.0$  Hz), 128.6 ( $\text{C}_{\text{Ar}}\text{H}$ , app d,  $^3J_{\text{CF}} = 2.0$  Hz), 123.1 ( $\text{CF}_3$ , q,  $^1J_{\text{CF}} = 273.0$  Hz), 123.0 ( $\text{C}_{\text{Ar}}\text{H}$ , app quint,  $^3J_{\text{CF}} = 3.5$  Hz), 66.6 ( $\text{OCH}_2$ ), 43.5 ( $\text{NCH}_2$ ).

$^{19}\text{F}$  NMR ( $\text{CDCl}_3$ , 376.5 MHz):  $\delta$  -63.0.

M.p.: 61-62 °C.

IR: 2165 (w,  $\text{N}\equiv\text{C}$  stretch), 1766 (m,  $\text{C}=\text{O}$ ), 1613 (m), 1394 (w), 1350 (w), 1278 (s), 1173 (s), 1129 (s), 1022 (w), 890 (w), 844 (w), 795 (w), 683 (m).

HRMS (EI): calcd. for  $[\text{M}]^+$  ( $\text{C}_{12}\text{H}_7\text{F}_6\text{NO}_2$ ) 311.0381, found 311.0390.

### Diphenylmethyl 2-isocyanoacetate<sup>8</sup> (**7f**)

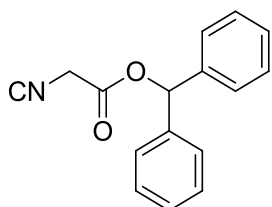

A solution of 2-formamidoacetate **10f** (4.00 g, 14.8 mmol, 1.0 eq) and  $\text{Et}_3\text{N}$  (5.0 mL, 36 mmol, 2.4 eq) in  $\text{CH}_2\text{Cl}_2$  (75 mL) was cooled to 0 °C, then  $\text{POCl}_3$  (1.5 mL, 16 mmol, 1.1 eq) was added dropwise. During the addition the reaction mixture turned yellow. The reaction mixture was stirred at 0 °C for 1.5 hours, then saturated  $\text{Na}_2\text{CO}_3$  aqueous solution was added (30 mL)

and the phases were separated. The organic layer was washed with water (30 mL), brine (30 mL), dried over  $\text{Na}_2\text{SO}_4$ , filtered and concentrated under reduced pressure. The crude mixture was purified by FCC (PE/AcOEt 4:1) affording the title compound **7f** as a pale orange solid (3.13 g, 84%).

Analytical data are in accordance with those previously reported for this compound.<sup>8,10</sup>

$^1\text{H}$ -NMR ( $\text{CDCl}_3$ , 400 MHz):  $\delta$  7.39-7.33 (10H, m,  $\text{C}_{\text{Ar}}\text{H}$ ), 6.99 (1H, s,  $\text{CHPh}_2$ ), 4.30 (2H, s,  $\text{CH}_2$ ).

$^{13}\text{C}$ -NMR ( $\text{CDCl}_3$ , 100 MHz):  $\delta$  163.1 ( $\text{C}=\text{O}$ ), 161.7 ( $\text{NC}$ ), 138.9 ( $\text{C}_{\text{Ar}}$ ), 128.8 ( $\text{C}_{\text{ArH}}$ ), 128.5 ( $\text{C}_{\text{ArH}}$ ), 127.1 ( $\text{C}_{\text{ArH}}$ ), 79.3 ( $\text{CHPh}_2$ ), 43.7 ( $\text{CH}_2$ ).

M.p.: 54 °C.

## 2.4. Synthesis and characterisation of oxazolines 6

### General procedure A for the racemic synthesis of oxazolines 6

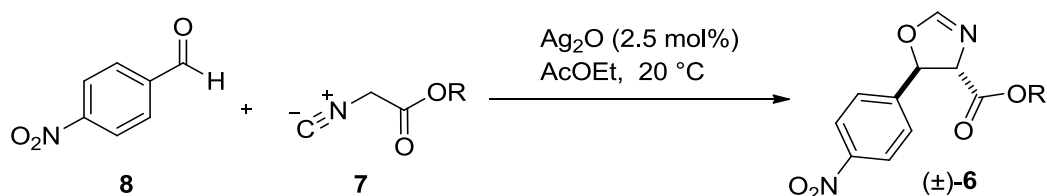

$\text{Ag}_2\text{O}$  (1.4 mg, 0.00625 mmol, 0.025 eq) was added to a stirred solution of isocyanoacetate **7** (0.250 mmol, 1.0 eq) and 4-nitrobenzaldehyde (**8**, 42.0 mg, 0.275 mmol, 1.1 eq) in AcOEt (25 mL). The resulting mixture was stirred at rt until the isocyanoacetate was consumed (as judged by TLC, PE/AcOEt 4:1, developed with vanillin staining dip). The reaction mixture was quickly filtered through Celite<sup>®</sup> eluting with AcOEt. The filtrate was concentrated under reduced pressure and purified by FCC (PE/AcOEt) obtaining (±)-**6**.

### General procedure B for the enantioselective synthesis of oxazolines 6

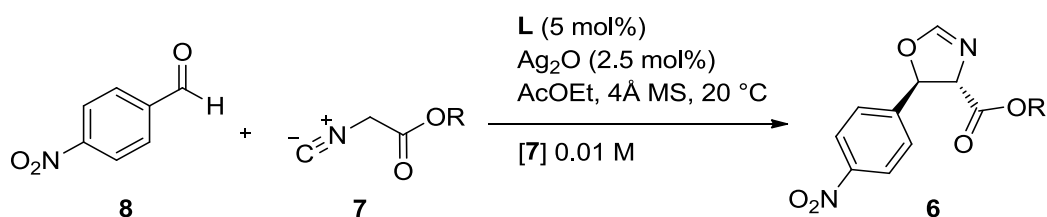

The desired ligand **L** (0.0125 mmol, 0.05 eq),  $\text{Ag}_2\text{O}$  (1.4 mg, 0.00625 mmol, 0.025 eq) and powdered 4Å MS (72 mg per 0.25 mmol of **7**) were stirred in AcOEt (15 mL) at rt for 15 minutes. A solution of isocyanoacetate **7** (0.250 mmol, 1.0 eq) in AcOEt (5 mL) was then added. After approximately 5 minutes, a solution of 4-nitrobenzaldehyde (**8**, 42.0 mg, 0.275 mmol, 1.1 eq) in AcOEt (5 mL) was added, then the reaction mixture was stirred at rt until the isocyanoacetate was consumed (as judged by TLC, PE/AcOEt 4:1, revealed with vanillin staining dip). The reaction mixture was quickly filtered through Celite<sup>®</sup> eluting with AcOEt. The filtrate was concentrated under reduced pressure and purified by FCC with the eluent indicated for each compound.

#### *tert*-Butyl (4*S*,5*R*)-5-(4-nitrophenyl)-4,5-dihydro-1,3-oxazole-4-carboxylate (**6a**)

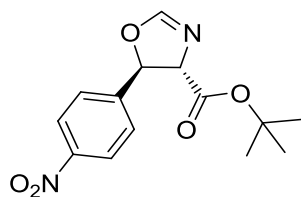

Obtained according to general procedure B, using **L-1** (7.3 mg, 0.0125 mmol, 0.05 eq) and *tert*-butyl isocyanoacetate **7a** (35.3 mg, 0.250 mmol, 1.0 eq). The crude mixture was purified by FCC (from PE/ AcOEt 4:1 to 1:1) obtaining the title compound **6a** as an off-white solid (51.1 mg, 70%).

Enantiomeric excess (78% ee) was determined by chiral HPLC analysis under the following conditions: 0.5 mg in 1 mL *i*-PrOH, Chiralpak OD column, hexane/*i*-PrOH 90:10, flow 1.0 mL/min,  $\lambda$  254 nm,  $t$  (major) = 13.6 min,  $t$  (minor) = 16.8 min.

$^1\text{H}$  NMR (DMSO- $d_6$ , 500 MHz):  $\delta$  8.29 (2H, d,  $J = 8.5$  Hz,  $\text{C}_{\text{Ar}}\text{H}$ ), 7.61 (2H, d,  $J = 8.5$  Hz,  $\text{C}_{\text{Ar}}\text{H}$ ), 7.54 (1H, d,  $J = 2.0$  Hz,  $\text{N}=\text{CH}$ ), 5.75 (1H, d,  $J = 7.5$  Hz,  $\text{OCHAr}$ ), 4.49 (1H, dd,  $J = 7.5, 2.0$  Hz,  $\text{NCHCO}_2$ ), 1.46 (9H, s,  $\text{CH}_3$ ).

$^{13}\text{C}$  NMR (DMSO- $d_6$ , 125 MHz):  $\delta$  168.8 ( $\text{C}=\text{O}$ ), 156.4 ( $\text{C}=\text{N}$ ), 147.5 ( $\text{C}_{\text{Ar}}$ ), 146.7 ( $\text{C}_{\text{Ar}}$ ), 127.0 ( $\text{C}_{\text{Ar}}\text{H}$ ), 124.0 ( $\text{C}_{\text{Ar}}\text{H}$ ), 81.9 ( $\text{C}(\text{CH}_3)_3$ ), 80.1 ( $\text{OCHAr}$ ), 75.6 ( $\text{NCHCO}_2$ ), 27.6 ( $\text{CH}_3$ ).

HRMS (ESI, MeOH): calcd. for  $[\text{M}+\text{Na}]^+$  ( $\text{C}_{14}\text{H}_{16}\text{N}_2\text{NaO}_5$ ) 315.0951, found 315.0957.

M.p.: 65-70  $^\circ\text{C}$ .

IR: 2980 (w), 2927 (w), 1747 (s,  $\text{C}=\text{O}$  stretch), 1637 (m,  $\text{C}=\text{N}$  stretch), 1603 (w), 1511 (s), 1346 (s), 1315 (w), 1229 (m), 1151 (s), 1109 (m), 1081 (s), 1051 (s), 1014 (w), 968 (m), 841 (s), 787 (m), 751 (w), 721 (m), 697 (m), 667 (m).

$[\alpha]_{\text{D}}^{20}$ : +119 (c 1.43, AcOEt, sample with 65% ee).

### Methyl (4*S*,5*R*)-5-(4-nitrophenyl)-4,5-dihydro-1,3-oxazole-4-carboxylate (**6b**)

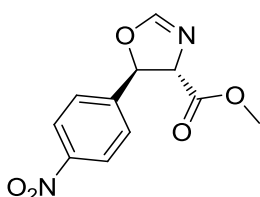

Obtained according to general procedure B, using **L-1** (7.3 mg, 0.0125 mmol, 0.05 eq) and methyl isocyanoacetate (26.1 mg, 0.250 mmol, 1.0 eq). The crude mixture was purified by FCC (PE/AcOEt 3:2 to 1:2) obtaining the title compound **6b** as a pale yellow oil (50.0 mg, 80%).

Enantiomeric excess (82% ee) was determined by chiral HPLC analysis under the following conditions: 0.5 mg in 1 mL *i*-PrOH, Chiralpak AD column, hexane/*i*-PrOH 85:15, flow 1.0 mL/min,  $\lambda$  240 nm,  $t$  (minor) = 17.3 min,  $t$  (major) = 26.6 min.

$^1\text{H}$  NMR is in accordance with that previously reported for this compound.<sup>11</sup>

$^1\text{H}$  NMR ( $\text{CDCl}_3$ , 400 MHz):  $\delta$  8.26 (2H, d,  $J = 8.5$  Hz,  $\text{C}_{\text{Ar}}\text{H}$ ), 7.52 (2H, d,  $J = 8.5$  Hz,  $\text{C}_{\text{Ar}}\text{H}$ ), 7.13 (1H, d,  $J = 2.0$  Hz,  $\text{N}=\text{CH}$ ), 5.80 (1H, d,  $J = 8.0$  Hz,  $\text{OCHAr}$ ), 4.58 (1H, dd,  $J = 8.0, 2.0$  Hz,  $\text{NCHCO}_2$ ), 3.87 (3H, s,  $\text{CH}_3$ ).

$^{13}\text{C}$  NMR ( $\text{CDCl}_3$ , 100 MHz):  $\delta$  170.5 ( $\text{C}=\text{O}$ ), 156.1 ( $\text{C}=\text{N}$ ), 148.2 ( $\text{C}_{\text{Ar}}$ ), 146.1 ( $\text{C}_{\text{Ar}}$ ), 126.4 ( $\text{C}_{\text{Ar}}\text{H}$ ), 124.4 ( $\text{C}_{\text{Ar}}\text{H}$ ), 80.9 ( $\text{OCHAr}$ ), 75.7 ( $\text{NCHCO}_2$ ), 53.3 ( $\text{CH}_3$ ).

HRMS (ESI, MeOH): calcd. for  $[\text{M}+\text{Na}]^+$  ( $\text{C}_{11}\text{H}_{10}\text{N}_2\text{NaO}_5$ ) 273.0482, found 273.0481.

IR: 1739 (m,  $\text{C}=\text{O}$  stretch), 1628 (m,  $\text{C}=\text{N}$  stretch), 1606 (w), 1520 (s), 1437 (w), 1346 (s), 1205 (m), 1097 (s), 973 (w), 852 (m), 736 (m), 696 (m).

$[\alpha]_{\text{D}}^{20}$ : +198 (c 0.15, AcOEt, sample with 82% ee).

### Benzyl (4*S*,5*R*)-5-(4-nitrophenyl)-4,5-dihydro-1,3-oxazole-4-carboxylate (**6c**)

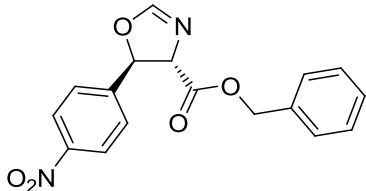

Obtained according to general procedure B, using **L-1** (7.3 mg, 0.0125 mmol, 0.05 eq) and benzyl isocyanoacetate (**7c**, 43.8 mg, 0.250 mmol, 1.0 eq). The crude mixture was purified by FCC (PE/AcOEt 4:1 to 3:1) obtaining the title compound **6c** as a pale yellow solid (49.8 mg, 61%).

Enantiomeric excess (87% ee) was determined by chiral HPLC analysis under the following conditions: 0.5 mg in 1 mL *i*-PrOH/EtOH 1:1, Chiralpak AD column, hexane/*i*-PrOH 85:15, flow 1.0 mL/min,  $\lambda$  254 nm,  $t$  (minor) = 25.3 min,  $t$  (major) = 28.4 min.

$^1\text{H}$  NMR (DMSO- $d_6$ , 400 MHz):  $\delta$  8.26 (2H, d,  $J = 8.5$  Hz,  $\text{C}_{\text{ArNO}_2}\text{H}$ ), 7.61 (2H, d,  $J = 8.5$  Hz,  $\text{C}_{\text{ArNO}_2}\text{H}$ ), 7.57 (1H, d,  $J = 2.0$  Hz,  $\text{N}=\text{CH}$ ), 7.42-7.35 (5H, m, Ph), 5.88 (1H, d,  $J = 7.5$  Hz,  $\text{OCHAr}$ ), 5.23 (2H, s,  $\text{OCH}_2\text{Ph}$ ), 4.71 (1H, dd,  $J = 7.5, 2.0$  Hz,  $\text{NCHCO}_2$ ).

$^{13}\text{C}$  NMR (DMSO- $d_6$ , 100 MHz):  $\delta$  169.6 ( $\underline{\text{C}}=\text{O}$ ), 156.7 ( $\underline{\text{C}}=\text{N}$ ), 147.5 ( $\underline{\text{C}}_{\text{ArNO}_2}$ ), 146.4 ( $\underline{\text{C}}_{\text{ArNO}_2}$ ), 135.5 ( $\underline{\text{C}}_{\text{Ph}}$ ), 128.5 ( $\underline{\text{C}}_{\text{ArH}}$ ), 128.2 ( $\underline{\text{C}}_{\text{ArH}}$ ), 128.1 ( $\underline{\text{C}}_{\text{ArH}}$ ), 127.1 ( $\underline{\text{C}}_{\text{ArH}}$ ), 124.0 ( $\underline{\text{C}}_{\text{ArH}}$ ), 80.0 ( $\underline{\text{OCHAr}}$ ), 74.7 ( $\underline{\text{NCHCO}_2}$ ), 66.7 ( $\underline{\text{OCH}_2\text{Ph}}$ ).

HRMS (ESI, MeOH): calcd. for  $[\text{M}+\text{Na}]^+$  ( $\text{C}_{17}\text{H}_{14}\text{N}_2\text{NaO}_5$ ) 349.0795, found 349.0796.

M.p.: 85-87 °C.

IR: 3090 (w), 2962 (w), 2837 (w), 1728 (s, C=O stretch), 1628 (m, C=N stretch), 1606 (w), 1519 (s), 1459 (w), 1380 (w), 1348 (s), 1315 (w), 1242 (s), 1213 (s), 1079 (s), 1039 (w), 1014 (w), 964 (m), 912 (w), 890 (w), 856 (m), 845 (m), 770 (m), 759 (s), 717 (m), 699 (s).

$[\alpha]_{\text{D}}^{20}$ : +103 (c 0.75, AcOEt, sample with 87% ee).

**(4-Methoxyphenyl)methyl (4S,5R)-5-(4-nitrophenyl)-4,5-dihydro-1,3-oxazole-4-carboxylate (6d)**

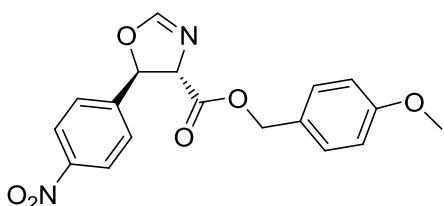

Obtained according to general procedure B, using **L-2** (7.7 mg, 0.0125 mmol, 0.05 eq) and isocyanoacetate **7d** (51.3 mg, 0.250 mmol, 1.0 eq). The crude mixture was purified by FCC (PE/AcOEt 3:1 to 1:1) obtaining the title compound **6d** as a pale yellow oil (56.1 mg, 63%).

Enantiomeric excess (86% ee) was determined by chiral HPLC analysis under the following conditions: 0.5 mg in 1 mL *i*-PrOH/EtOH 1:1, Chiralpak AD column, hexane/*i*-PrOH 80:20, flow 1.0 mL/min,  $\lambda$  254 nm,  $t$  (minor) = 26.2 min,  $t$  (major) = 30.5 min.

$^1\text{H}$  NMR (DMSO- $d_6$ , 400 MHz):  $\delta$  8.26 (2H, d,  $J$  = 8.5 Hz,  $\underline{\text{C}}_{\text{ArNO}_2\text{H}}$ ), 7.60 (2H, d,  $J$  = 8.5 Hz,  $\underline{\text{C}}_{\text{ArNO}_2\text{H}}$ ), 7.57 (1H, d,  $J$  = 2.0 Hz,  $\underline{\text{N}}=\underline{\text{CH}}$ ), 7.35 (2H, d,  $J$  = 9.0 Hz,  $\underline{\text{C}}_{\text{ArOMeH}}$ ), 6.95 (2H, d,  $J$  = 9.0 Hz,  $\underline{\text{C}}_{\text{ArOMeH}}$ ), 5.85 (1H, d,  $J$  = 7.5 Hz,  $\underline{\text{OCHAr}}$ ), 5.15 (2H, s,  $\underline{\text{OCH}_2\text{Ar}}$ ), 4.66 (1H, dd,  $J$  = 7.5, 2.0 Hz,  $\underline{\text{NCHCO}_2}$ ), 3.75 (3H, s,  $\underline{\text{OCH}_3}$ ).

$^{13}\text{C}$  NMR (DMSO- $d_6$ , 100 MHz):  $\delta$  169.6 ( $\underline{\text{C}}=\text{O}$ ), 159.3 ( $\underline{\text{C}}_{\text{ArOMe}}$ ), 156.7 ( $\underline{\text{C}}=\text{N}$ ), 147.5 ( $\underline{\text{C}}_{\text{ArNO}_2}$ ), 146.4 ( $\underline{\text{C}}_{\text{ArNO}_2}$ ), 130.1 ( $\underline{\text{C}}_{\text{ArOMeH}}$ ), 127.4 ( $\underline{\text{C}}_{\text{ArOMe}}$ ), 127.0 ( $\underline{\text{C}}_{\text{ArNO}_2\text{H}}$ ), 124.0 ( $\underline{\text{C}}_{\text{ArNO}_2\text{H}}$ ), 113.9 ( $\underline{\text{C}}_{\text{ArOMeH}}$ ), 80.0 ( $\underline{\text{OCHAr}}$ ), 74.7 ( $\underline{\text{NCHCO}_2}$ ), 66.6 ( $\underline{\text{OCH}_2\text{Ar}}$ ), 55.1 ( $\underline{\text{OCH}_3}$ ).

HRMS (ESI, MeOH): calcd. for  $[\text{M}+\text{Na}]^+$  ( $\text{C}_{18}\text{H}_{16}\text{N}_2\text{NaO}_6$ ) 379.0890, found 379.0901.

IR: 3359 (w, br), 2935 (w), 2840 (w), 1739 (m, C=O stretch), 1684 (m), 1629 (w, C=N stretch), 1611 (w), 1516 (s), 1462 (w), 1347 (s), 1248 (s), 1175 (m), 1108 (m), 1032 (m), 968 (w), 835 (w), 824 (w), 720 (w).

$[\alpha]_{\text{D}}^{20}$ : +142 (c 0.33, AcOEt, sample with 86% ee).

**[3,5-Bis(trifluoromethyl)phenyl)methyl (4S,5R)-5-(4-nitrophenyl)-4,5-dihydro-1,3-oxazole-4-carboxylate (6e)**

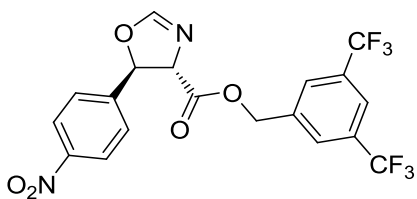

Obtained according to general procedure B, using **L-2** (7.7 mg, 0.0125 mmol, 0.05 eq) and isocyanoacetate **7e** (77.8 mg, 0.250 mmol, 1.0 eq). The crude mixture was purified by FCC (PE/AcOEt 3:1) obtaining the title compound **6e** as a clear oil (64.7 mg, 56%).

Enantiomeric excess (84% ee) was determined by chiral HPLC analysis under the following conditions: 0.5 mg in 1 mL *i*-PrOH/EtOH 1:1, Chiralpak AD column, hexane/*i*-PrOH 80:20, flow 1 mL/min,  $\lambda$  254 nm,  $t$  (minor) = 8.5 min,  $t$  (major) = 11.2 min.

$^1\text{H}$  NMR (DMSO- $d_6$ , 500 MHz):  $\delta$  8.24 (2H, d,  $J = 9.0$  Hz,  $\text{C}_{\text{ArNO}_2\text{H}}$ ), 8.15 (2H, s,  $\text{C}_{\text{ArCF}_3\text{H}}$ ), 8.08 (1H, s,  $\text{C}_{\text{ArCF}_3\text{H}}$ ), 7.63 (2H, d,  $J = 9.0$  Hz,  $\text{C}_{\text{ArNO}_2\text{H}}$ ), 7.60 (1H, d,  $J = 2.0$  Hz,  $\text{N}=\text{CH}$ ), 5.94 (1H, d,  $J = 7.5$  Hz,  $\text{OCHAr}$ ), 5.41 (2H, s,  $\text{OCH}_2\text{Ar}$ ), 4.81 (1H, dd,  $J = 7.5, 2.0$  Hz,  $\text{NCHCO}_2$ ).

$^{13}\text{C}$  NMR (DMSO- $d_6$ , 125 MHz):  $\delta$  169.5 ( $\text{C}=\text{O}$ ), 156.9 ( $\text{C}=\text{N}$ ), 147.5 ( $\text{C}_{\text{ArNO}_2}$ ), 146.4 ( $\text{C}_{\text{ArNO}_2}$ ), 139.2 ( $\text{C}_{\text{ArCF}_3}$ ), 130.4 ( $\text{C}_{\text{ArCF}_3}$ , q,  $^2J_{\text{CF}} = 33.0$  Hz), 128.7 ( $\text{C}_{\text{ArCF}_3\text{H}}$ , app d,  $^3J_{\text{CF}} = 3.0$  Hz), 127.2 ( $\text{C}_{\text{ArNO}_2\text{H}}$ ), 123.9 ( $\text{C}_{\text{ArNO}_2\text{H}}$ ), 123.3 ( $\text{CF}_3$ , q,  $^1J_{\text{CF}} = 273.0$  Hz), 121.9 ( $\text{C}_{\text{ArCF}_3\text{H}}$ , m), 79.9 ( $\text{OCHAr}$ ), 74.6 ( $\text{NCHCO}_2$ ), 65.2 ( $\text{OCH}_2\text{Ar}$ ).

$^{19}\text{F}$  NMR (DMSO- $d_6$ , 470.6 MHz):  $\delta$  -61.3.

HRMS (ESI, MeOH): calcd. for  $[\text{M}+\text{H}]^+$  ( $\text{C}_{19}\text{H}_{13}\text{F}_6\text{N}_2\text{O}_5$ ) 463.0723, found 463.0713.

IR: 1749 (w), 1712 (m,  $\text{C}=\text{O}$  stretch), 1628 (w,  $\text{C}=\text{N}$  stretch), 1526 (m), 1349 (m), 1278 (s), 1222 (m), 1172 (s), 1131 (s), 1108 (s), 890 (w), 843 (m), 705 (m), 602 (m).

$[\alpha]_{\text{D}}^{20}$ : +135 (c 0.29, AcOEt, sample with 84% ee).

### Diphenylmethyl (4S,5R)-5-(4-nitrophenyl)-4,5-dihydro-1,3-oxazole-4-carboxylate (**6f**)

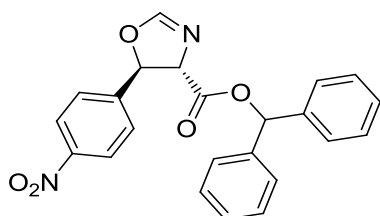

Obtained according to general procedure B, using **L-2** (7.7 mg, 0.0125 mmol, 0.05 eq) and isocyanoacetate **7f** (62.8 mg, 0.250 mmol, 1.0 eq). The crude mixture was purified by FCC (from PE/AcOEt 4:1 to PE/AcOEt 3:1) obtaining the title compound (4S,5R)-**6f** as an off-white solid (78.4 mg, 78%).

Enantiomeric excess (89% ee) was determined by chiral HPLC analysis under the following conditions: 0.5 mg in 1 mL *i*-PrOH/EtOH 1:1, Chiralpak OD column, hexane/*i*-PrOH 85:15, flow 1.0 mL/min,  $\lambda$  254 nm,  $t$  (major) = 26.1 min,  $t$  (minor) = 31.6 min.

$^1\text{H}$  NMR (DMSO- $d_6$ , 400 MHz):  $\delta$  8.27 (2H, d,  $J = 8.5$  Hz,  $\text{C}_{\text{ArNO}_2\text{H}}$ ), 7.62-7.60 (3H, m,  $\text{C}_{\text{ArNO}_2\text{H}}$  and  $\text{N}=\text{CH}$ ), 7.45-7.30 (10H, m, Ph), 6.90 (1H, s,  $\text{OCHPh}_2$ ), 5.87 (1H, d,  $J = 7.5$  Hz,  $\text{OCHAr}$ ), 4.86 (1H, dd,  $J = 7.5, 2.0$  Hz,  $\text{NCHCO}_2$ ).

$^{13}\text{C}$  NMR (DMSO- $d_6$ , 100 MHz):  $\delta$  168.8 ( $\text{C}=\text{O}$ ), 156.9 ( $\text{C}=\text{N}$ ), 147.5 ( $\text{C}_{\text{ArNO}_2}$ ), 146.3 ( $\text{C}_{\text{ArNO}_2}$ ), 140.0 ( $\text{C}_{\text{Ar}}$ ), 139.9 ( $\text{C}_{\text{Ar}}$ ), 128.6 ( $\text{C}_{\text{ArH}}$ ), 128.5 ( $\text{C}_{\text{ArH}}$ ), 128.0 ( $\text{C}_{\text{ArH}}$ ), 127.9 ( $\text{C}_{\text{ArH}}$ ), 127.2 ( $\text{C}_{\text{ArH}}$ ), 126.7 ( $\text{C}_{\text{ArH}}$ ), 126.4 ( $\text{C}_{\text{ArNO}_2\text{H}}$ ), 124.0 ( $\text{C}_{\text{ArNO}_2\text{H}}$ ), 80.0 ( $\text{OCHAr}$ ), 77.7 ( $\text{OCHPh}_2$ ), 74.8 ( $\text{NCHCO}_2$ ).

HRMS (ESI, MeOH): calcd. for  $[\text{M}+\text{Na}]^+$  ( $\text{C}_{23}\text{H}_{18}\text{N}_2\text{NaO}_5$ ) 425.1108, found 425.1114.

M.p.: 39-41 °C.

IR: 1737 (m,  $\text{C}=\text{O}$  stretch), 1627 (m,  $\text{C}=\text{N}$  stretch), 1606 (w), 1522 (s), 1496 (w), 1454 (w), 1347 (s), 1222 (m), 1176 (s), 971 (m), 850 (m), 836 (m), 748 (m), 697 (s), 647 (w).

$[\alpha]_{\text{D}}^{20}$ : +152 (c 0.37, AcOEt, sample with 89% ee).

### Diphenylmethyl (4R,5S)-5-(4-nitrophenyl)-4,5-dihydro-1,3-oxazole-4-carboxylate (**6f**)

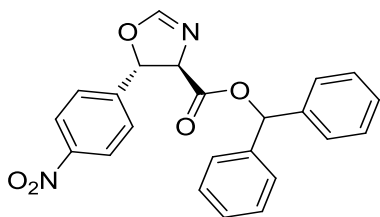

Obtained according to general procedure B using **L-4** (7.7 mg, 0.0125 mmol, 0.05 eq) and isocyanoacetate **7f** (62.8 mg, 0.250 mmol, 1.0 eq), then purified by FCC (from PE/AcOEt 4:1 to PE/AcOEt 3:1) obtaining (4R,5S)-**6f** as an off-white solid (68.4 mg, 68%).

Enantiomeric excess (93% ee) was determined by chiral HPLC analysis under the following conditions: 0.5 mg in 1 mL *i*-PrOH/EtOH 1:1, Chiralpak OD column, hexane/*i*-PrOH 85:15, flow 1 mL/min,  $\lambda$  254 nm,  $t$  (minor) = 27.6 min,  $t$  (major) = 31.5 min.

$[\alpha]_{\text{D}}^{25}$ : -156 (c 0.37, AcOEt, sample with 93% ee).

## 2.5. Synthesis and characterisation of 5

### Diphenylmethyl (2*S*,3*R*)-2-amino-3-hydroxy-3-(4-nitrophenyl)propanoate (2*S*,3*R*)-(5)

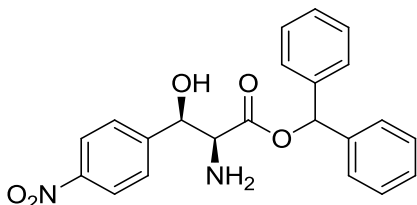

A solution of oxazoline (4*S*,5*R*)-**6f** (683 mg, 1.70 mmol, 1.0 eq) in MeOH (12 mL) was cooled to 0 °C. A solution of thionyl chloride (862 μL, 11.9 mmol, 7.0 eq) in MeOH (12 mL) was cooled to 0 °C and then added dropwise to the reaction flask. The resulting mixture was stirred at 0 °C for 1.5 hours, then quenched

by addition of solid NaHCO<sub>3</sub>. Volatiles were removed under reduced pressure and the residue was taken up in CH<sub>2</sub>Cl<sub>2</sub> and water. The phases were separated and the aqueous layer was extracted with CH<sub>2</sub>Cl<sub>2</sub> three times. The combined organic phases were washed with brine, dried over Na<sub>2</sub>SO<sub>4</sub>, filtered and evaporated to obtain a brown oil. Purification of the crude mixture by FCC (PE/AcOEt 3:2 to 1:2) gave the title compound (2*S*,3*R*)-**5** as a pale yellow solid (499 mg, 75%).

Crystallisation was performed as follow. Compound **5** (150.0 mg, 90% ee) was dissolved in toluene (1 mL) at 100 °C, then slowly allowed to cool down to rt. The resulting solution was left for 16 h at 0 °C, then for 4 days at -20 °C, during which a white solid formed. Toluene was removed with a pipette, then the solid was washed with toluene at rt (3 × 1 mL), each time decanting the solvent off. The solid was then dried (92.0 mg, 61% crystallisation yield, 98% ee).

Enantiomeric excess was determined by chiral HPLC analysis under the following conditions: 0.5 mg in 1 mL *i*-PrOH/EtOH 1:1, Chiralpak AD column, hexane/*i*-PrOH 70:30, flow 0.8 mL/min, λ 220 nm, t (major) = 12.4 min, t (minor) = 15.3 min.

<sup>1</sup>H NMR (DMSO-d<sub>6</sub>, 400 MHz): δ 8.10 (2H, d, *J* = 8.5 Hz, C<sub>Ar</sub>NO<sub>2</sub>H), 7.60 (2H, d, *J* = 8.5 Hz, C<sub>Ar</sub>NO<sub>2</sub>H), 7.45-7.22 (10H, m, Ph), 6.77 (1H, s, CHPh<sub>2</sub>), 5.93 (1H, d, *J* = 5.0 Hz, OH), 5.06 (1H, t, *J* = 4.5 Hz, ArCHOH), 3.70 (1H, d, *J* = 4.0 Hz, CHNH<sub>2</sub>), 1.79 (2H, br s, NH<sub>2</sub>).

<sup>13</sup>C NMR (DMSO-d<sub>6</sub>, 100 MHz): δ 172.4 (C=O), 150.7 (C<sub>Ar</sub>NO<sub>2</sub>), 146.5 (C<sub>Ar</sub>NO<sub>2</sub>), 140.6 (C<sub>Ar</sub>), 140.4 (C<sub>Ar</sub>), 128.5 (C<sub>Ar</sub>H), 128.3 (C<sub>Ar</sub>H), 127.8 (C<sub>Ar</sub>H), 127.6 (C<sub>Ar</sub>H), 126.7 (C<sub>Ar</sub>H), 126.4 (C<sub>Ar</sub>NO<sub>2</sub>H), 122.8 (C<sub>Ar</sub>NO<sub>2</sub>H), 76.7 (CHPh<sub>2</sub>), 73.7 (ArCHOH), 60.8 (CHNH<sub>2</sub>).

HRMS (ESI, MeOH): calcd. for [M+H]<sup>+</sup> (C<sub>22</sub>H<sub>21</sub>N<sub>2</sub>O<sub>5</sub>) 393.1445, found 393.1434.

M.p.: 116-118 °C.

IR: 2923 (w, br), 1716 (m, C=O stretch), 1600 (w), 1513 (m) 1345 (m), 1224 (m), 1197 (m), 998 (w), 920 (w), 771 (m), 742 (m), 701 (s).

[α]<sub>D</sub><sup>20</sup>: +22 (c 0.20, AcOEt, sample with 89% ee).

### Diphenylmethyl (2*R*,3*S*)-2-amino-3-hydroxy-3-(4-nitrophenyl)propanoate (2*R*,3*S*)-(5)

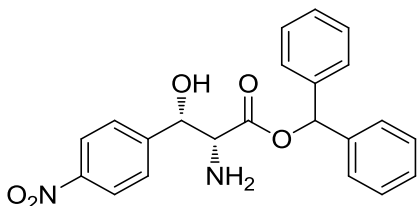

Synthesized and purified in an identical fashion starting from (4*R*,5*S*)-**6f**. The title compound (2*R*,3*S*)-**5** was obtained as an off-white solid (76%) and was not crystallised. Enantiomeric excess (94%) was determined by chiral HPLC analysis under the following conditions: 0.5 mg in 1 mL *i*-PrOH/EtOH 1:1, Chiralpak AD column, hexane/*i*-PrOH 70:30, flow 0.8 mL/min,

λ 220 nm, t (minor) = 12.6 min, t (major) = 15.6 min.

[α]<sub>D</sub><sup>25</sup>: -31 (c 0.20, AcOEt, sample with 94% ee).

(±)-**5** was prepared in an identical fashion from (±)-**6f**.

## 2.6. Synthesis and characterisation of 9

### Diphenylmethyl (2*S*,3*R*)-2-(2,2-dichloroacetamido)-3-hydroxy-3-(4-nitrophenyl)propanoate (2*S*,3*R*)-**9**

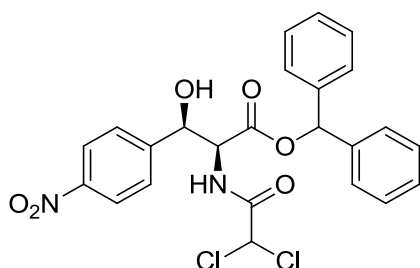

Dichloroacetyl chloride (25  $\mu$ L, 0.25 mmol, 1.1 eq) was added dropwise to a stirred solution of (2*S*,3*R*)-**5** (90.0 mg, 0.223 mmol, 1.0 eq) and Et<sub>3</sub>N (35  $\mu$ L, 0.25 mmol, 1.1 eq) in CH<sub>2</sub>Cl<sub>2</sub> (2.5 mL) at 0 °C. The reaction mixture was stirred at rt for 16 hours, then saturated NaHCO<sub>3</sub> aqueous solution (5 mL) was added. The phases were separated and the aqueous layer was extracted with CH<sub>2</sub>Cl<sub>2</sub> (3  $\times$  5 mL). The combined organic phases

were washed with brine, dried over Na<sub>2</sub>SO<sub>4</sub>, filtered and evaporated. Purification of the crude mixture by FCC (PE/AcOEt 7:3) afforded the title compound (2*S*,3*R*)-**9** as a pale yellow solid (93.2 mg, 83%).

Enantiomeric excess (98% ee) was determined by chiral HPLC analysis under the following conditions: 0.5 mg in 1 mL *i*-PrOH/EtOH 1:1, Chiralpak AD column, hexane/*i*-PrOH 70:30, flow 0.8 mL/min,  $\lambda$  220 nm, t (minor) = 20.1 min, t (major) = 26.5 min.

<sup>1</sup>H NMR (DMSO-*d*<sub>6</sub>, 400 MHz):  $\delta$  9.10 (1H, d,  $J$  = 9.0 Hz, NH), 8.15 (2H, d,  $J$  = 9.0 Hz, C<sub>Ar</sub>NO<sub>2</sub>H), 7.72 (2H, d,  $J$  = 9.0 Hz, C<sub>Ar</sub>NO<sub>2</sub>H), 7.50-7.22 (10H, m, Ph), 6.86 (1H, s, CHPh<sub>2</sub>), 6.59 (1H, s, CHCl<sub>2</sub>), 6.50 (1H, d,  $J$  = 4.5 Hz, OH), 5.49 (1H, t,  $J$  = 4.0 Hz, ArCHOH), 4.89 (1H, dd,  $J$  = 9.0, 3.0 Hz, CHNH).

<sup>13</sup>C NMR (DMSO-*d*<sub>6</sub>, 100 MHz):  $\delta$  168.0 (CO<sub>2</sub>), 163.9 (CONH), 149.0 (C<sub>Ar</sub>NO<sub>2</sub>), 146.8 (C<sub>Ar</sub>NO<sub>2</sub>), 140.3 (C<sub>Ar</sub>), 140.2 (C<sub>Ar</sub>), 128.5 (C<sub>Ar</sub>H), 128.4 (C<sub>Ar</sub>H), 127.9 (C<sub>Ar</sub>H), 127.7 (C<sub>Ar</sub>H), 127.6 (C<sub>Ar</sub>H), 126.6 (C<sub>Ar</sub>H), 126.3 (C<sub>Ar</sub>NO<sub>2</sub>H), 123.0 (C<sub>Ar</sub>NO<sub>2</sub>H), 77.6 (CHPh<sub>2</sub>), 71.2 (ArCHOH), 65.8 (CHCl<sub>2</sub>), 58.4 (CHNH).

HRMS (ESI, MeOH): calcd. for [M+Na]<sup>+</sup> (C<sub>24</sub>H<sub>20</sub>Cl<sub>2</sub>N<sub>2</sub>NaO<sub>6</sub>) 525.0591, found 525.0588.

M.p.: 130-136 °C.

IR: 3552 (w, br), 3332 (m, br), 2854 (w), 1741 (s, OC=O stretch), 1683 (s, NC=O stretch), 1543 (m), 1506 (s), 1454 (w), 1344 (s), 1299 (m), 1274 (m), 1203 (s), 1107 (m), 1068 (m), 1013 (w), 974 (w), 954 (w), 852 (w), 812 (m), 758 (s), 696 (s).

$[\alpha]_D^{25}$ : -0.85 (c 1.00, AcOEt, sample with 87% ee).

### Diphenylmethyl (2*R*,3*S*)-2-(2,2-dichloroacetamido)-3-hydroxy-3-(4-nitrophenyl)propanoate (2*R*,3*S*)-**9**

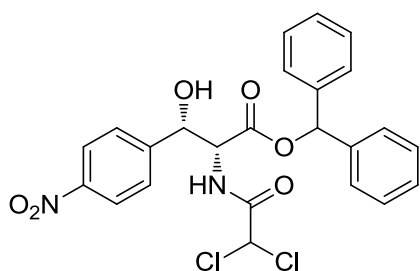

Synthesized and purified in identical fashion starting from (2*R*,3*S*)-**5**. The title compound (2*R*,3*S*)-**9** was obtained as pale yellow solid (82%). Enantiomeric excess (93% ee) was determined by chiral HPLC analysis under the following conditions: 0.5 mg in 1 mL *i*-PrOH/EtOH 1:1, Chiralpak AD column, hexane/*i*-PrOH 70:30, flow 0.8 mL/min,  $\lambda$  220 nm, t (major) = 20.3 min, t (minor) = 26.9 min.

$[\alpha]_D^{25}$ : +0.84 (c 1.00, AcOEt, sample with 93% ee).

( $\pm$ )-**9** was prepared in an identical fashion from ( $\pm$ )-**5**.

## 2.7. Synthesis and characterisation of (-)-chloramphenicol and (+)chloramphenicol (1)

### (-)-Chloramphenicol

#### 2,2-Dichloro-*N*-[(1*R*,2*R*)-1,3-dihydroxy-1-(4-nitrophenyl)propan-2-yl]acetamide (-)-(1)

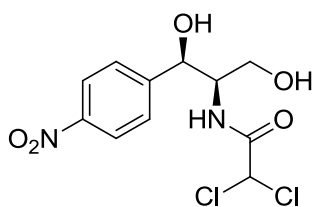

Sodium borohydride (28.2 mg, 0.745 mmol, 5.0 eq) was added in one portion to a stirred suspension of (2*S*,3*R*)-**9** (75.0 mg, 0.149 mmol, 1.0 eq) in methanol (0.8 mL) at 0 °C. The reaction mixture was stirred at 0 °C for 1 hour, then quenched by adding H<sub>2</sub>O (15 mL). AcOEt (15 mL) was added and the phases separated. The aqueous layer was extracted with AcOEt (3 × 10 mL). The combined organic phases were dried over Na<sub>2</sub>SO<sub>4</sub>, filtered and evaporated. Purification of the crude mixture by FCC (PE/AcOEt 3:7 to 2:8) afforded the title compound (-)-**1** as a pale yellow solid (38.5 mg, 80%).

Enantiomeric excess (99%) was determined by chiral HPLC analysis under the following conditions: 0.5 mg in 1 mL *i*-PrOH/EtOH 1:1, Chiralpak AD-H column, hexane/*i*-PrOH 90:10, flow 1.0 mL/min, λ 220 nm, t (major) = 11.5 min, t (minor) = 19.7 min.

Spectroscopic data are in agreement with those reported in the literature.<sup>12,13</sup>

<sup>1</sup>H NMR (acetone-*d*<sub>6</sub>, 500 MHz): δ 8.19 (2H, d, *J* = 9.0 Hz, C<sub>Ar</sub>NO<sub>2</sub>H), 7.71 (2H, d, *J* = 8.5 Hz, C<sub>Ar</sub>NO<sub>2</sub>H), 7.52 (1H, d, *J* = 8.0 Hz, NH), 6.36 (1H, s, CHCl<sub>2</sub>), 5.34 (1H, m, ArCHOH), 5.23 (1H, d, *J* = 4.5 Hz, ArCHOH), 4.25 (1H, dd, *J* = 6.0, 5.0 Hz, CH<sub>2</sub>OH), 4.17 (1H, m, CHNH), 3.81 (1H, app dt, *J* = 10.5, 6.5 Hz, CH<sub>A</sub>H<sub>B</sub>OH), 3.71 (1H, app dt, *J* = 10.5, 5.0 Hz, CH<sub>A</sub>H<sub>B</sub>OH).

<sup>13</sup>C-NMR (acetone-*d*<sub>6</sub>, 125 MHz): δ 164.4 (C=O), 151.4 (C<sub>Ar</sub>NO<sub>2</sub>), 148.1 (C<sub>Ar</sub>NO<sub>2</sub>), 128.2 (C<sub>Ar</sub>NO<sub>2</sub>H), 123.9 (C<sub>Ar</sub>NO<sub>2</sub>H), 71.2 (ArCHOH), 67.5 (CHCl<sub>2</sub>), 62.2 (CH<sub>2</sub>OH), 57.9 (CHNH).

M.p.: 150-151 °C. Lit.: 149.7-150.7 °C;<sup>14</sup> 150-151 °C;<sup>15</sup> 150.5-151.5 °C.<sup>16</sup>

[α]<sub>D</sub><sup>25</sup>: -25.1 (c 1.00, AcOEt, sample with 99% ee). Lit.: [α]<sub>D</sub><sup>23</sup> = -25.5 (c = 1, AcOEt).<sup>14</sup>

### (+)-Chloramphenicol

#### 2,2-Dichloro-*N*-[(1*S*,2*S*)-1,3-dihydroxy-1-(4-nitrophenyl)propan-2-yl]acetamide (+)-(1)

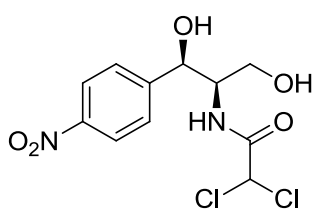

The enantiomer (+)-**1** was prepared from (2*R*,3*S*)-**9** in identical fashion, obtaining a pale yellow solid (80%). Enantiomeric excess (96%) was determined by chiral HPLC analysis under the following conditions: 0.5 mg in 1 mL *i*-PrOH/EtOH 1:1, Chiralpak AD-H column, hexane/*i*-PrOH 90:10, flow 1.0 mL/min, λ 220 nm, t (minor) = 11.8 min, t (major) = 18.8 min. [α]<sub>D</sub><sup>25</sup>: +24.4 (c 1.00, AcOEt, sample with 96% ee).

(±)-**1** was prepared mixing equimolar quantities (1.0 mg) of the two enantiomers.



### 3. $^1\text{H}$ and $^{13}\text{C}$ NMR spectra

#### (4-Methoxyphenyl)methyl 2-formamidoacetate (10d)

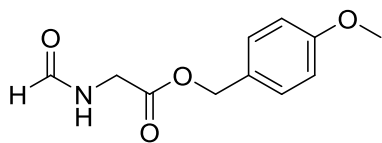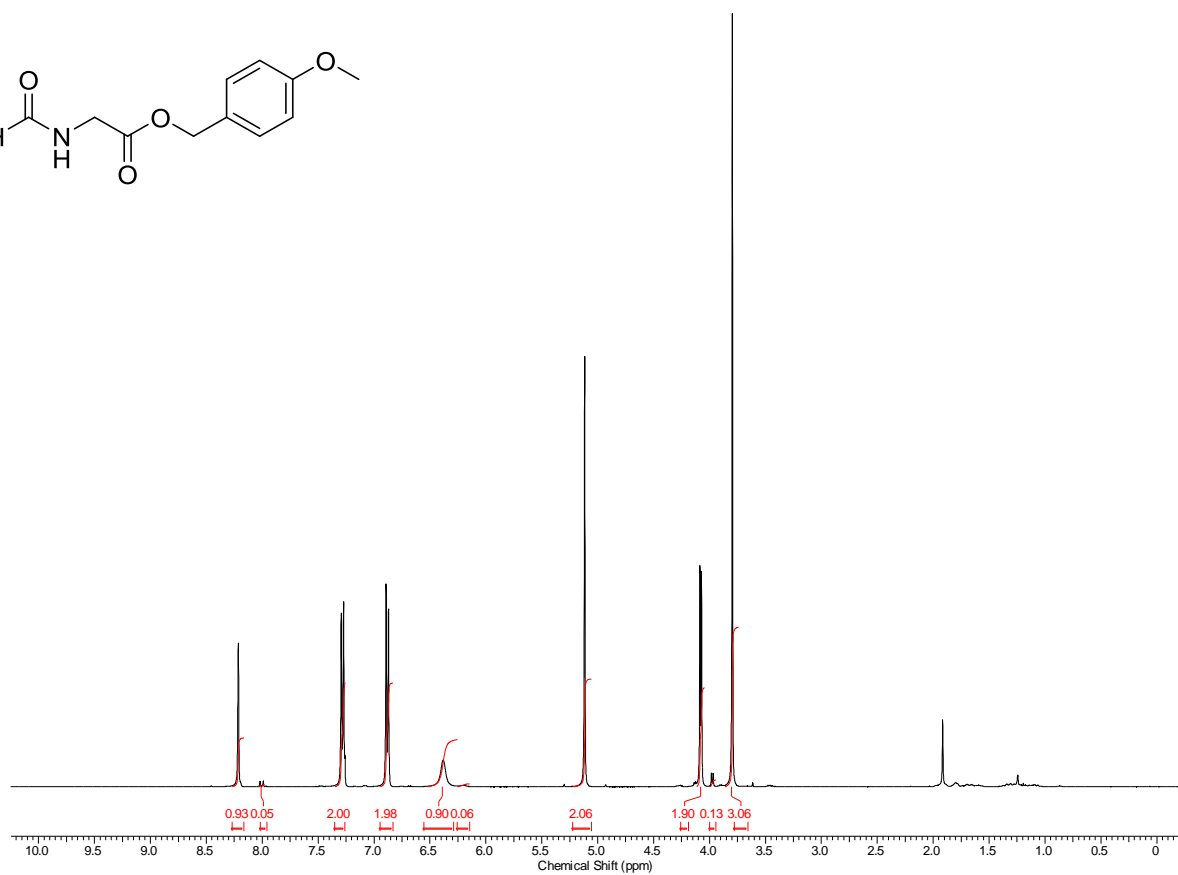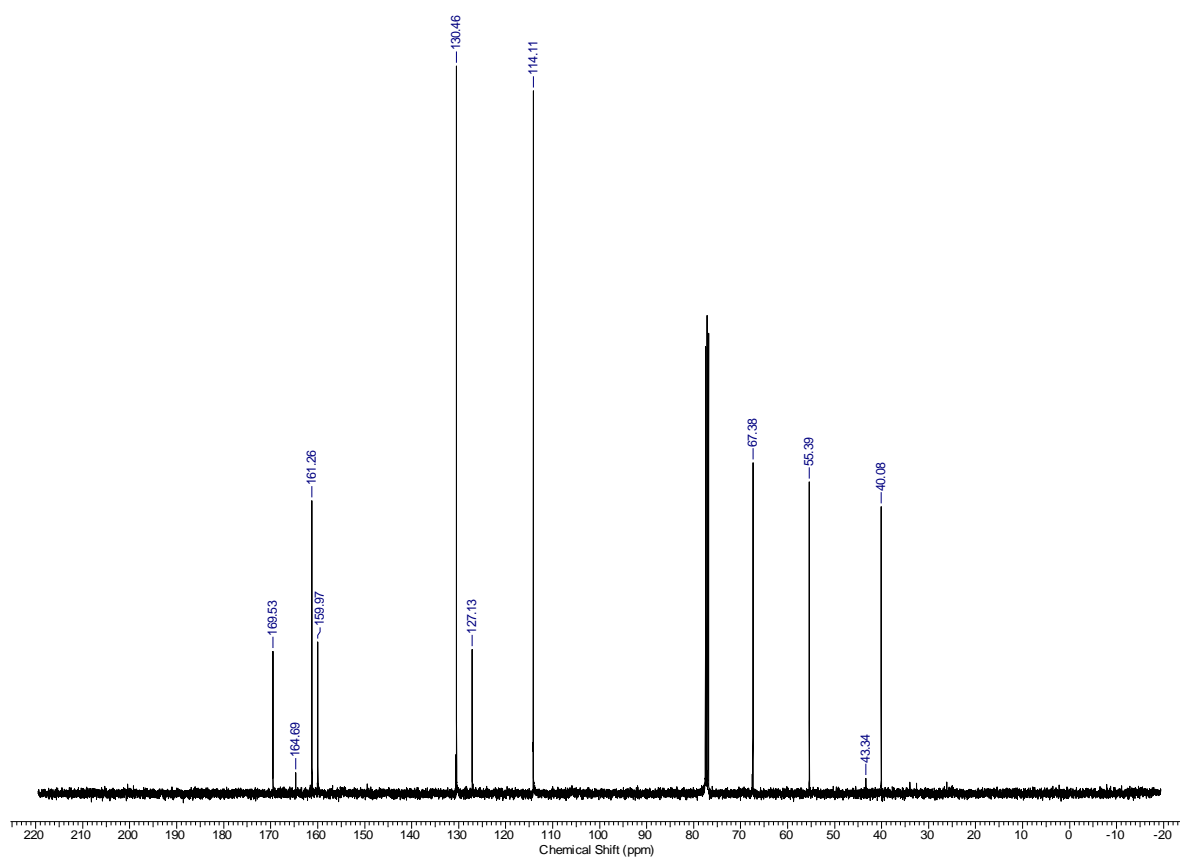

**[3,5-Bis(trifluoromethyl)phenyl]methyl 2-formamidoacetate (10e)**

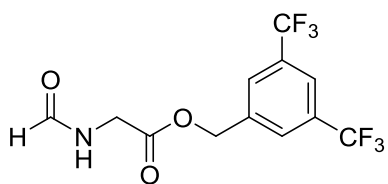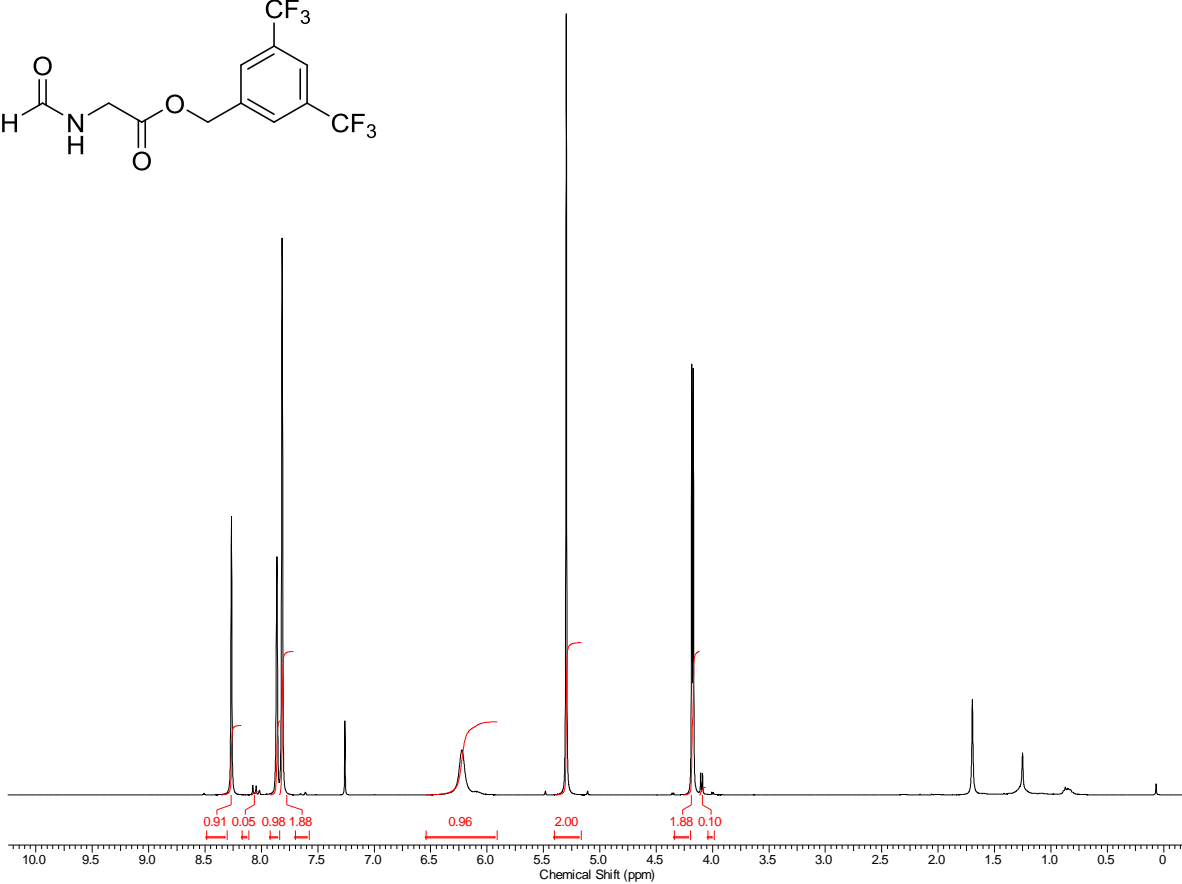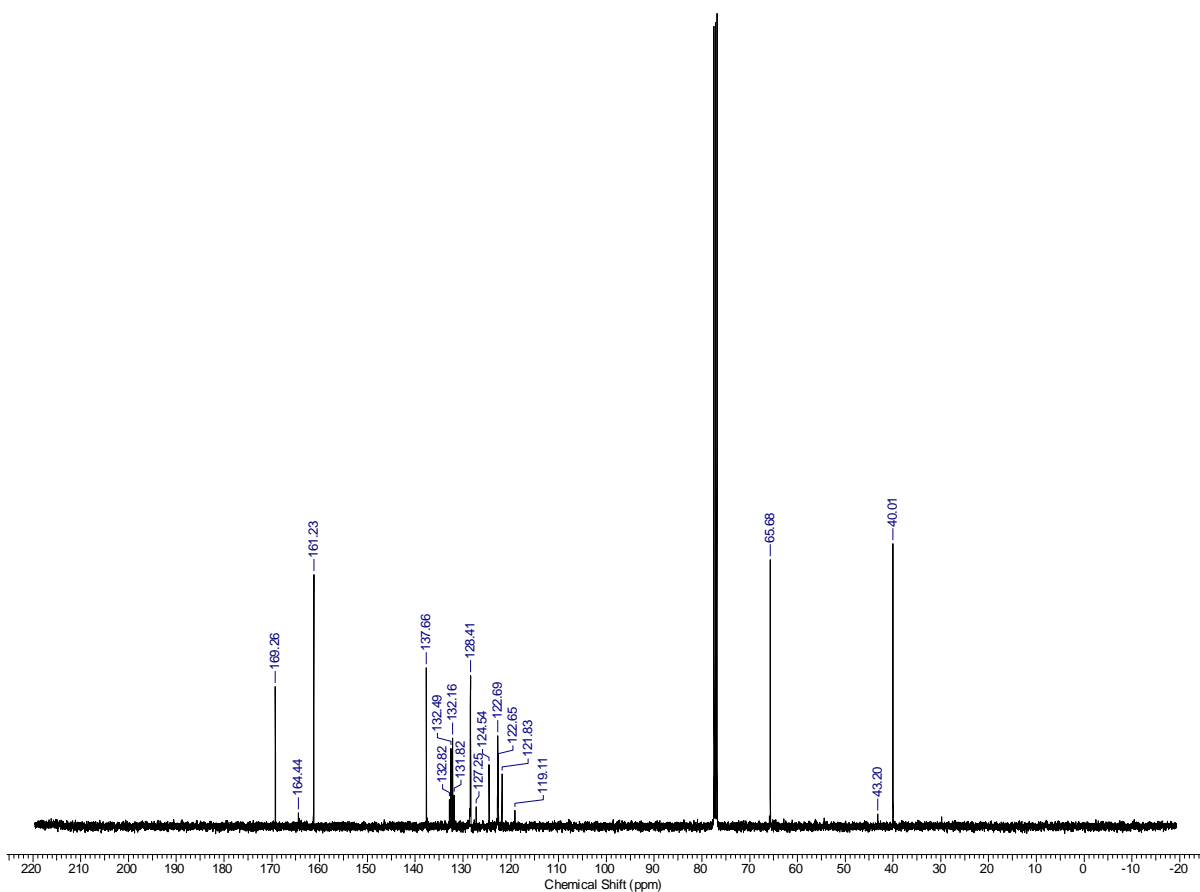

(4-Methoxyphenyl)methyl 2-isocyanoacetate (7d)

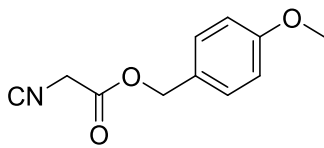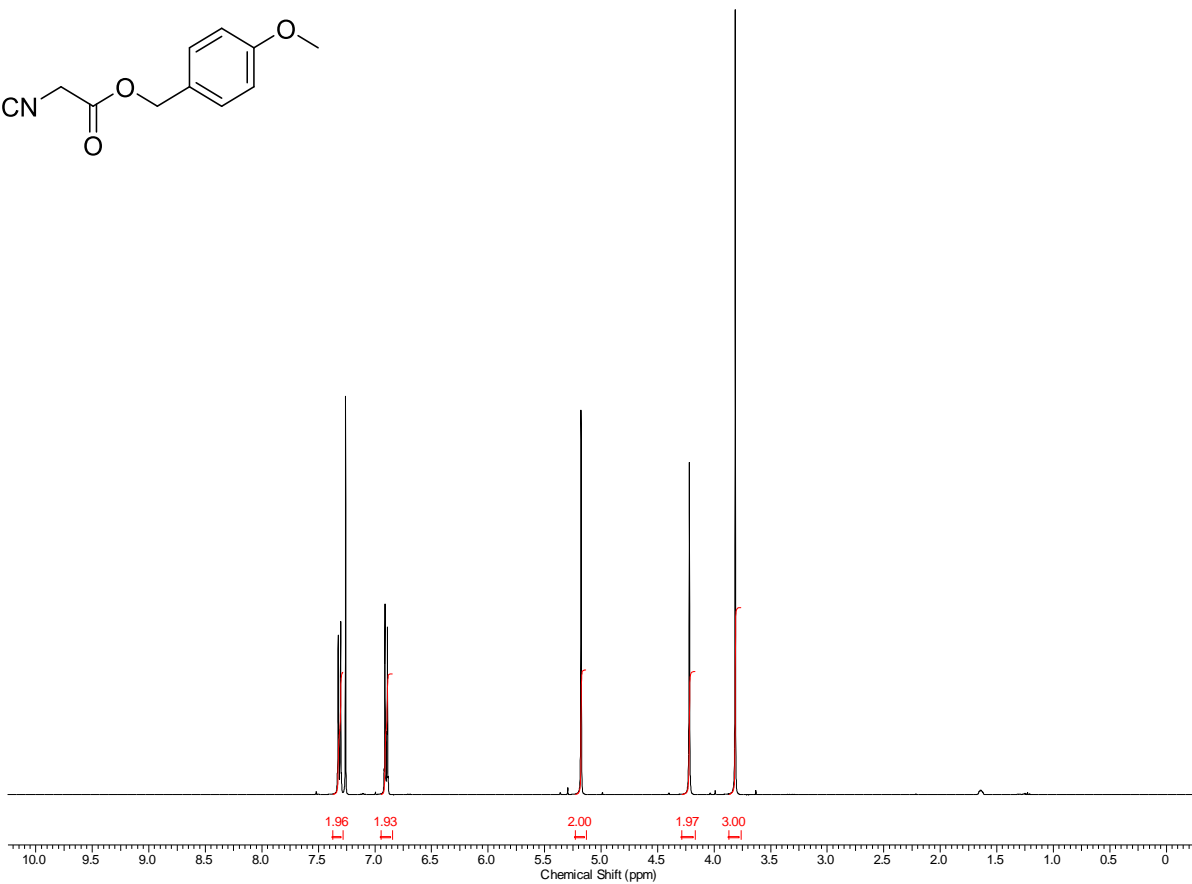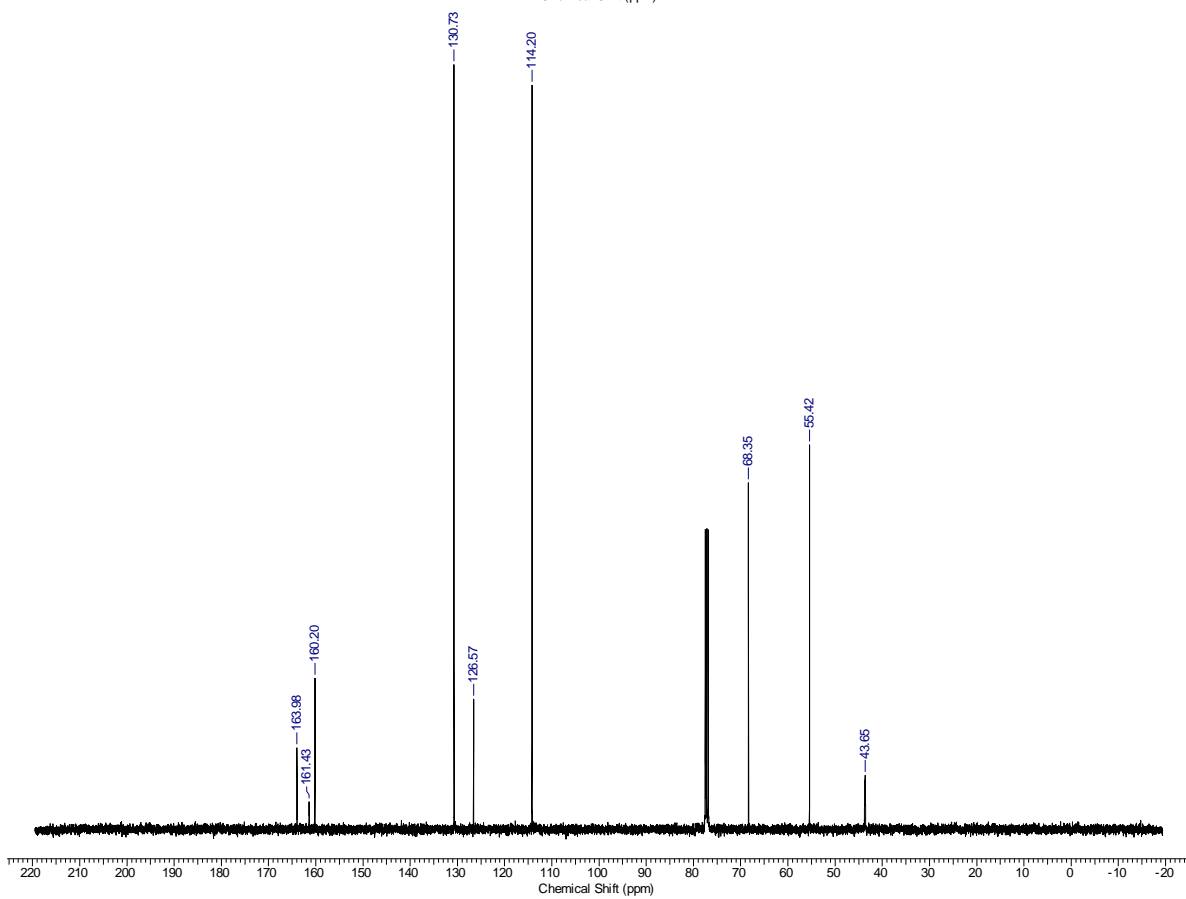

[3,5-Bis(trifluoromethyl)phenyl]methyl 2-isocyanoacetate (7e)

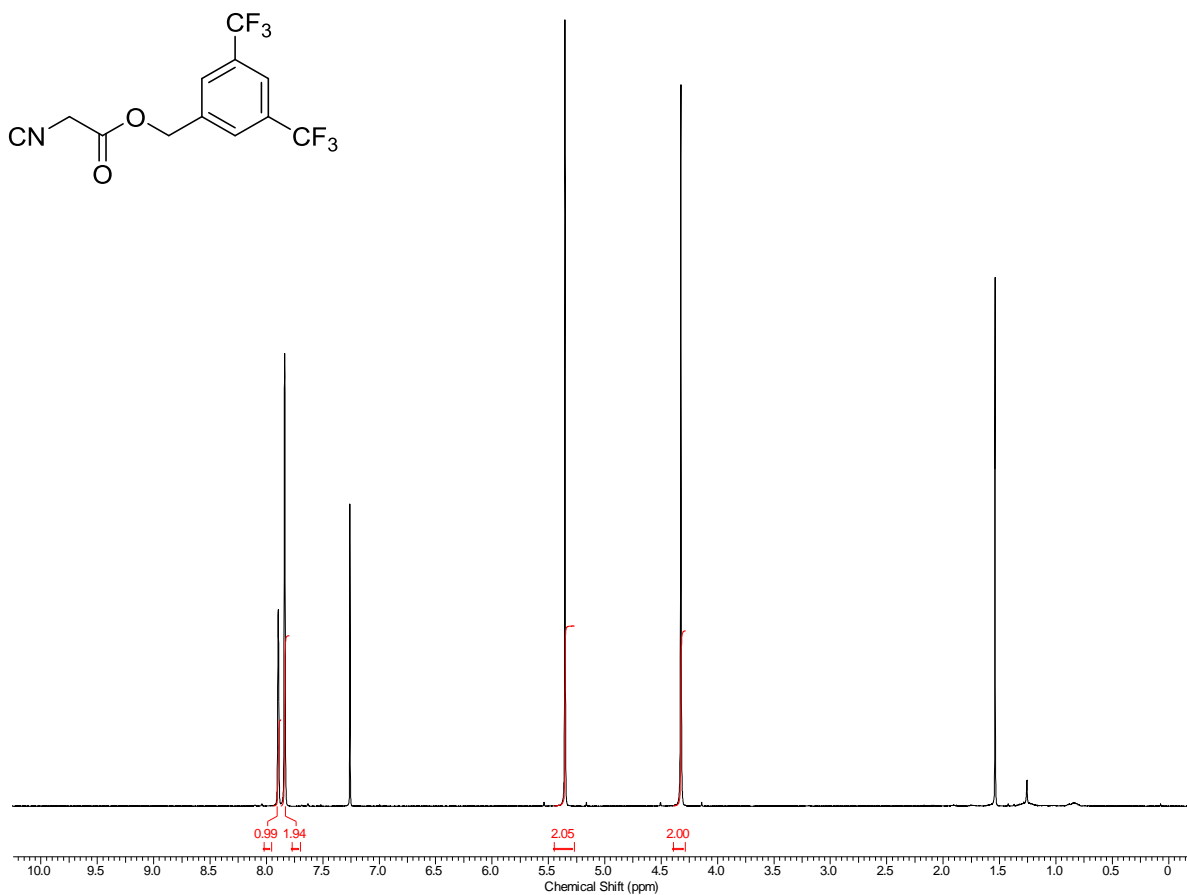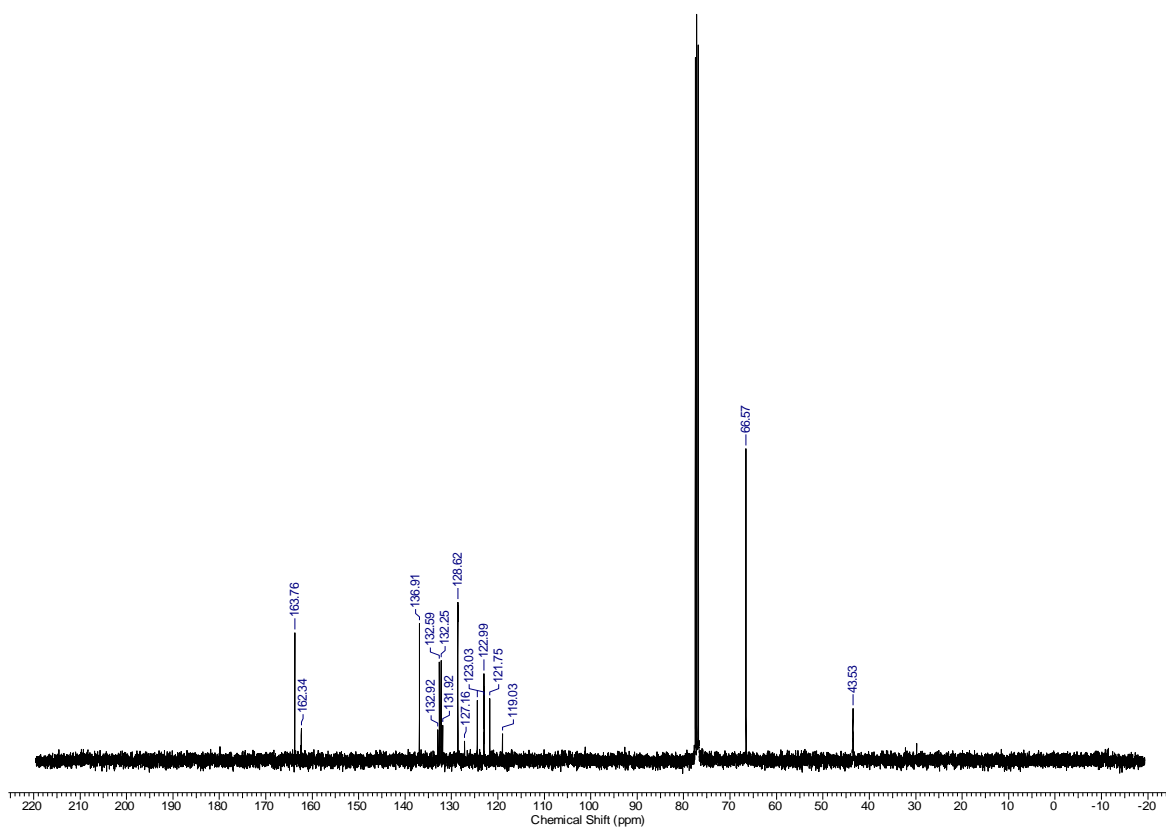

***tert*-Butyl (4*S*,5*R*)-5-(4-nitrophenyl)-4,5-dihydro-1,3-oxazole-4-carboxylate (6a)**

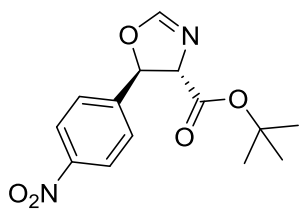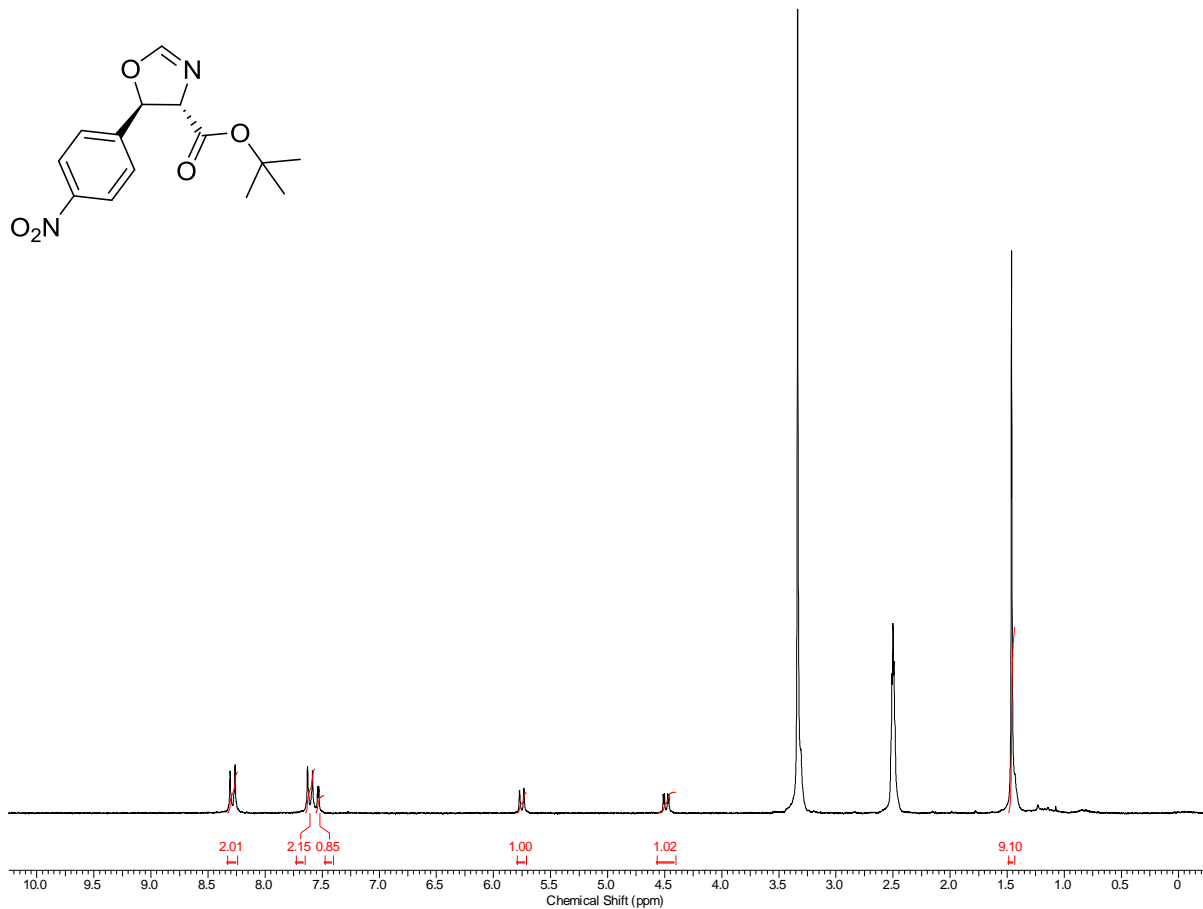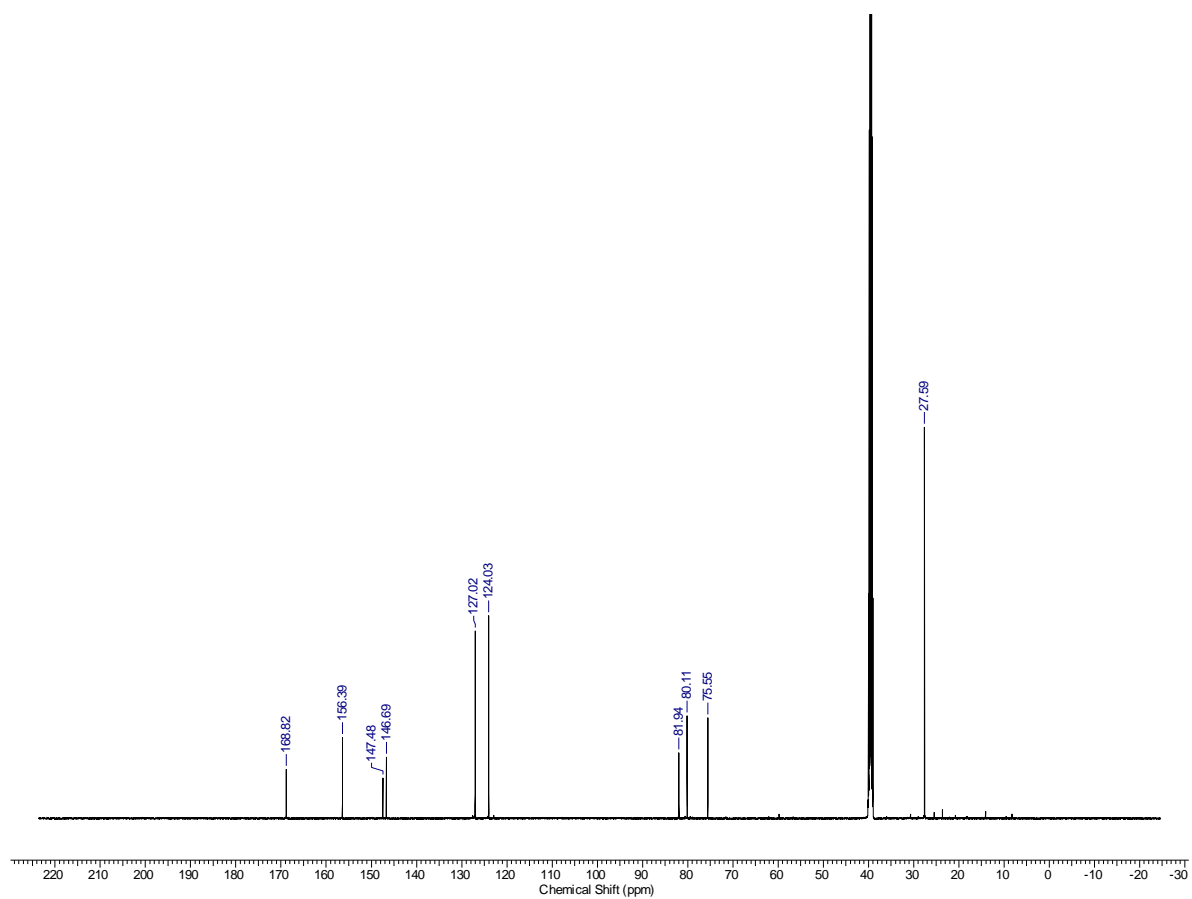

**Methyl (4*S*,5*R*)-5-(4-nitrophenyl)-4,5-dihydro-1,3-oxazole-4-carboxylate (6b)**

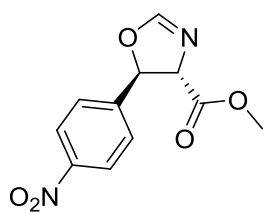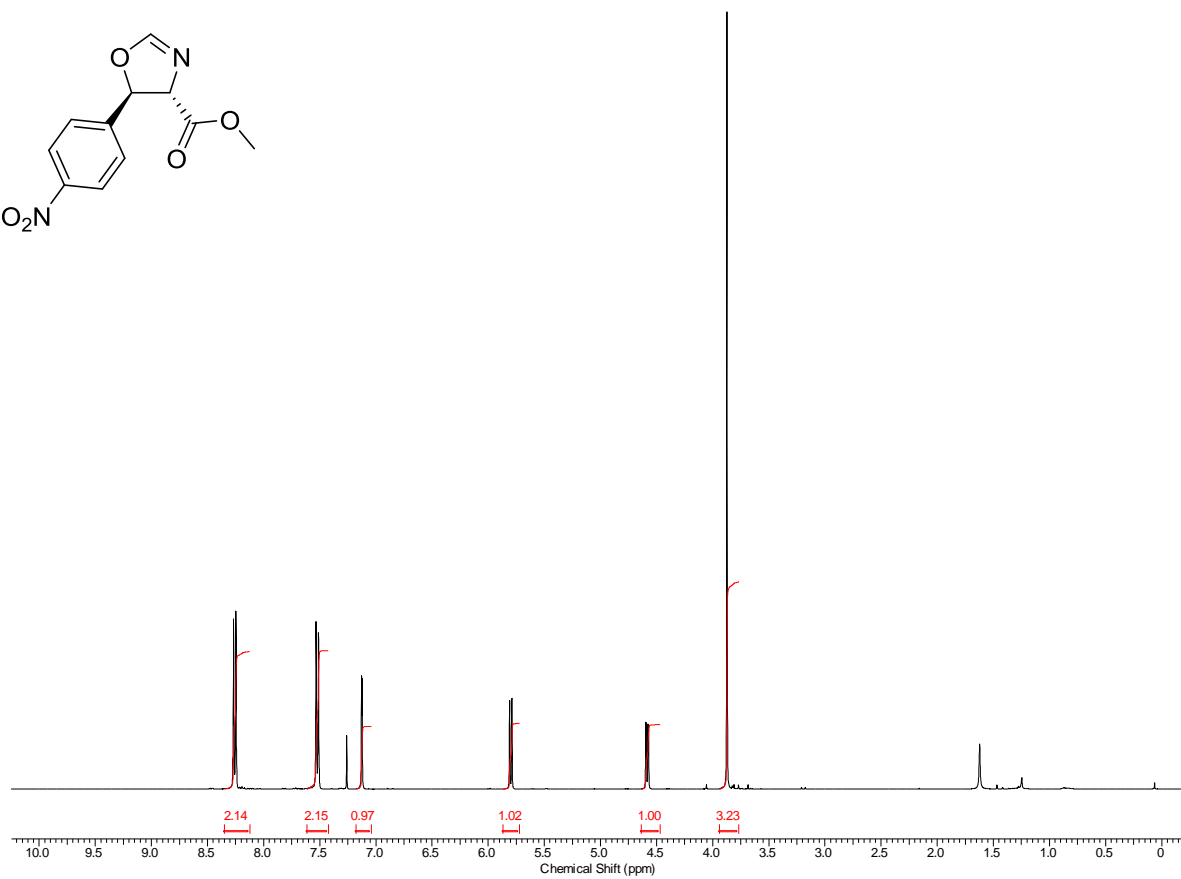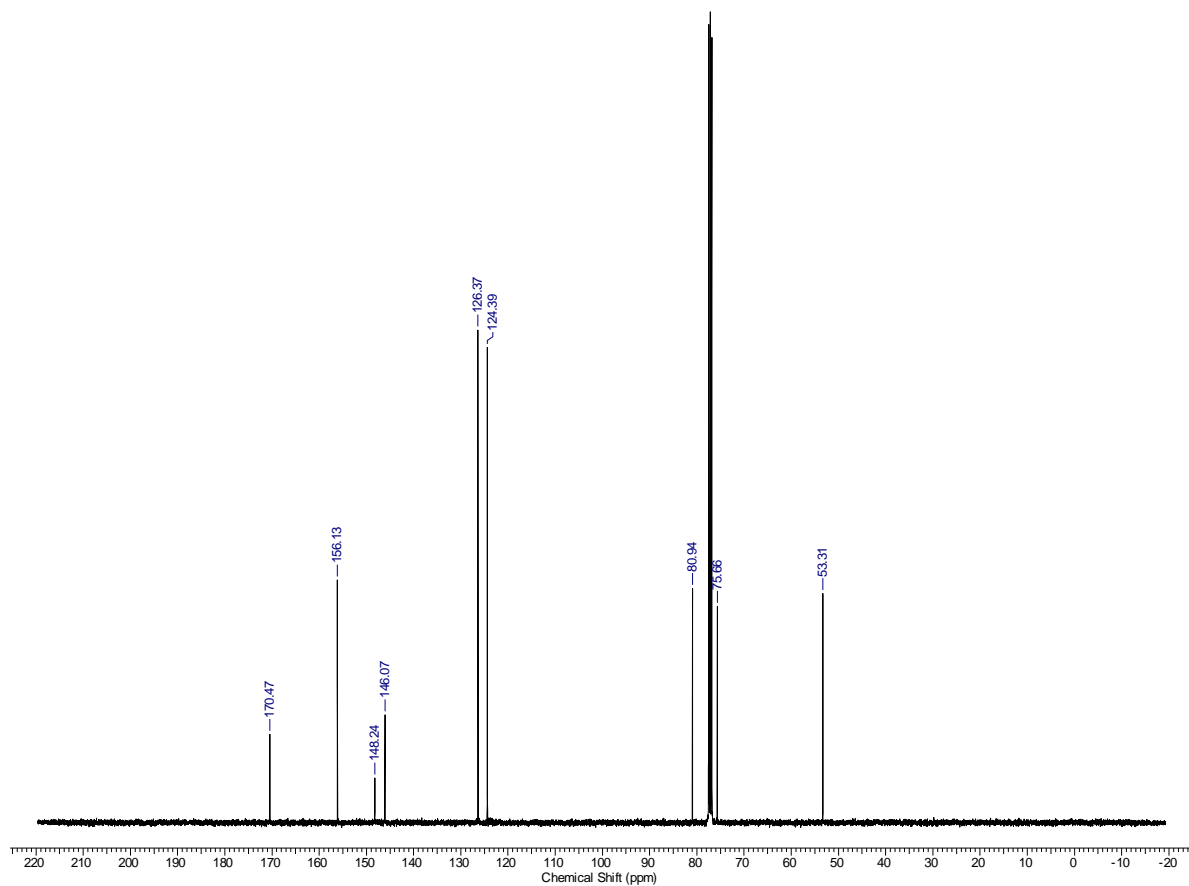

**Benzyl (4*S*,5*R*)-5-(4-nitrophenyl)-4,5-dihydro-1,3-oxazole-4-carboxylate (6c)**

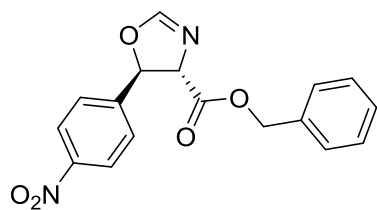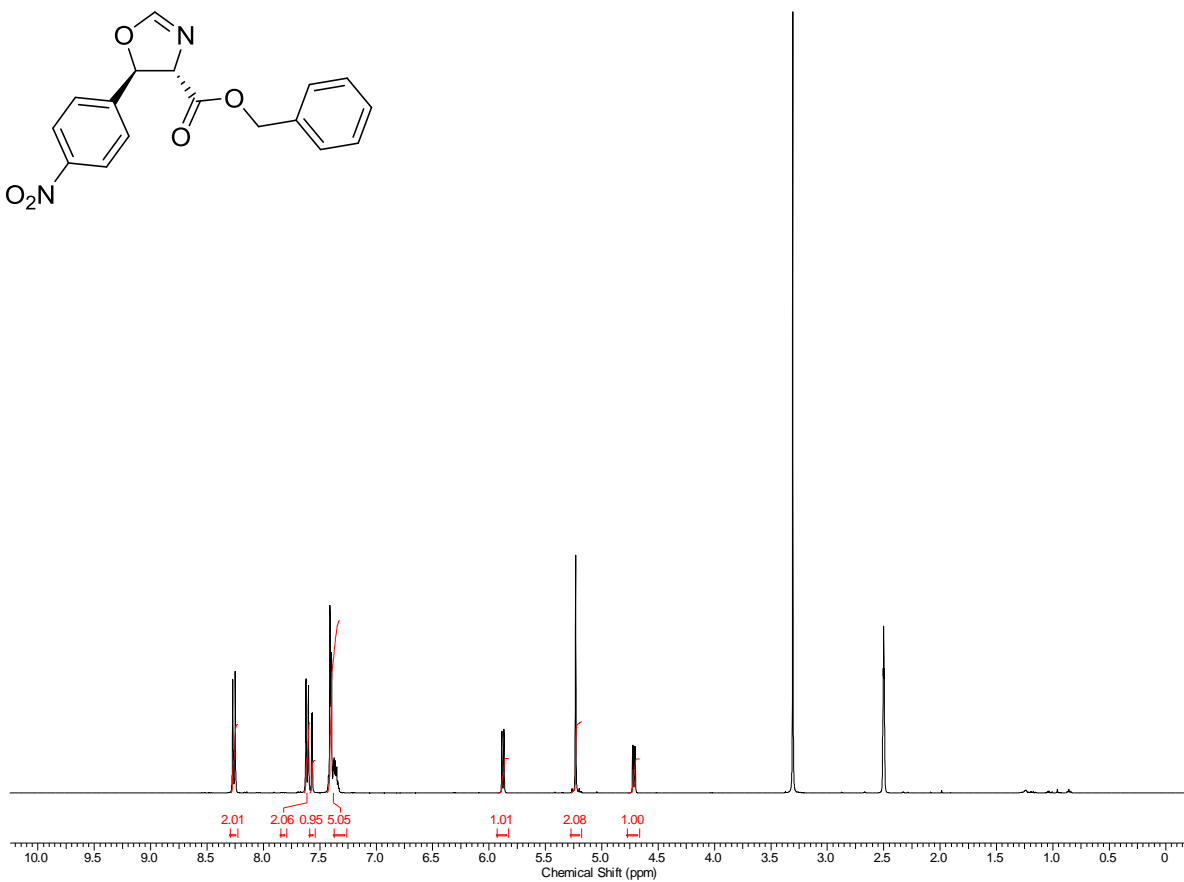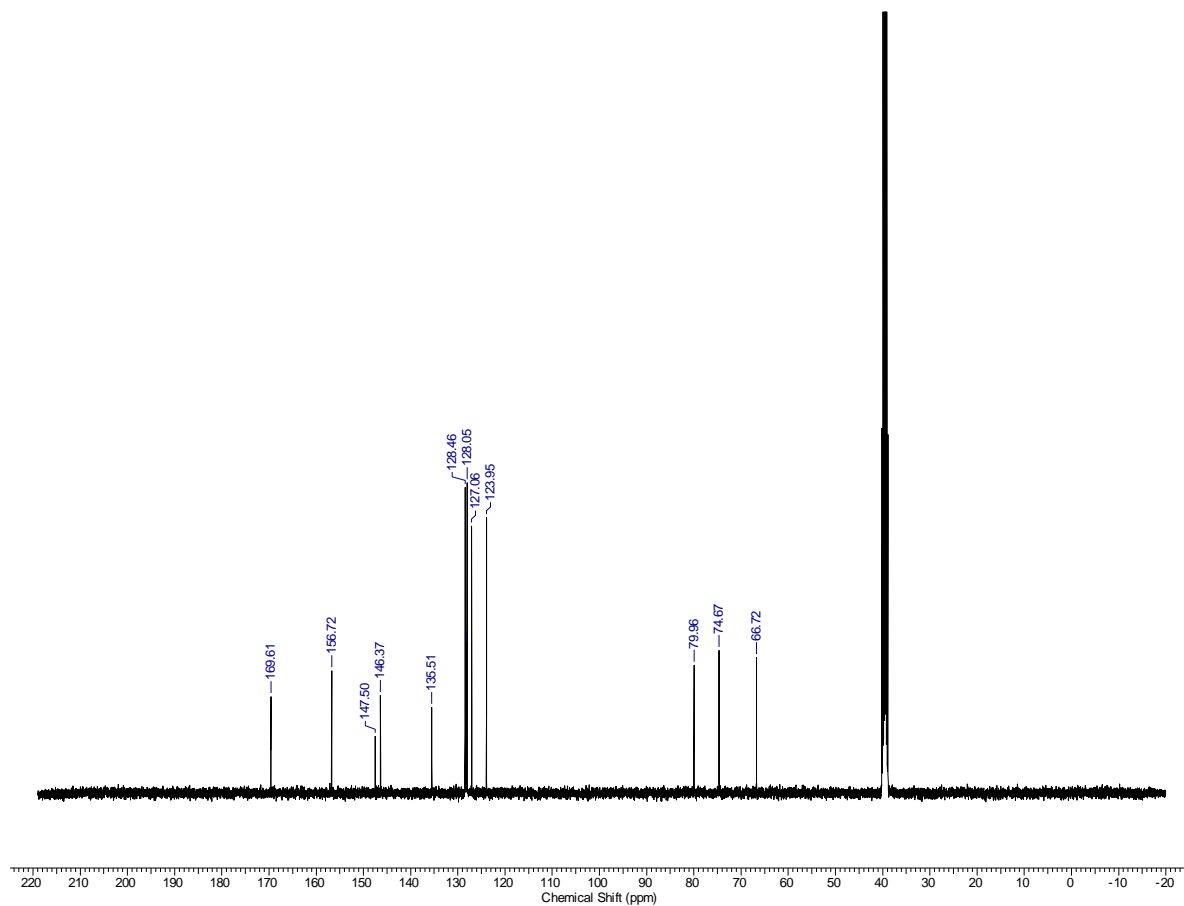

**(4-Methoxyphenyl)methyl (4*S*,5*R*)-5-(4-nitrophenyl)-4,5-dihydro-1,3-oxazole-4-carboxylate (6d)**

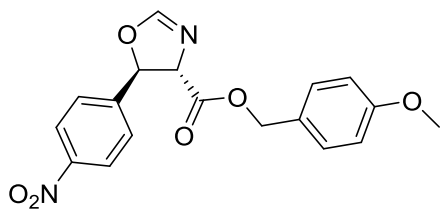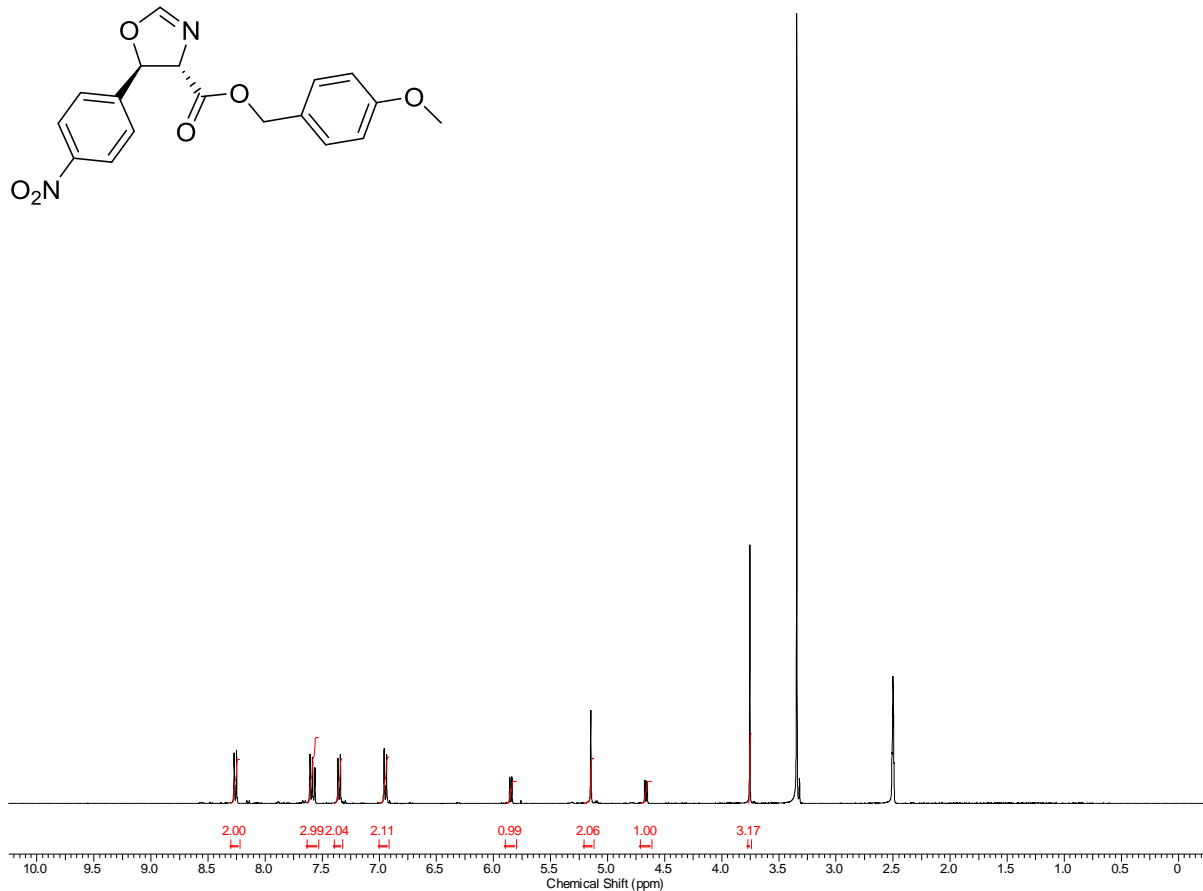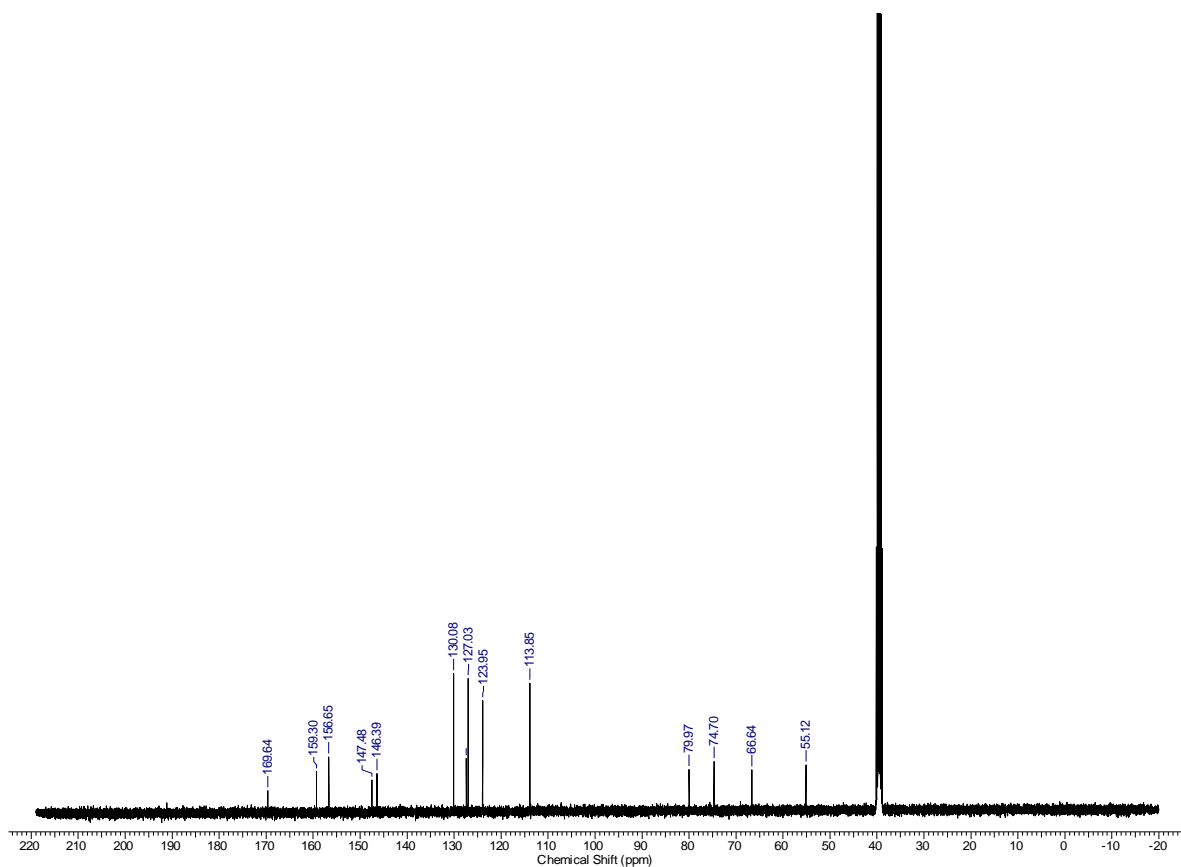



**[3,5-Bis(trifluoromethyl)phenyl]methyl (4*S*,5*R*)-5-(4-nitrophenyl)-4,5-dihydro-1,3-oxazole-4-carboxylate (6e)**

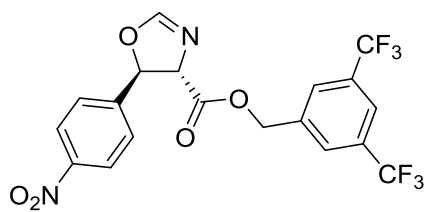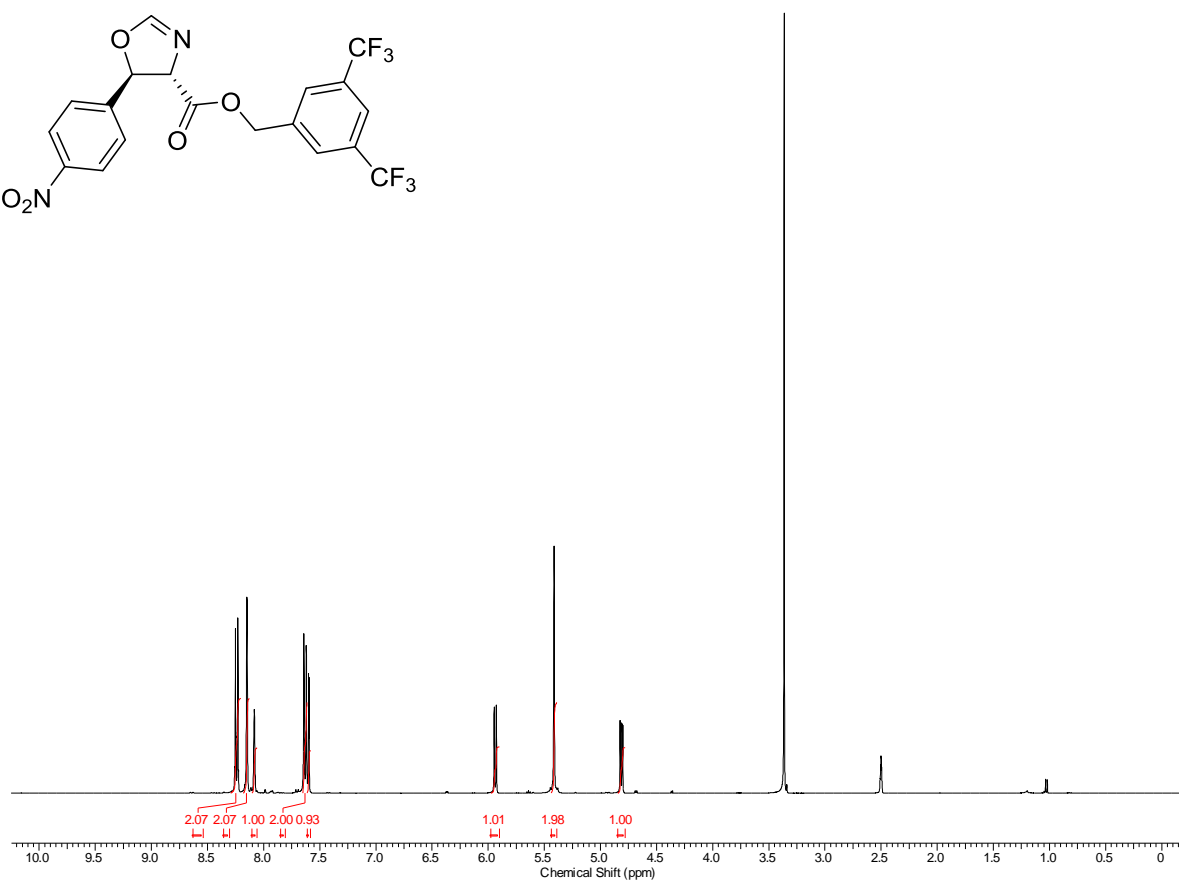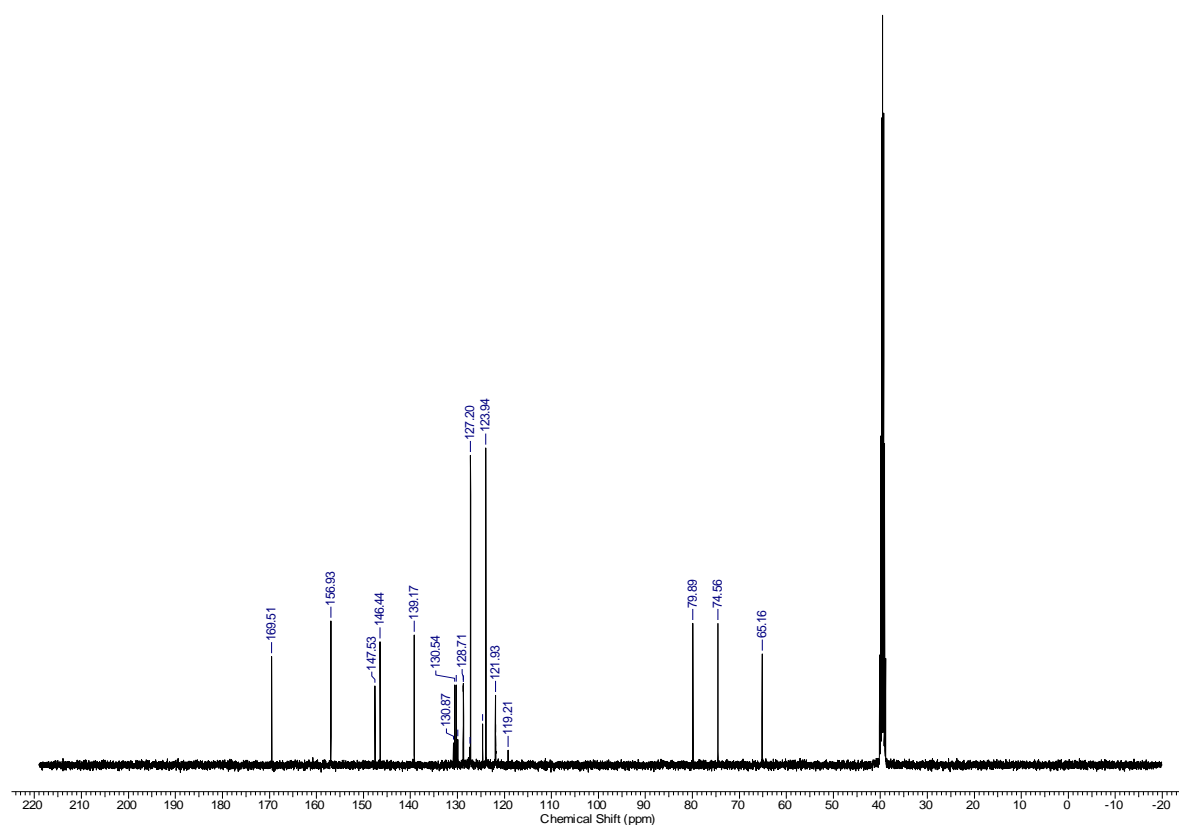

Diphenylmethyl (4*S*,5*R*)-5-(4-nitrophenyl)-4,5-dihydro-1,3-oxazole-4-carboxylate (6f)

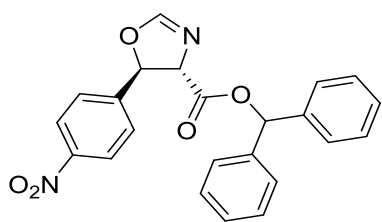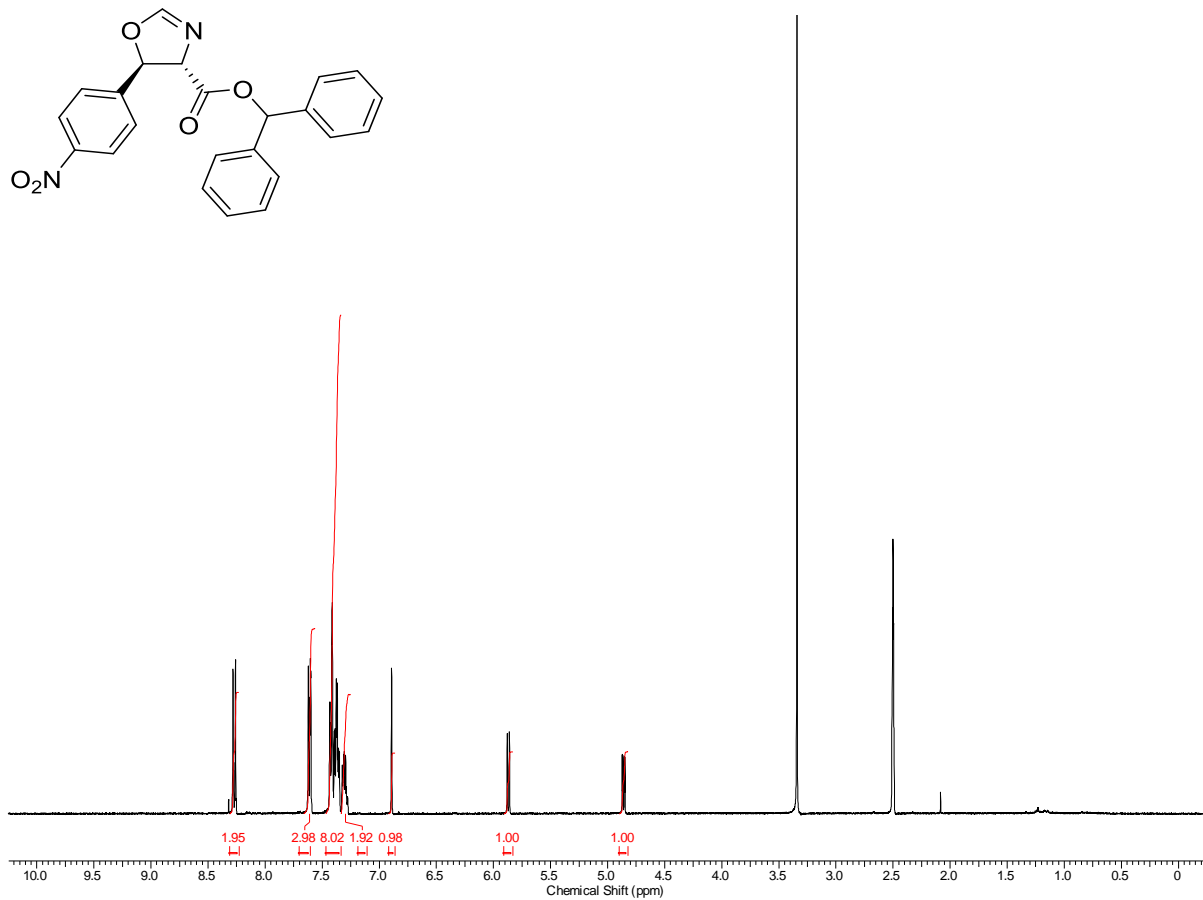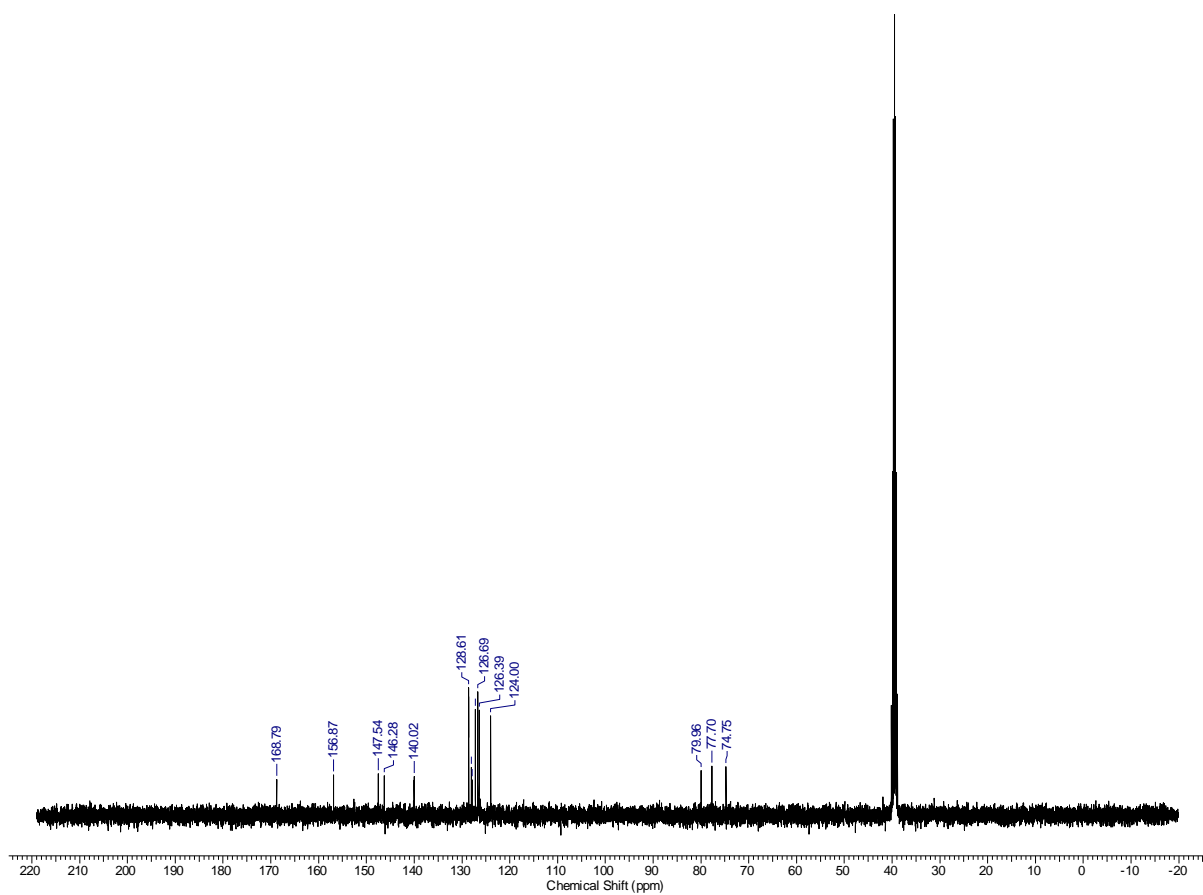

# Diphenylmethyl (2*S*,3*R*)-2-amino-3-hydroxy-3-(4-nitrophenyl)propanoate (5)

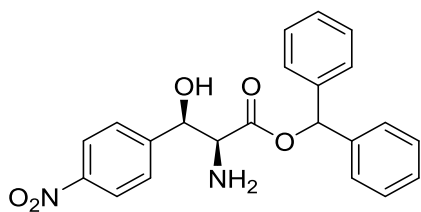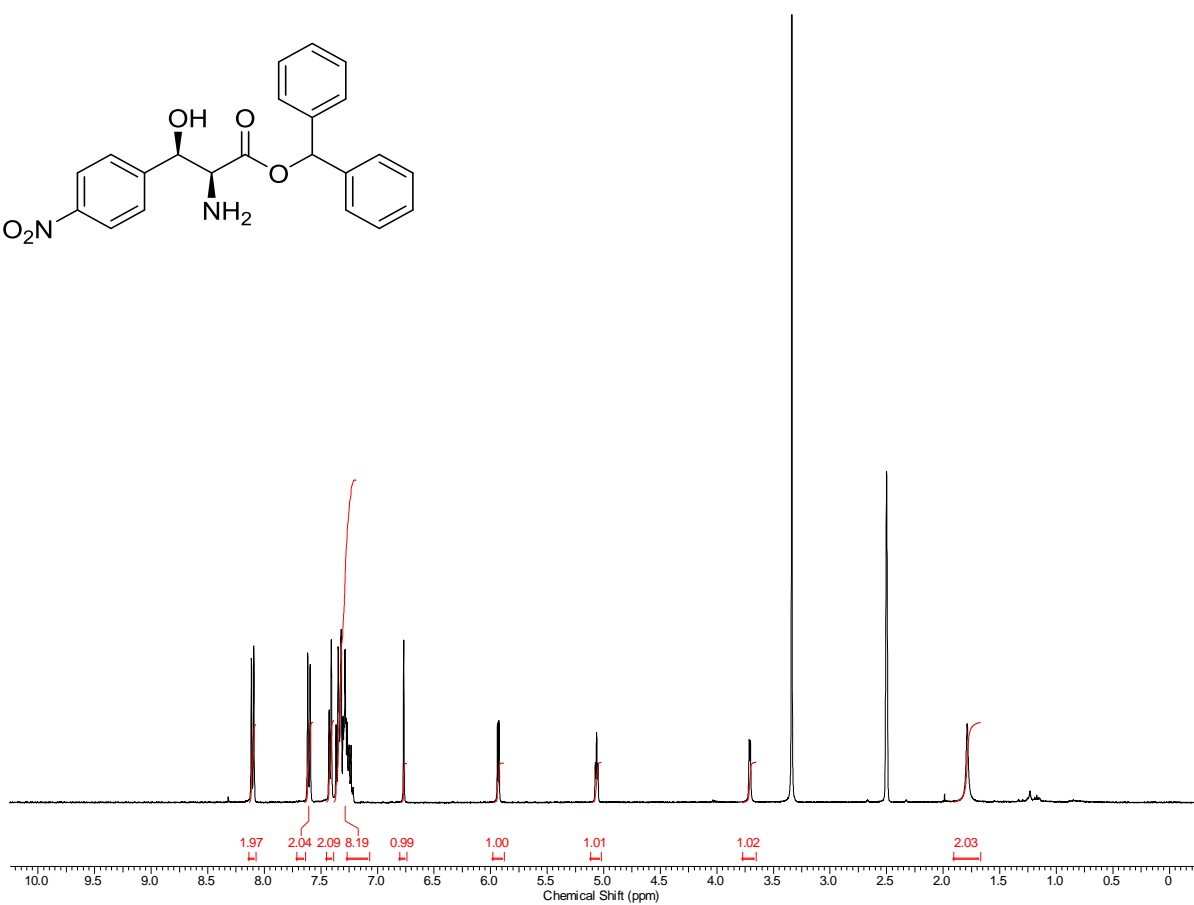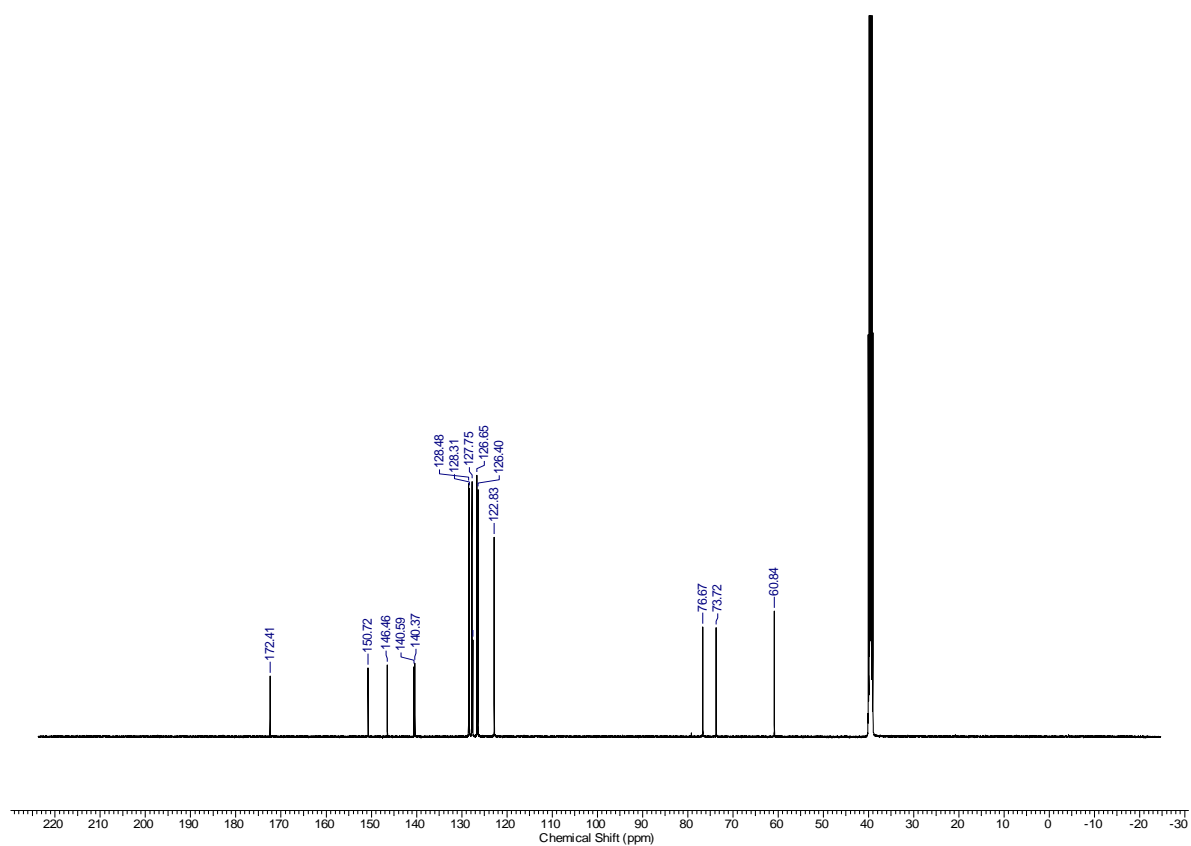

**Diphenylmethyl (2*S*,3*R*)-2-(2,2-dichloroacetamido)-3-hydroxy-3-(4-nitrophenyl)propanoate**  
**(9)**

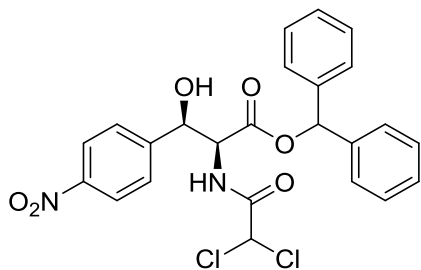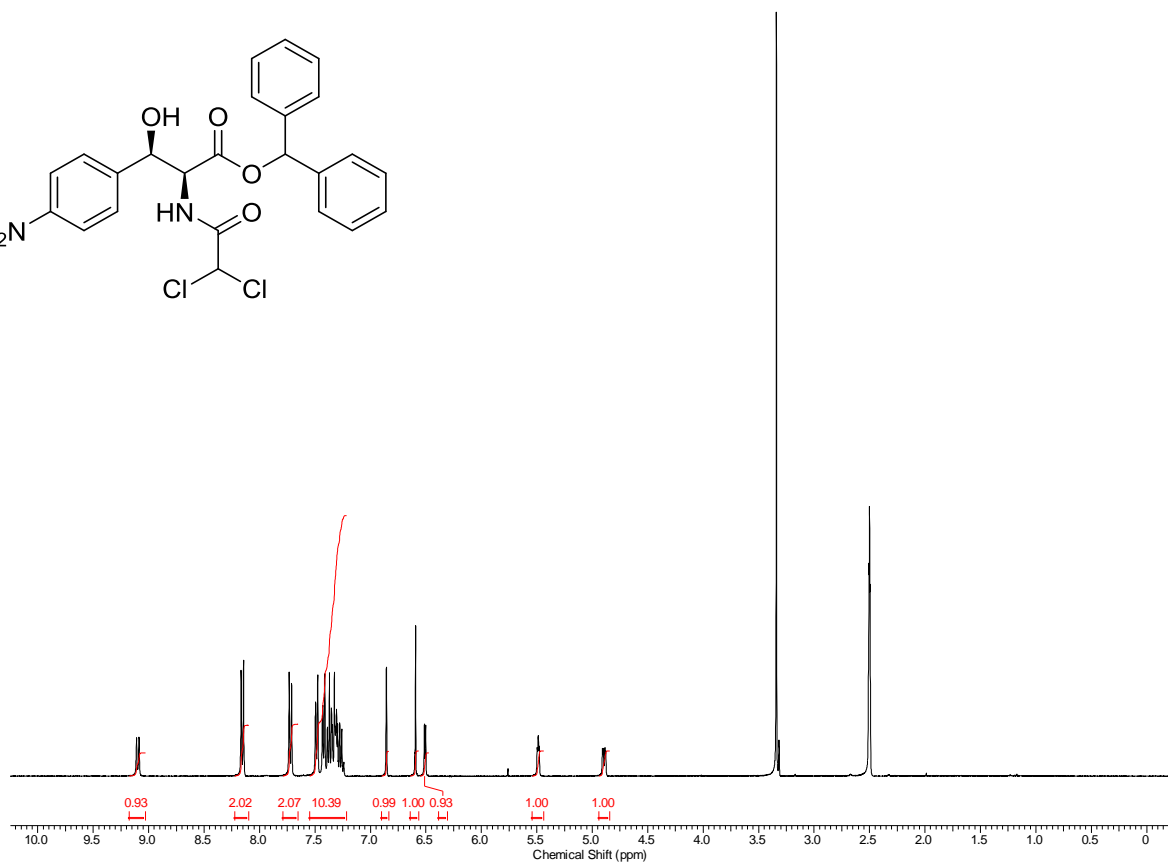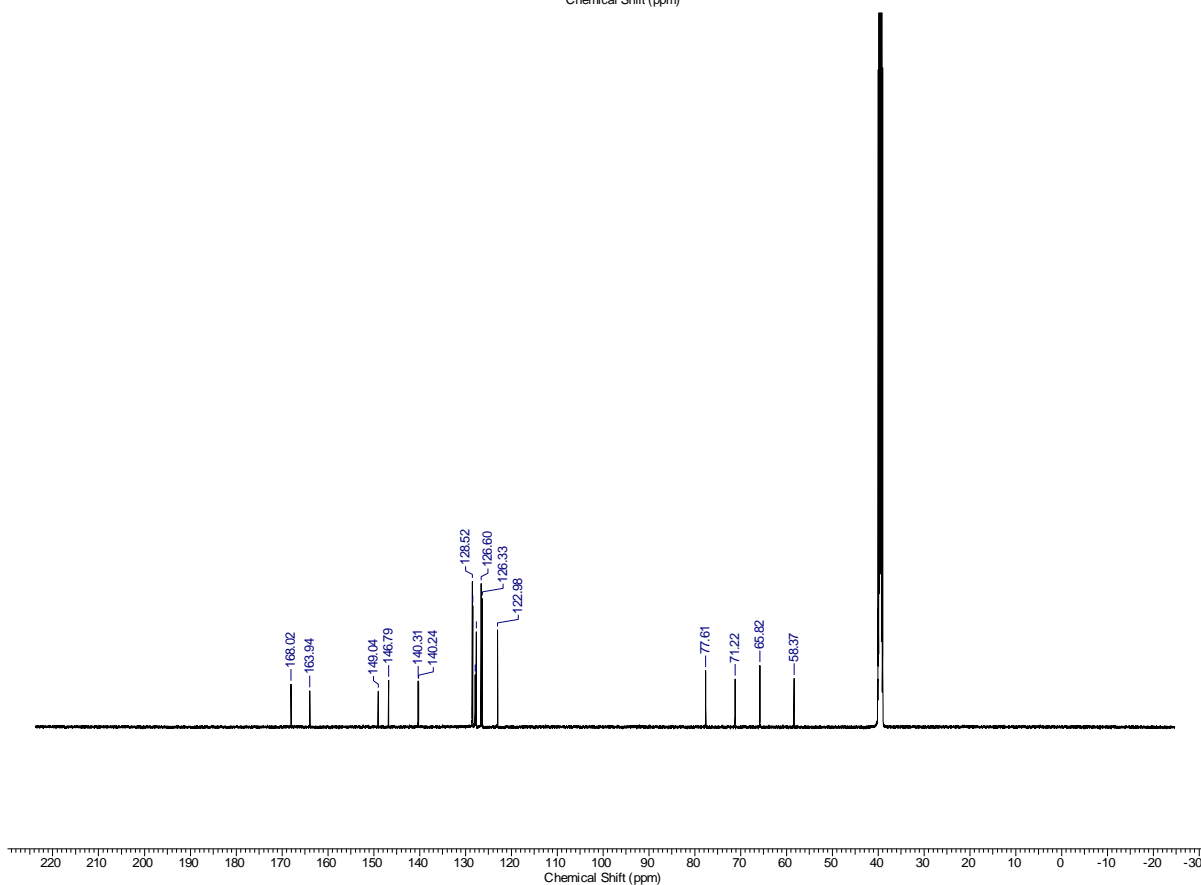

**(-)-Chloramphenicol (-)-(1)**

**2,2-dichloro-N-[(1R,2R)-1,3-dihydroxy-1-(4-nitrophenyl)propan-2-yl]acetamide**

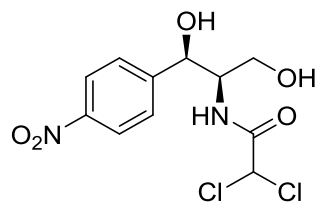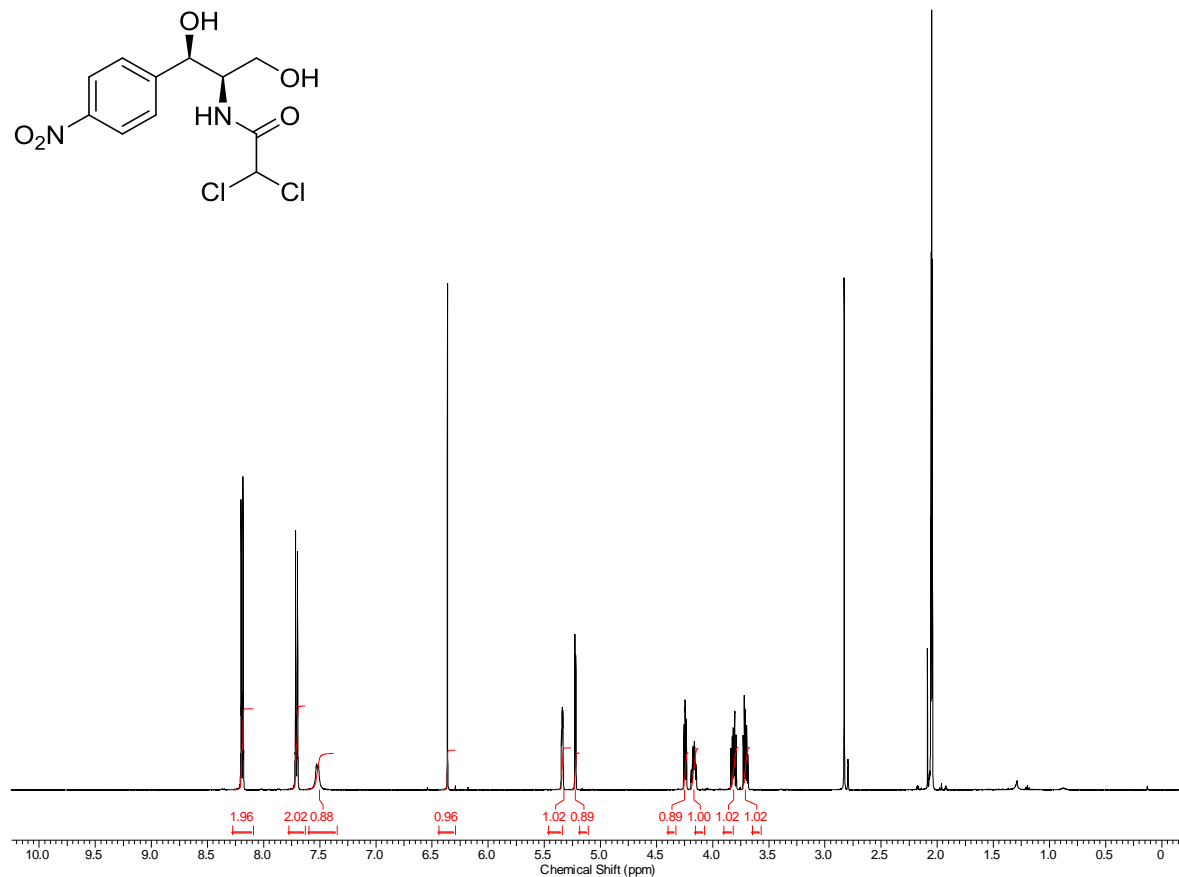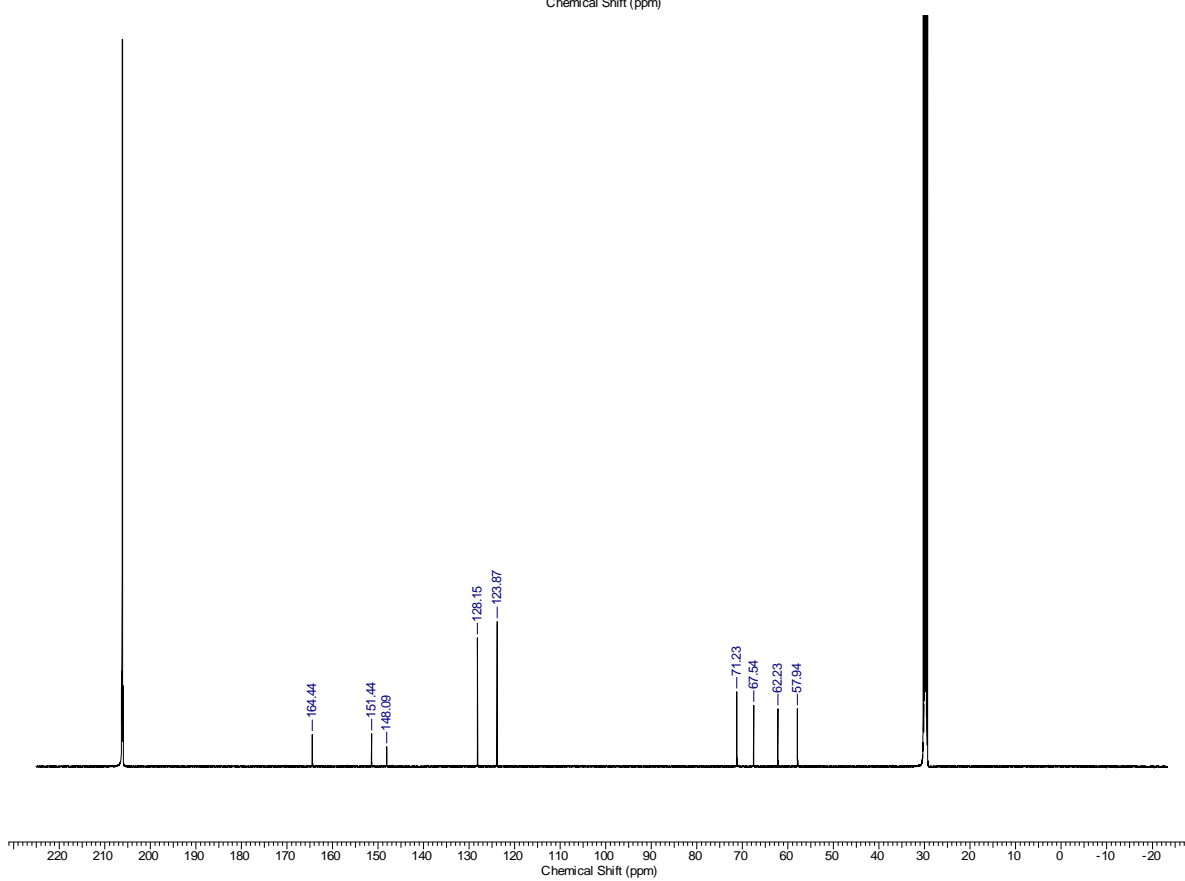

## 4. HPLC traces

### *tert*-Butyl (4*S*,5*R*)-5-(4-nitrophenyl)-4,5-dihydro-1,3-oxazole-4-carboxylate (6a)

Chiralpak OD column, hexane/*i*-PrOH 90:10, 1.0 mL/min

Racemic

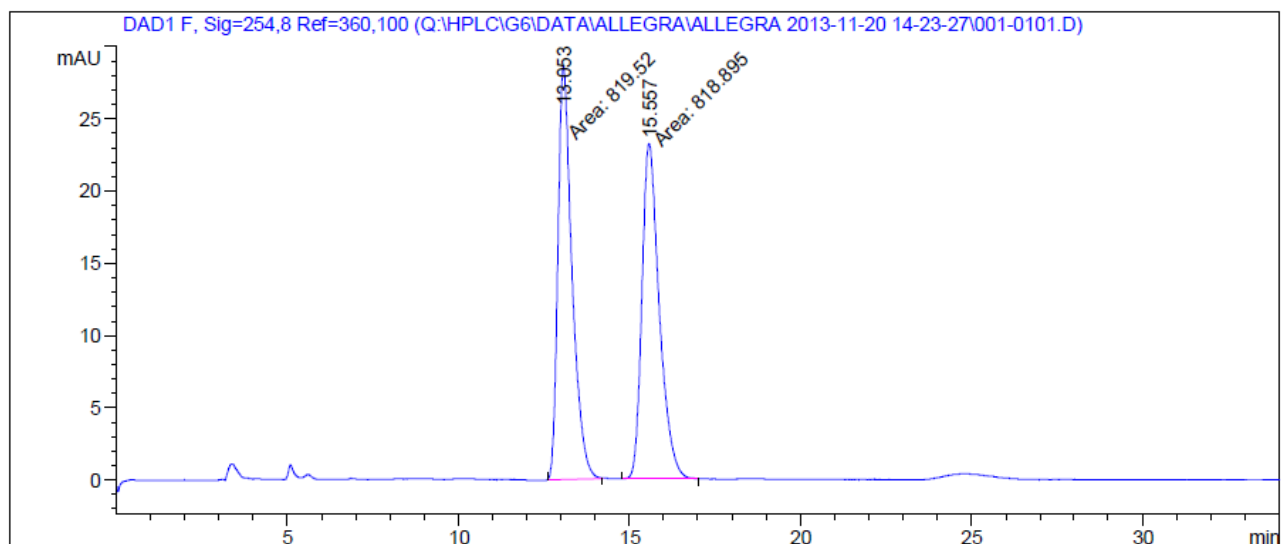

| Peak # | RetTime [min] | Type | Width [min] | Area [mAU*s] | Height [mAU] | Area %  |
|--------|---------------|------|-------------|--------------|--------------|---------|
| 1      | 13.053        | MM   | 0.4782      | 819.51959    | 28.55988     | 50.0190 |
| 2      | 15.557        | MM   | 0.5880      | 818.89539    | 23.21058     | 49.9810 |

Enantiomerically enriched (78% ee)

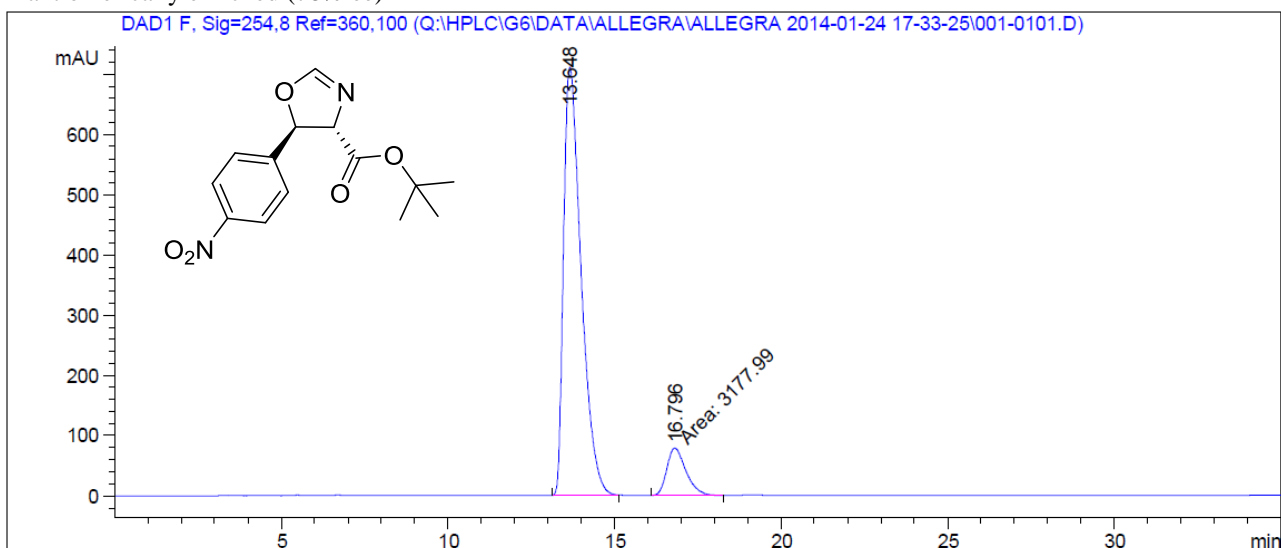

| Peak # | RetTime [min] | Type | Width [min] | Area [mAU*s] | Height [mAU] | Area %  |
|--------|---------------|------|-------------|--------------|--------------|---------|
| 1      | 13.648        | BB   | 0.5609      | 2.60332e4    | 711.43793    | 89.1206 |
| 2      | 16.796        | MM   | 0.6717      | 3177.99292   | 78.84939     | 10.8794 |

## Methyl (4*S*,5*R*)-5-(4-nitrophenyl)-4,5-dihydro-1,3-oxazole-4-carboxylate (**6b**)

Chiralpak AD column, hexane/*i*-PrOH 85:15, 1.0 mL/min

Racemic

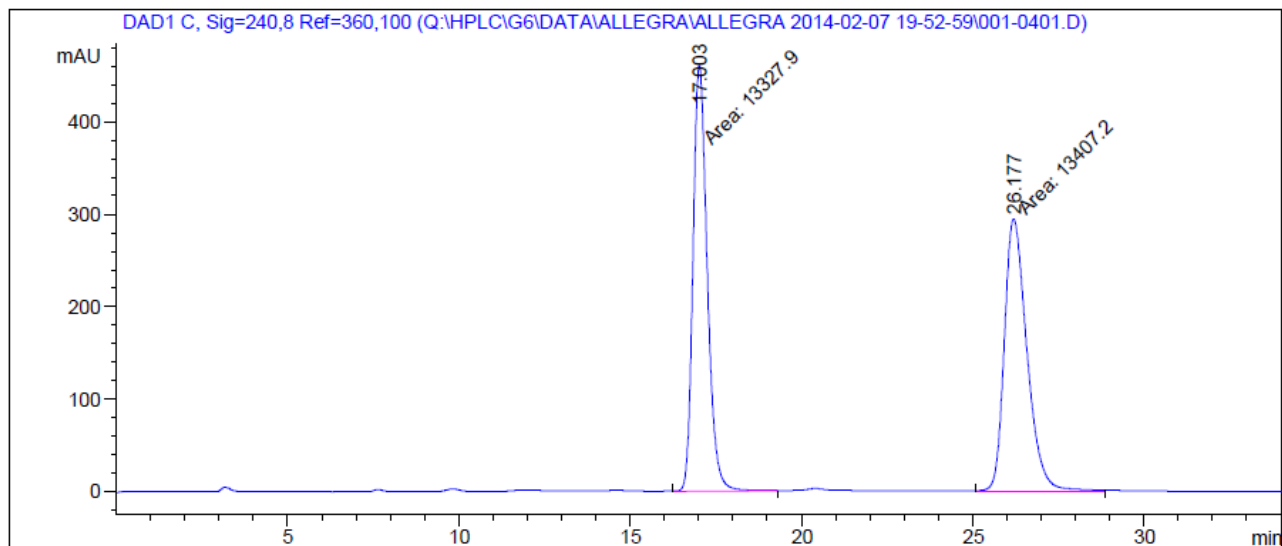

| Peak # | RetTime [min] | Type | Width [min] | Area [mAU*s] | Height [mAU] | Area %  |
|--------|---------------|------|-------------|--------------|--------------|---------|
| 1      | 17.003        | MM   | 0.4821      | 1.33279e4    | 460.78815    | 49.8517 |
| 2      | 26.177        | MM   | 0.7596      | 1.34072e4    | 294.16309    | 50.1483 |

Enantiomerically enriched (82% ee)

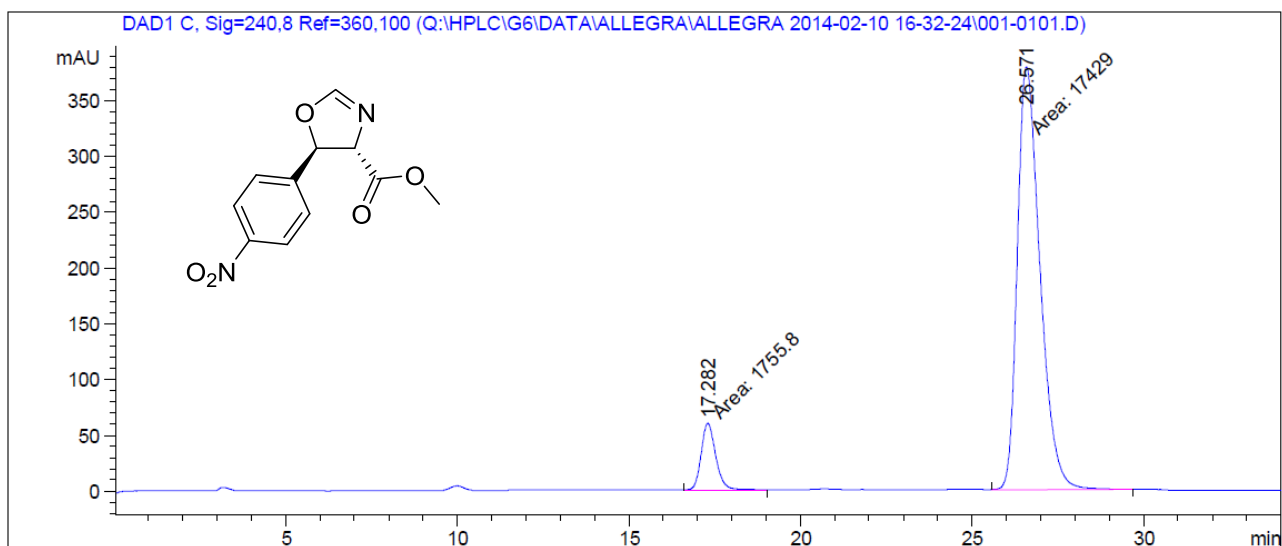

| Peak # | RetTime [min] | Type | Width [min] | Area [mAU*s] | Height [mAU] | Area %  |
|--------|---------------|------|-------------|--------------|--------------|---------|
| 1      | 17.282        | MM   | 0.4898      | 1755.80188   | 59.74990     | 9.1520  |
| 2      | 26.571        | MM   | 0.7665      | 1.74290e4    | 378.96262    | 90.8480 |

## Benzyl (4*S*,5*R*)-5-(4-nitrophenyl)-4,5-dihydro-1,3-oxazole-4-carboxylate (**6c**)

Chiralpak AD column, hexane/*i*-PrOH 85:15, 1.0 mL/min

Racemic

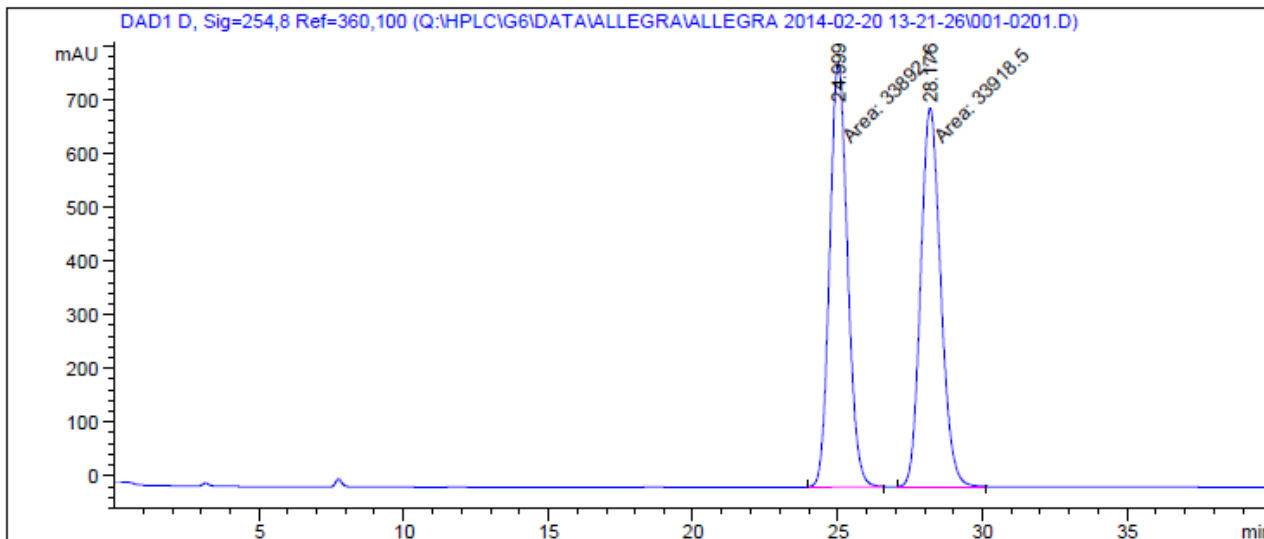

| Peak # | RetTime [min] | Type | Width [min] | Area [mAU*s] | Height [mAU] | Area %  |
|--------|---------------|------|-------------|--------------|--------------|---------|
| 1      | 24.999        | MM   | 0.7164      | 3.38921e4    | 788.47339    | 49.9805 |
| 2      | 28.176        | MM   | 0.8026      | 3.39185e4    | 704.35901    | 50.0195 |

Enantiomerically enriched (87% ee)

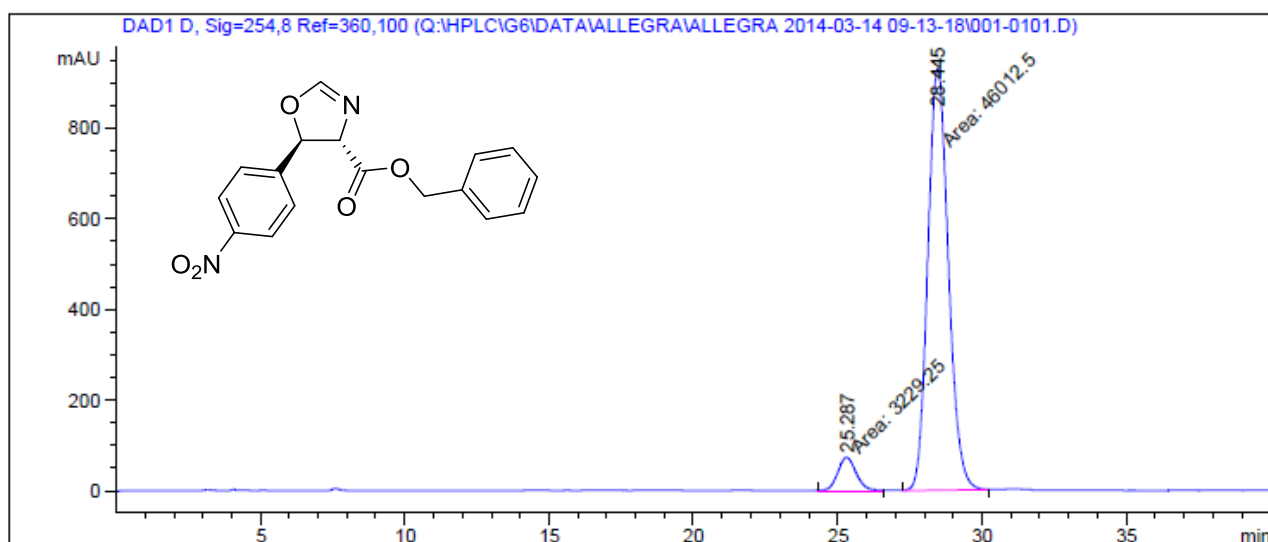

| Peak # | RetTime [min] | Type | Width [min] | Area [mAU*s] | Height [mAU] | Area %  |
|--------|---------------|------|-------------|--------------|--------------|---------|
| 1      | 25.287        | MM   | 0.7370      | 3229.25269   | 73.02599     | 6.5580  |
| 2      | 28.445        | MM   | 0.8240      | 4.60125e4    | 930.69653    | 93.4420 |



**(4-Methoxyphenyl)methyl (4*S*,5*R*)-5-(4-nitrophenyl)-4,5-dihydro-1,3-oxazole-4-carboxylate (6d)**

Chiralpak AD column, hexane/*i*-PrOH 80:20, 1.0 mL/min

Racemic

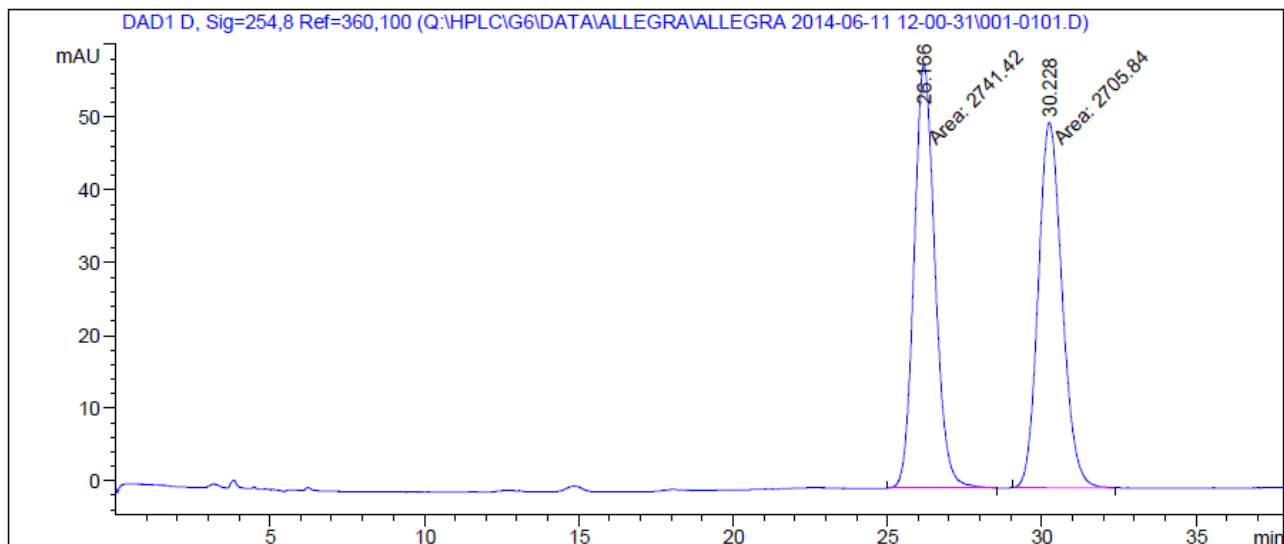

| Peak # | RetTime [min] | Type | Width [min] | Area [mAU*s] | Height [mAU] | Area %  |
|--------|---------------|------|-------------|--------------|--------------|---------|
| 1      | 26.166        | MM   | 0.7856      | 2741.42114   | 58.15964     | 50.3266 |
| 2      | 30.228        | MM   | 0.8968      | 2705.84351   | 50.28980     | 49.6734 |

Enantiomerically enriched (86% ee)

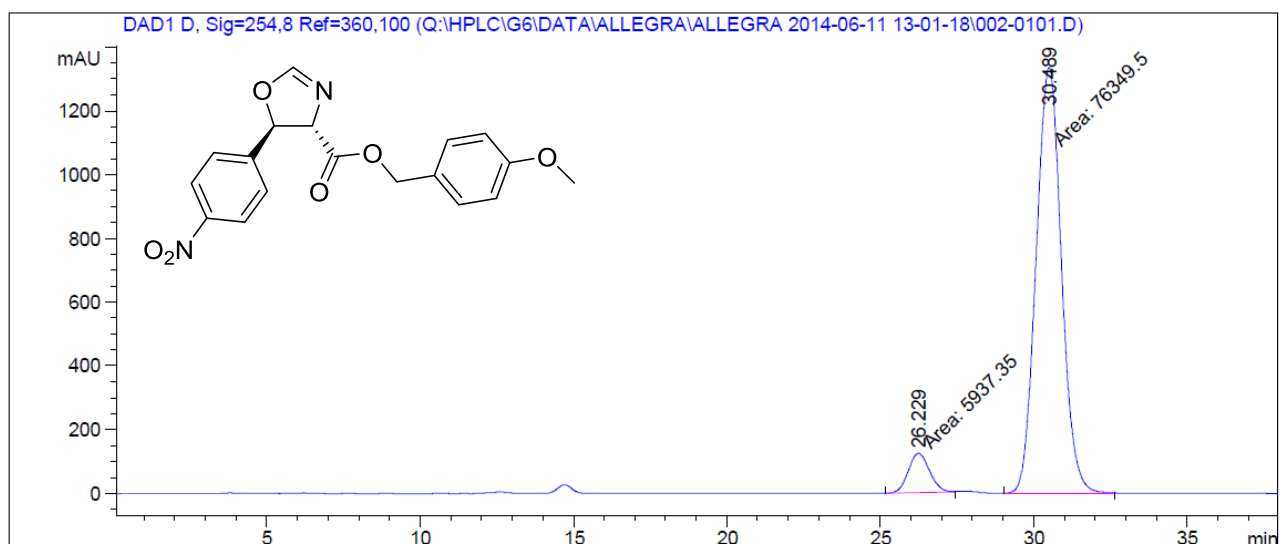

| Peak # | RetTime [min] | Type | Width [min] | Area [mAU*s] | Height [mAU] | Area %  |
|--------|---------------|------|-------------|--------------|--------------|---------|
| 1      | 26.229        | MM   | 0.8026      | 5937.35059   | 123.29778    | 7.2154  |
| 2      | 30.489        | MM   | 0.9533      | 7.63495e4    | 1334.82520   | 92.7846 |

# [3,5-Bis(trifluoromethyl)phenyl]methyl (4*S*,5*R*)-5-(4-nitrophenyl)-4,5-dihydro-1,3-oxazole-4-carboxylate (6e)

Chiralpak AD column, hexane/*i*-PrOH 80:20, 1.0 mL/min

Racemic

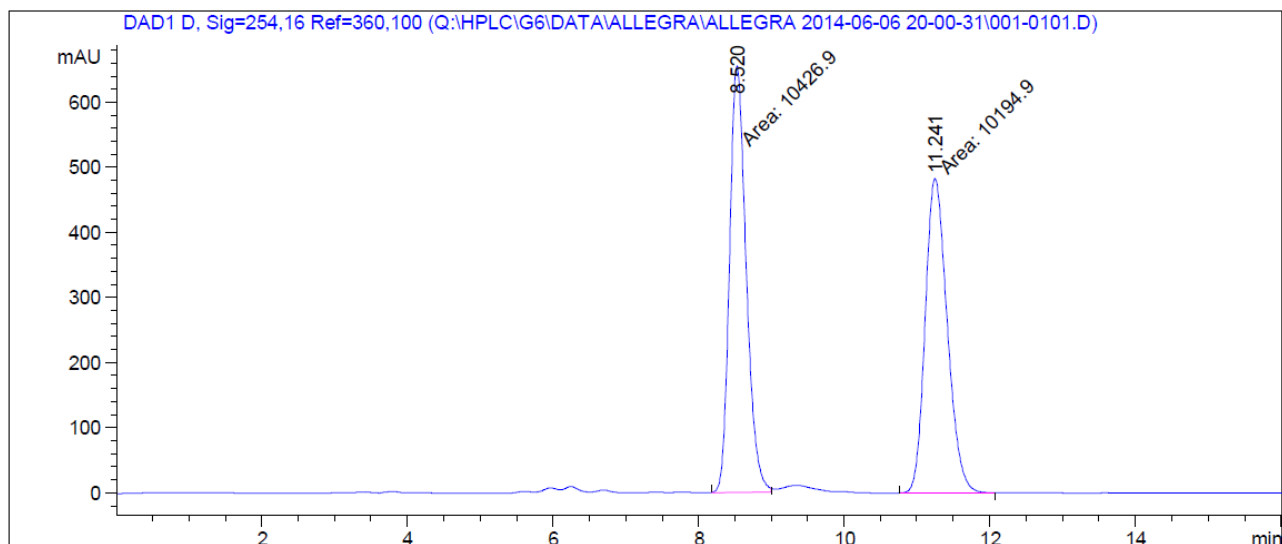

| Peak # | RetTime [min] | Type | Width [min] | Area [mAU*s] | Height [mAU] | Area %  |
|--------|---------------|------|-------------|--------------|--------------|---------|
| 1      | 8.520         | MM   | 0.2651      | 1.04269e4    | 655.57812    | 50.5626 |
| 2      | 11.241        | MM   | 0.3513      | 1.01949e4    | 483.64023    | 49.4374 |

Enantiomerically enriched (84% ee)

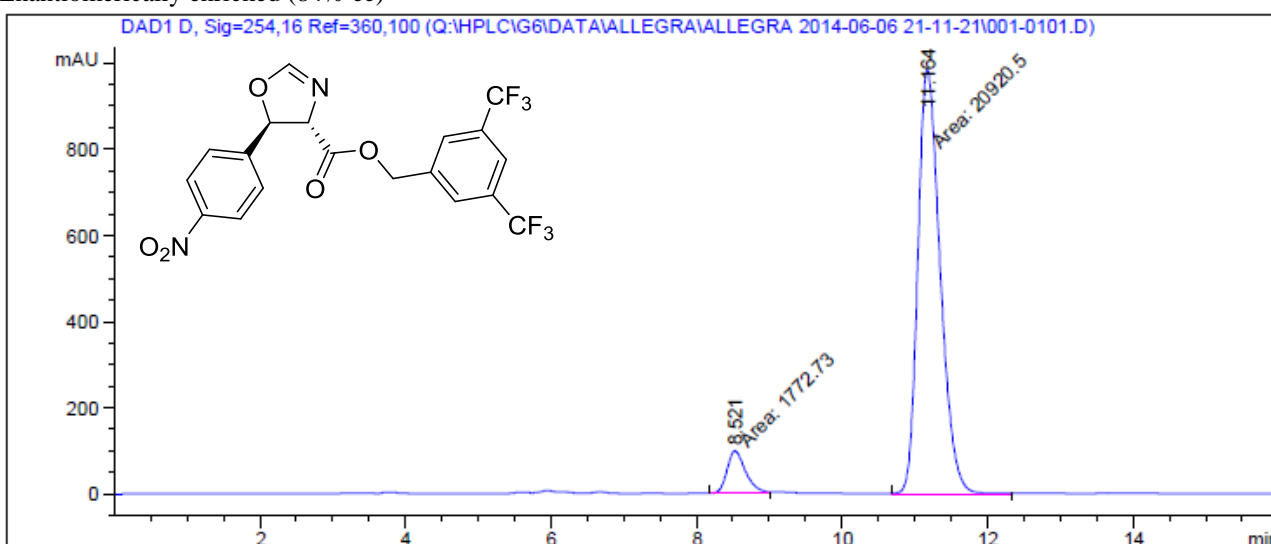

| Peak # | RetTime [min] | Type | Width [min] | Area [mAU*s] | Height [mAU] | Area %  |
|--------|---------------|------|-------------|--------------|--------------|---------|
| 1      | 8.521         | MF   | 0.2991      | 1772.73328   | 98.78858     | 7.8117  |
| 2      | 11.164        | MM   | 0.3540      | 2.09205e4    | 984.97302    | 92.1883 |

# Diphenylmethyl (4*S*,5*R*)-5-(4-nitrophenyl)-4,5-dihydro-1,3-oxazole-4-carboxylate (4*S*,5*R*)-(6f)

Chiralpak OD column, hexane/*i*-PrOH 85:15, 1.0 mL/min

Racemic

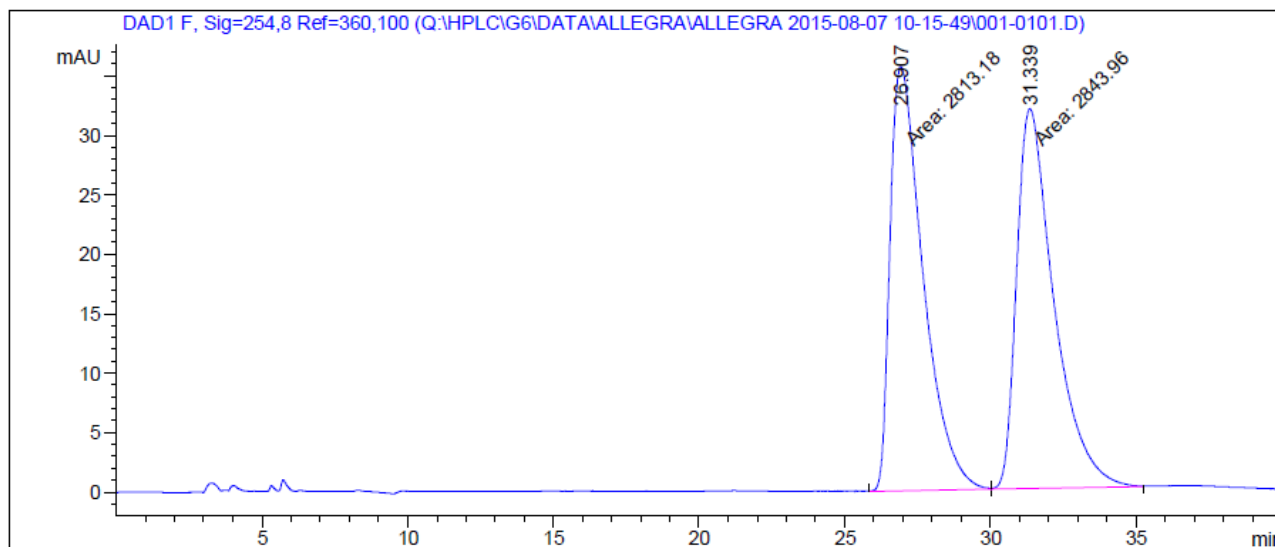

| Peak # | RetTime [min] | Type | Width [min] | Area [mAU*s] | Height [mAU] | Area %  |
|--------|---------------|------|-------------|--------------|--------------|---------|
| 1      | 26.907        | MM   | 1.3131      | 2813.17822   | 35.70642     | 49.7280 |
| 2      | 31.339        | MM   | 1.4836      | 2843.95801   | 31.94887     | 50.2720 |

Enantiomerically enriched (89% ee)

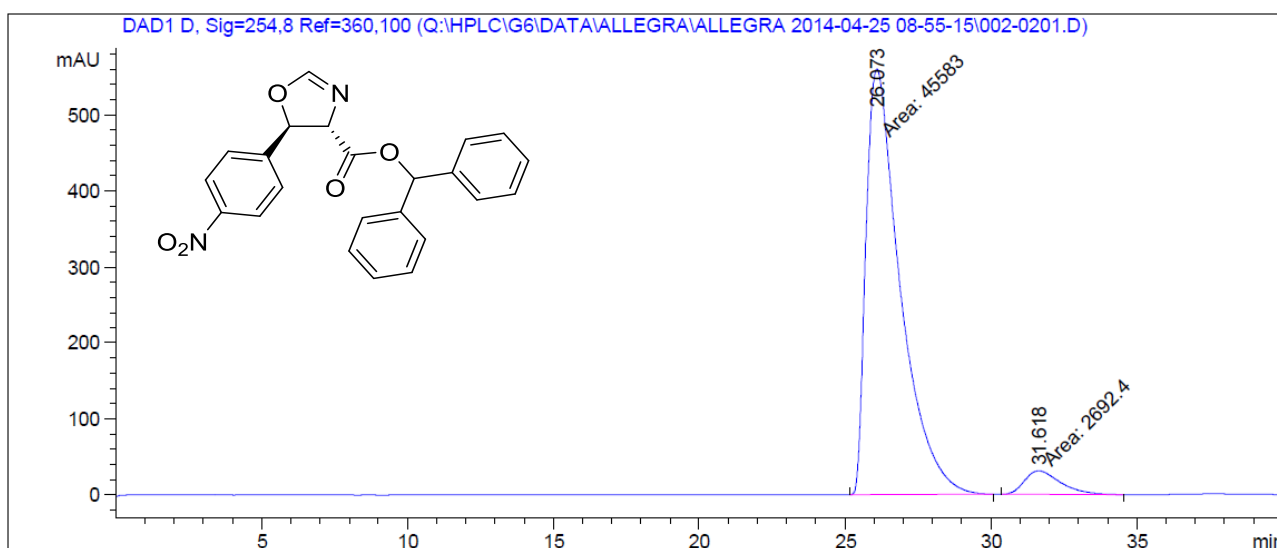

| Peak # | RetTime [min] | Type | Width [min] | Area [mAU*s] | Height [mAU] | Area %  |
|--------|---------------|------|-------------|--------------|--------------|---------|
| 1      | 26.073        | MM   | 1.3563      | 4.55830e4    | 560.15430    | 94.4228 |
| 2      | 31.618        | MM   | 1.4420      | 2692.39966   | 31.11789     | 5.5772  |

# Diphenylmethyl (4*R*,5*S*)-5-(4-nitrophenyl)-4,5-dihydro-1,3-oxazole-4-carboxylate (4*R*,5*S*)-(6f)

Chiralpak OD column, hexane/*i*-PrOH 85:15, 1.0 mL/min

Racemic



| Peak # | RetTime [min] | Type | Width [min] | Area [mAU*s] | Height [mAU] | Area %  |
|--------|---------------|------|-------------|--------------|--------------|---------|
| 1      | 26.907        | MM   | 1.3131      | 2813.17822   | 35.70642     | 49.7280 |
| 2      | 31.339        | MM   | 1.4836      | 2843.95801   | 31.94887     | 50.2720 |

Enantiomerically enriched (93% ee)

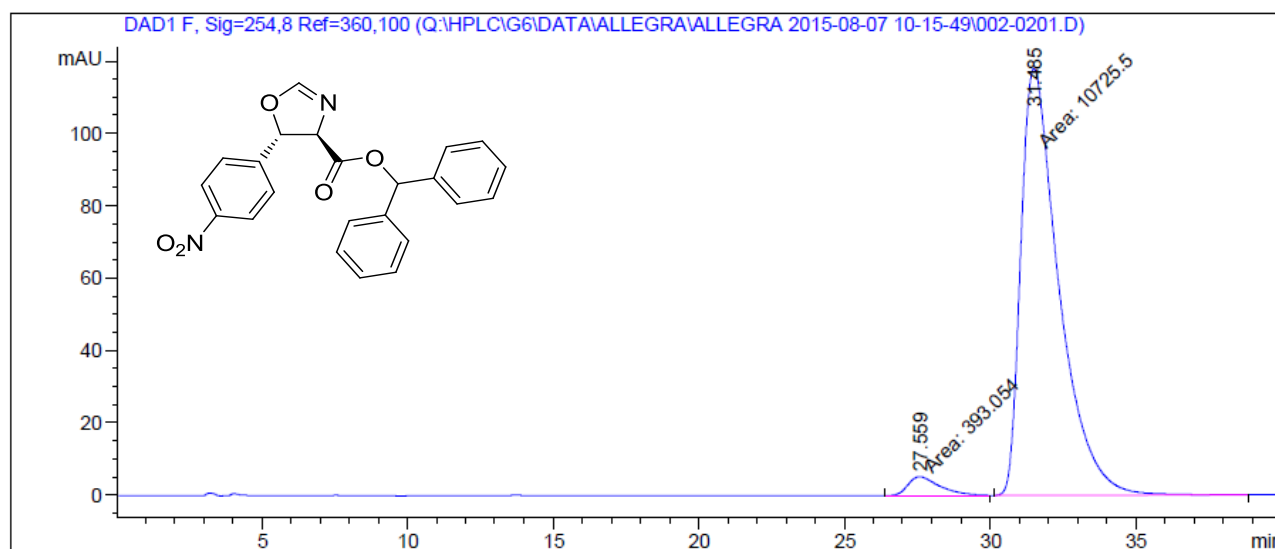

| Peak # | RetTime [min] | Type | Width [min] | Area [mAU*s] | Height [mAU] | Area %  |
|--------|---------------|------|-------------|--------------|--------------|---------|
| 1      | 27.559        | MM   | 1.2665      | 393.05353    | 5.17231      | 3.5351  |
| 2      | 31.485        | MM   | 1.5141      | 1.07255e4    | 118.06521    | 96.4649 |

# Diphenylmethyl (2*S*,3*R*)-2-amino-3-hydroxy-3-(4-nitrophenyl)propanoate (2*S*,3*R*)-(5)

Chiralpak AD column, hexane/*i*-PrOH 70:30, 0.8 mL/min

Racemic

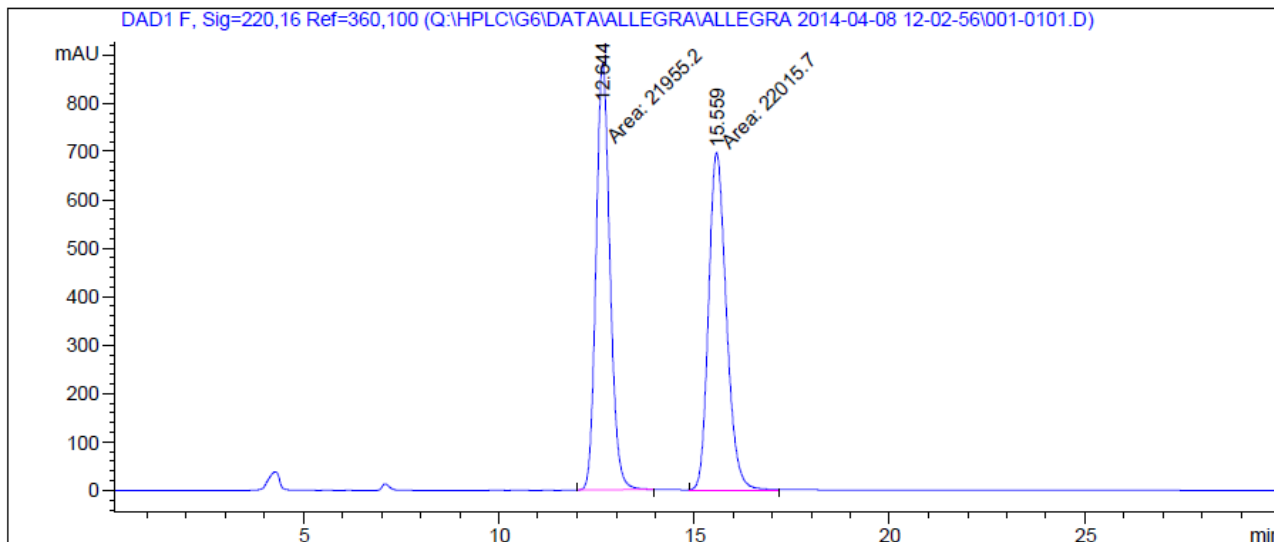

| Peak # | RetTime [min] | Type | Width [min] | Area [mAU*s] | Height [mAU] | Area %  |
|--------|---------------|------|-------------|--------------|--------------|---------|
| 1      | 12.644        | MM   | 0.4150      | 2.19552e4    | 881.81708    | 49.9312 |
| 2      | 15.559        | MM   | 0.5267      | 2.20157e4    | 696.66559    | 50.0688 |

Enantiomerically enriched (98% ee)

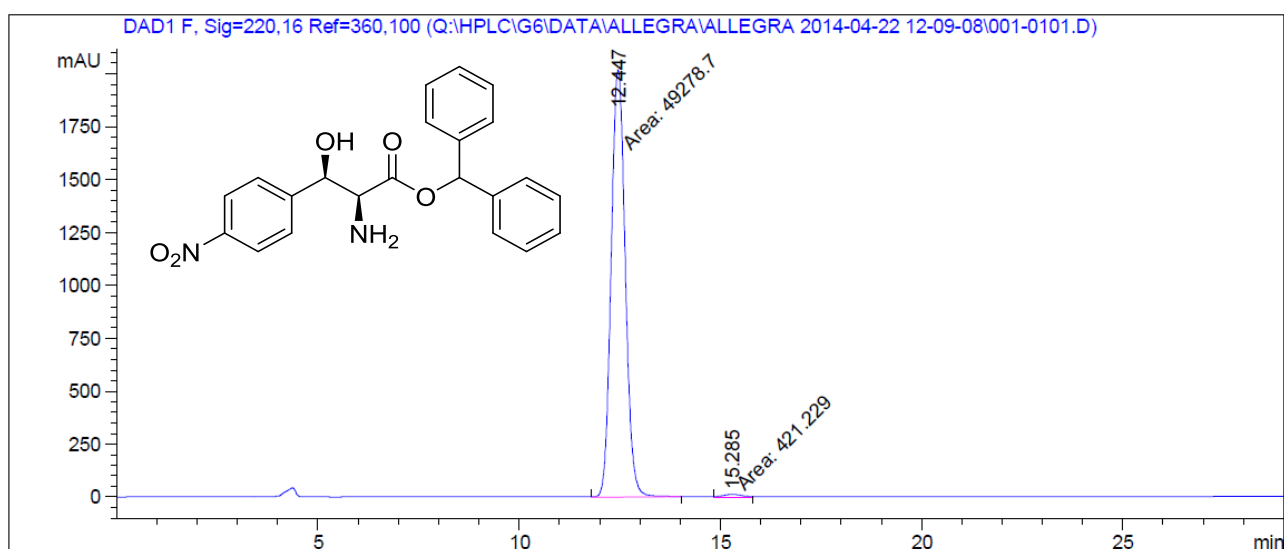

| Peak # | RetTime [min] | Type | Width [min] | Area [mAU*s] | Height [mAU] | Area %  |
|--------|---------------|------|-------------|--------------|--------------|---------|
| 1      | 12.447        | MM   | 0.4066      | 4.92787e4    | 2020.15015   | 99.1525 |
| 2      | 15.285        | MM   | 0.5268      | 421.22940    | 13.32771     | 0.8475  |

# Diphenylmethyl (2R,3S)-2-amino-3-hydroxy-3-(4-nitrophenyl)propanoate (2R,3S)-(5)

Chiralpak AD column, hexane/*i*-PrOH 70:30, 0.8 mL/min

Racemic



| Peak # | RetTime [min] | Type | Width [min] | Area [mAU*s] | Height [mAU] | Area %  |
|--------|---------------|------|-------------|--------------|--------------|---------|
| 1      | 12.644        | MM   | 0.4150      | 2.19552e4    | 881.81708    | 49.9312 |
| 2      | 15.559        | MM   | 0.5267      | 2.20157e4    | 696.66559    | 50.0688 |

Enantiomerically enriched (94% ee)

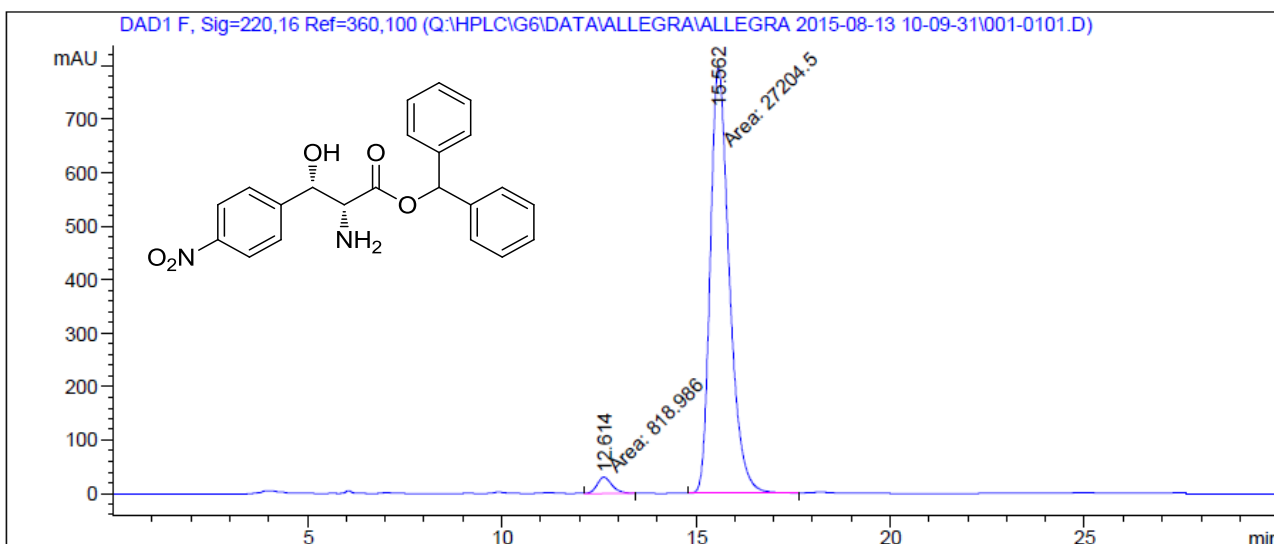

| Peak # | RetTime [min] | Type | Width [min] | Area [mAU*s] | Height [mAU] | Area %  |
|--------|---------------|------|-------------|--------------|--------------|---------|
| 1      | 12.614        | MM   | 0.4463      | 818.98645    | 30.58410     | 2.9225  |
| 2      | 15.562        | MM   | 0.5696      | 2.72045e4    | 795.97314    | 97.0775 |

**Diphenylmethyl (2*S*,3*R*)-2-(2,2-dichloroacetamido)-3-hydroxy-3-(4-nitrophenyl)propanoate (2*S*,3*R*)-(9)**

Chiralpak AD column, hexane/*i*-PrOH 70:30, 0.8 mL/min

Racemic

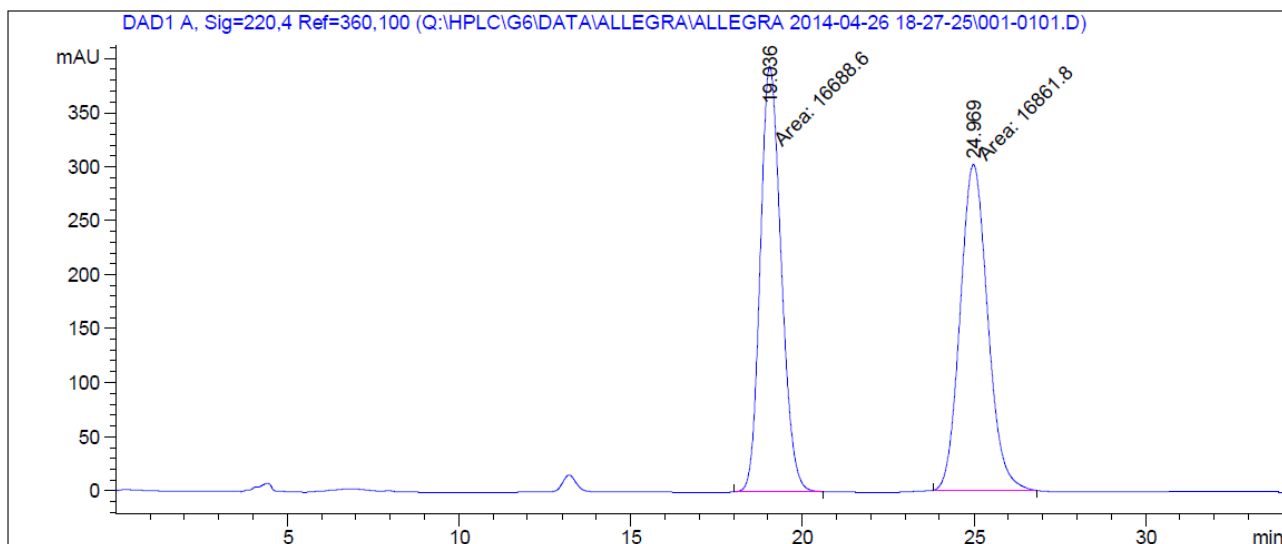

| Peak # | RetTime [min] | Type | Width [min] | Area [mAU*s] | Height [mAU] | Area %  |
|--------|---------------|------|-------------|--------------|--------------|---------|
| 1      | 19.036        | MM   | 0.7055      | 1.66886e4    | 394.22455    | 49.7419 |
| 2      | 24.969        | MM   | 0.9305      | 1.68618e4    | 302.02881    | 50.2581 |

Enantiomerically enriched (98% ee)

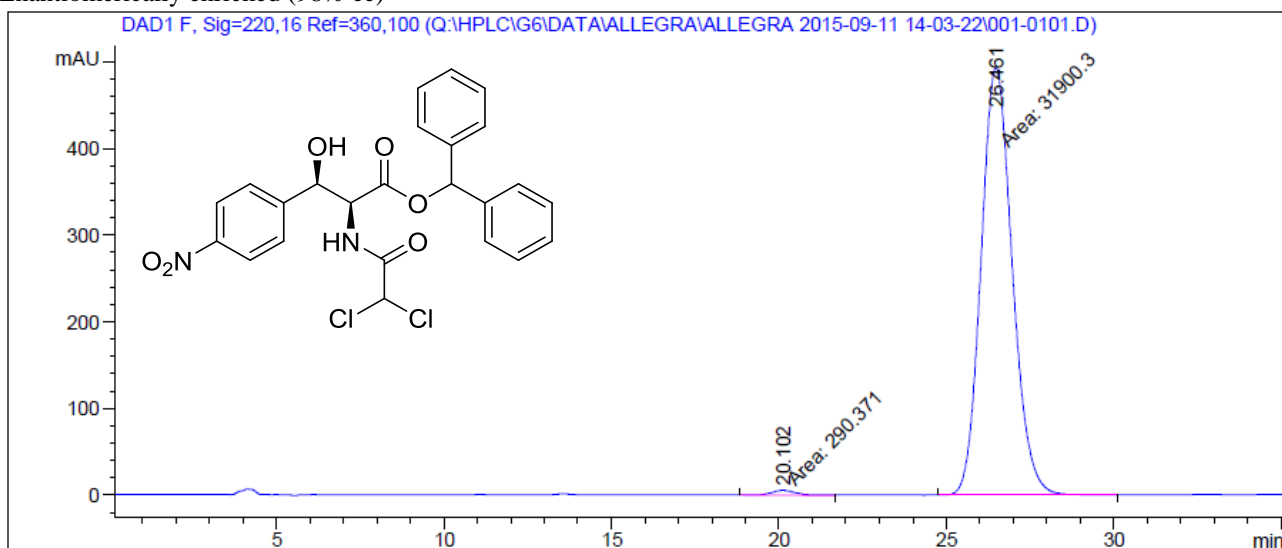

| Peak # | RetTime [min] | Type | Width [min] | Area [mAU*s] | Height [mAU] | Area %  |
|--------|---------------|------|-------------|--------------|--------------|---------|
| 1      | 20.102        | MM   | 0.8492      | 290.37076    | 5.69907      | 0.9020  |
| 2      | 26.461        | MM   | 1.0785      | 3.19003e4    | 492.96762    | 99.0980 |

# Diphenylmethyl (2*R*,3*S*)-2-(2,2-dichloroacetamido)-3-hydroxy-3-(4-nitrophenyl)propanoate (2*R*,3*S*)-(9)

Chiralpak AD column, hexane/*i*-PrOH 70:30, 0.8 mL/min

Racemic

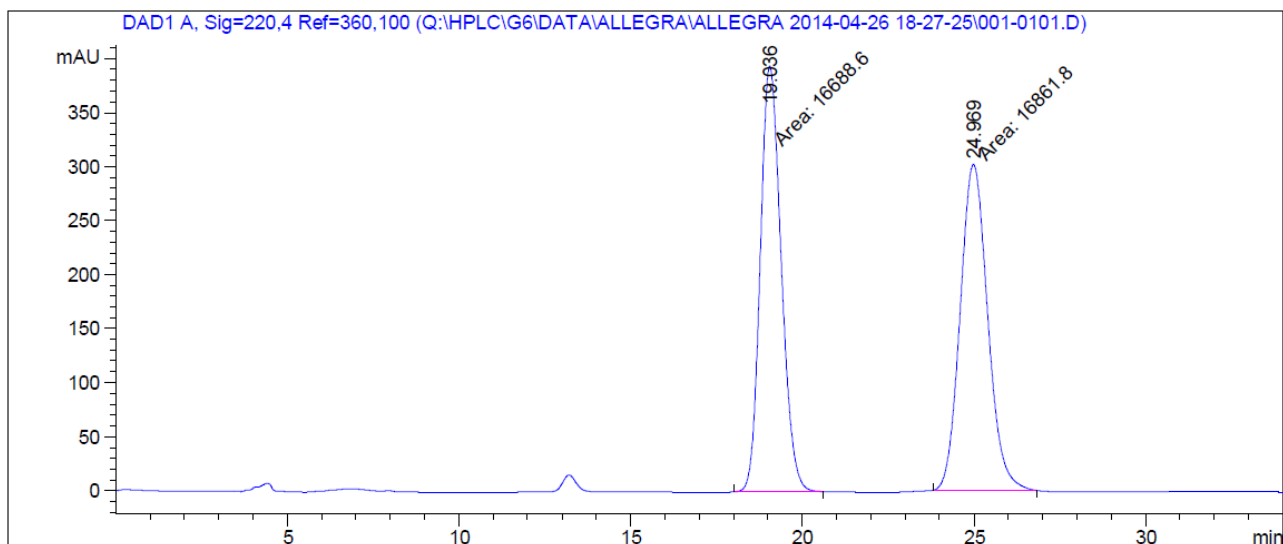

| Peak # | RetTime [min] | Type | Width [min] | Area [mAU*s] | Height [mAU] | Area %  |
|--------|---------------|------|-------------|--------------|--------------|---------|
| 1      | 19.036        | MM   | 0.7055      | 1.66886e4    | 394.22455    | 49.7419 |
| 2      | 24.969        | MM   | 0.9305      | 1.68618e4    | 302.02881    | 50.2581 |

Enantiomerically enriched (93% ee)

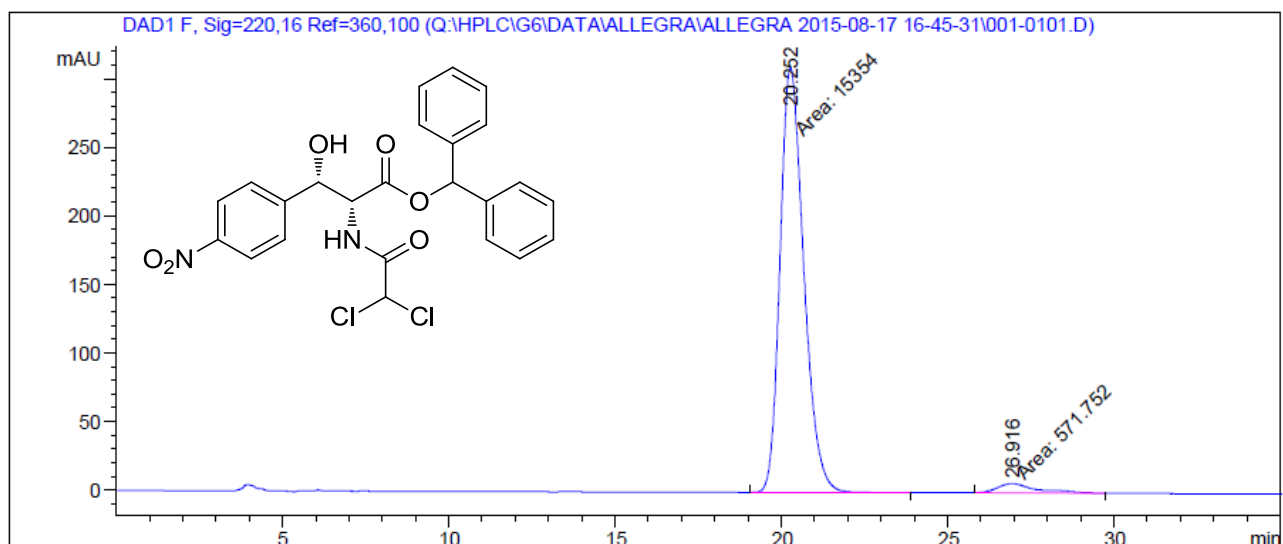

| Peak # | RetTime [min] | Type | Width [min] | Area [mAU*s] | Height [mAU] | Area %  |
|--------|---------------|------|-------------|--------------|--------------|---------|
| 1      | 20.252        | MM   | 0.8255      | 1.53540e4    | 309.98349    | 96.4099 |
| 2      | 26.916        | MM   | 1.3998      | 571.75244    | 6.80745      | 3.5901  |



**(-)-Chloramphenicol (-)-(1)**

**2,2-dichloro-*N*-[(1*R*,2*R*)-1,3-dihydroxy-1-(4-nitrophenyl)propan-2-yl]acetamide**

Chiralpak AD-H column, hexane/*i*-PrOH 90:10, 1.0 mL/min

Racemic

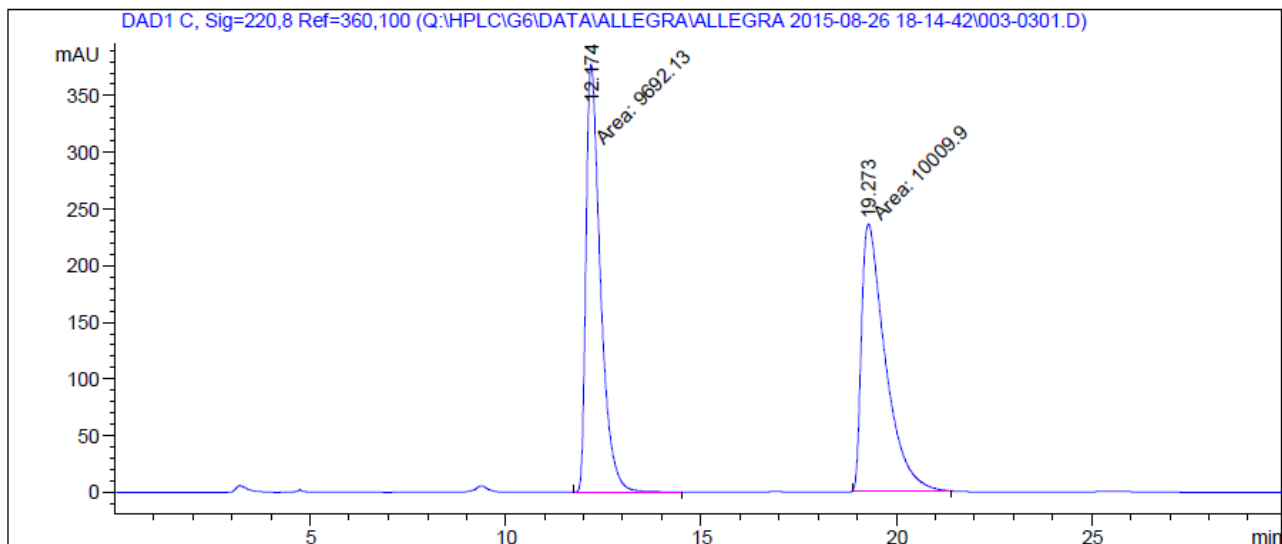

| Peak # | RetTime [min] | Type | Width [min] | Area [mAU*s] | Height [mAU] | Area %  |
|--------|---------------|------|-------------|--------------|--------------|---------|
| 1      | 12.174        | MM   | 0.4283      | 9692.13184   | 377.17380    | 49.1936 |
| 2      | 19.273        | MM   | 0.7076      | 1.00099e4    | 235.76247    | 50.8064 |

Enantiomerically enriched (99% ee)

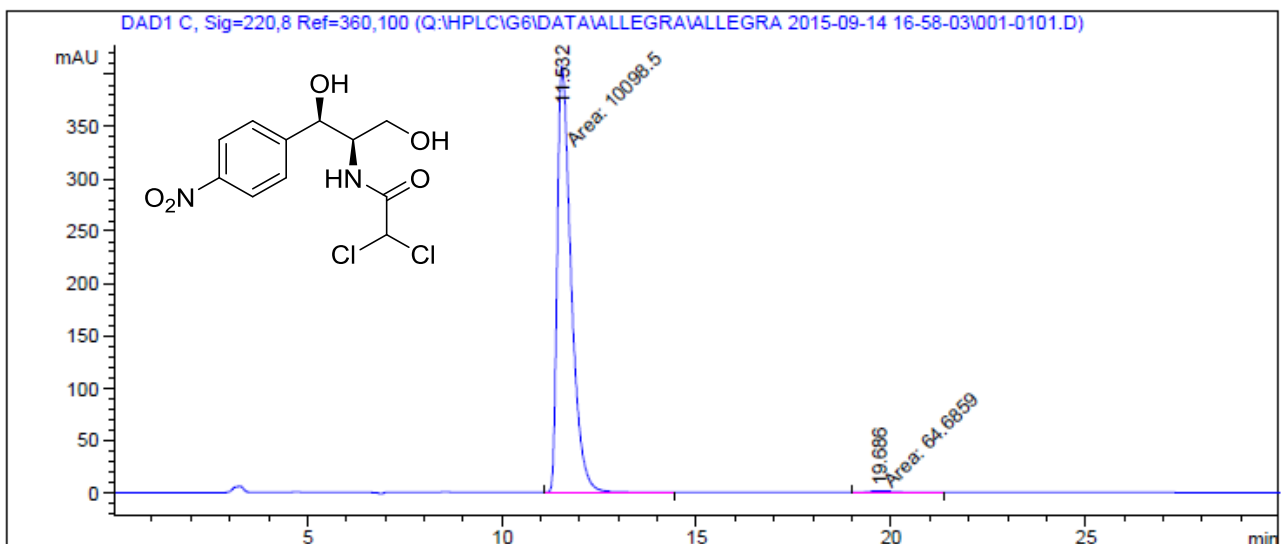

| Peak # | RetTime [min] | Type | Width [min] | Area [mAU*s] | Height [mAU] | Area %  |
|--------|---------------|------|-------------|--------------|--------------|---------|
| 1      | 11.532        | MM   | 0.4134      | 1.00985e4    | 407.15997    | 99.3635 |
| 2      | 19.686        | MM   | 0.7680      | 64.68589     | 1.40372      | 0.6365  |

**(+)-Chloramphenicol (+)-(1)**

**2,2-dichloro-*N*-[(1*S*,2*S*)-1,3-dihydroxy-1-(4-nitrophenyl)propan-2-yl]acetamide**

Chiralpak AD-H column, hexane/*i*-PrOH 90:10, 1.0 mL/min

Racemic



| Peak # | RetTime [min] | Type | Width [min] | Area [mAU*s] | Height [mAU] | Area %  |
|--------|---------------|------|-------------|--------------|--------------|---------|
| 1      | 12.174        | MM   | 0.4283      | 9692.13184   | 377.17380    | 49.1936 |
| 2      | 19.273        | MM   | 0.7076      | 1.00099e4    | 235.76247    | 50.8064 |

Enantiomerically enriched (96% ee)

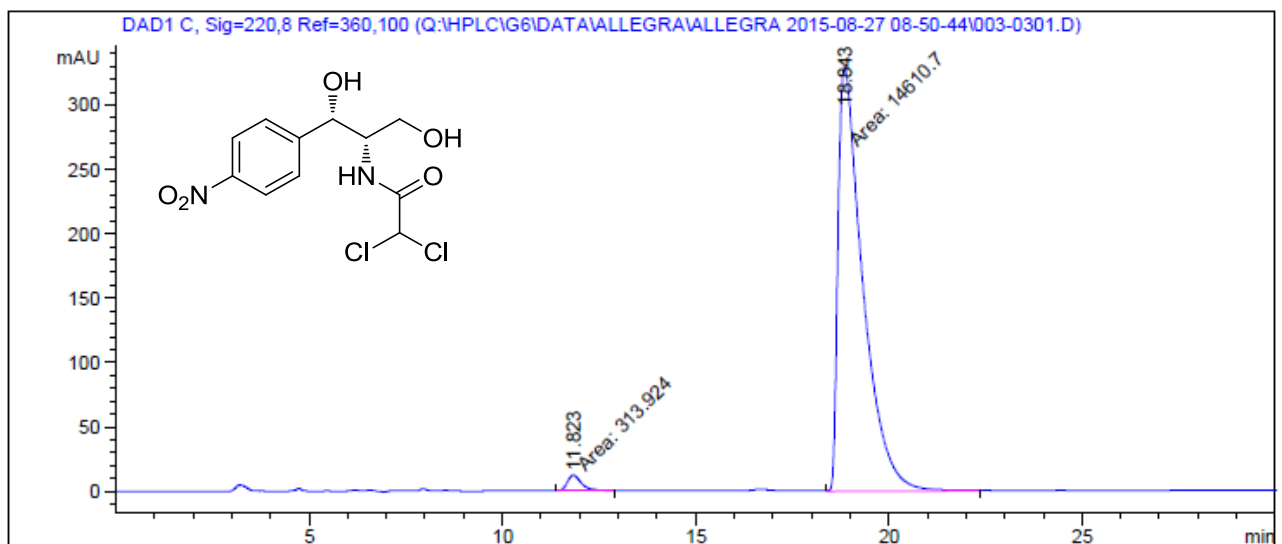

| Peak # | RetTime [min] | Type | Width [min] | Area [mAU*s] | Height [mAU] | Area %  |
|--------|---------------|------|-------------|--------------|--------------|---------|
| 1      | 11.823        | MM   | 0.4304      | 313.92361    | 12.15549     | 2.1034  |
| 2      | 18.843        | MM   | 0.7399      | 1.46107e4    | 329.10623    | 97.8966 |

## 5. References

---

- <sup>1</sup> Still, W. C.; Kahn, M.; Mitra, A. *J. Org. Chem.* **1978**, *43*, 2923.
- <sup>2</sup> Fulmer, G. R.; Miller, A. J. M.; Sherden, N. H.; Gottlieb, H. E.; Nudelman, A.; Stoltz, B. M.; Bercaw, J. E.; Goldberg, K. I. *Organometallics* **2010**, *29*, 2176.
- <sup>3</sup> Aizpurua, J. M.; Palomo, C. *Synth. Commun.* **1983**, *13*, 745.
- <sup>4</sup> Sladojevich, F.; Trabocchi, A.; Guarna, A.; Dixon, D. J. *J. Am. Chem. Soc.* **2011**, *133*, 1710.
- <sup>5</sup> De la Campa, R.; Ortín, I.; Dixon, D. J. *Angew. Chem. Int. Ed.* **2015**, *54*, 4895.
- <sup>6</sup> Novak, B. H.; Lash, T. D. *J. Org. Chem.* **1998**, *63*, 3998.
- <sup>7</sup> Allen, C. L.; Atkinson, B. N.; Williams, J. M. J. *Angew. Chem. Int. Ed.* **2012**, *51*, 1383.
- <sup>8</sup> Ortín, I.; Dixon, D. J. *Angew. Chem. Int. Ed.* **2014**, *53*, 3462.
- <sup>9</sup> Burns, D. H.; Jabara, C. S.; Burden, M. W. *Synth. Commun.* **1995**, *25*, 379.
- <sup>10</sup> Hoppe, D.; Schmincke, H.; Kleemann, H.-W. *Tetrahedron Lett.* **1989**, *45*, 687. Elemental analysis, <sup>1</sup>H NMR, IR and melting point are reported.
- <sup>11</sup> Hayashi, T.; Sawamura, M.; Ito, Y. *Tetrahedron* **1992**, *48*, 1999.
- <sup>12</sup> Chênevert, R.; Thiboutot, S. *Synthesis* **1989**, 444.
- <sup>13</sup> George, S.; Narina, S. V.; Sudalai, A. *Tetrahedron* **2006**, *62*, 10202.
- <sup>14</sup> Bartz, Q. R. *J. Biol. Chem.* **1948**, *172*, 445.
- <sup>15</sup> Rebstock, M. C.; Crooks, H. M.; Controulis, J.; Bartz, Q. R. *J. Am. Chem. Soc.* **1949**, *71*, 2458.
- <sup>16</sup> Controulis, J.; Rebstock, M. C.; Crooks, H. M. *J. Am. Chem. Soc.* **1949**, *71*, 2463.
